# Supplementary material for: Chiral phosphoric acid catalyzed atroposelective and diastereoselective synthesis of 9-aryltetrahydroacridines
Source: Royal Society of Chemistry journal article supplement (doi:10.1039/d0qo00534g), 2020-01-01
Supplement: d0qo00534g1.pdf [file d0qo00534g1.pdf]

# Supporting Information

## Chiral Phosphoric Acid Catalyzed Atroposelective and Diastereoselective Synthesis of 9-Aryltetrahydroacridines

You-Dong Shao, Dan-Dan Han, Wen-Yue Ma and Dao-Juan Cheng\*

School of Chemistry and Chemical Engineering, Heze University, Heze 274015, People's Republic of  
China

E-mail: chengdaojuan0614@163.com

### Table of Contents

|                                                                                                                 |     |
|-----------------------------------------------------------------------------------------------------------------|-----|
| General Information.....                                                                                        | S2  |
| Screening of Catalysts and Condition Optimization.....                                                          | S2  |
| General Procedure for the Atroposelective and Diastereoselective Synthesis of<br>9-Aryltetrahydroacridines..... | S5  |
| Procedure for Scale-up Experiment.....                                                                          | S5  |
| Procedure for the Transformation of Product <b>3aa</b> .....                                                    | S5  |
| Analytic Data for the Products.....                                                                             | S6  |
| References.....                                                                                                 | S19 |
| <sup>1</sup> H and <sup>13</sup> C NMR Spectra of Products.....                                                 | S20 |
| HPLC Traces.....                                                                                                | S49 |
| X-ray Crystallographic Information.....                                                                         | S78 |

## General Information

$^1\text{H}$  and  $^{13}\text{C}$  NMR spectra were recorded on a Bruker AC-400 FT (400 MHz for  $^1\text{H}$  NMR and 100 MHz for  $^{13}\text{C}$  NMR, respectively) using tetramethylsilane as an internal reference. Chemical shifts ( $\delta$ ) and coupling constants ( $J$ ) were expressed in ppm and Hz, respectively. High resolution mass spectra (HRMS) were recorded on a LC-TOF spectrometer (Micromass). ESI-HRMS data were acquired using a Thermo LTQ Orbitrap XL Instrument equipped with an ESI source and controlled by Xcalibur software. High pressure liquid chromatography (HPLC) analyses were performed on a Thermo Scientific UltiMate 3000 instrument equipped with an isostatic pump, using a chiral stationary phase column (Daicel Co. CHIRALPAK). The chiral HPLC methods were calibrated with the corresponding racemic mixtures. Optical Rotation was measured on an Anton Paar MCP 100/150 polarimeter.

Chloroform was distilled over calcium hydride. Other solvents and chemicals were purchased from the Sinopharm Chemical Reagent Co., Adamas, Acros, Alfa Aesar, and TCI, and used as received. Catalysts (*R*)-**C1-C7** were prepared according to the literatures.<sup>1</sup> Catalysts (*R*)-**C8-C12** were purchased from Daicel Chiral Technologies (China) CO., LTD. and used directly. 2-Aminoaryl ketones **1** were prepared in accordance with literature methods.<sup>2-4</sup>

## Screening of Catalysts and Condition Optimization

Table S1. Screening of catalysts.<sup>a</sup>

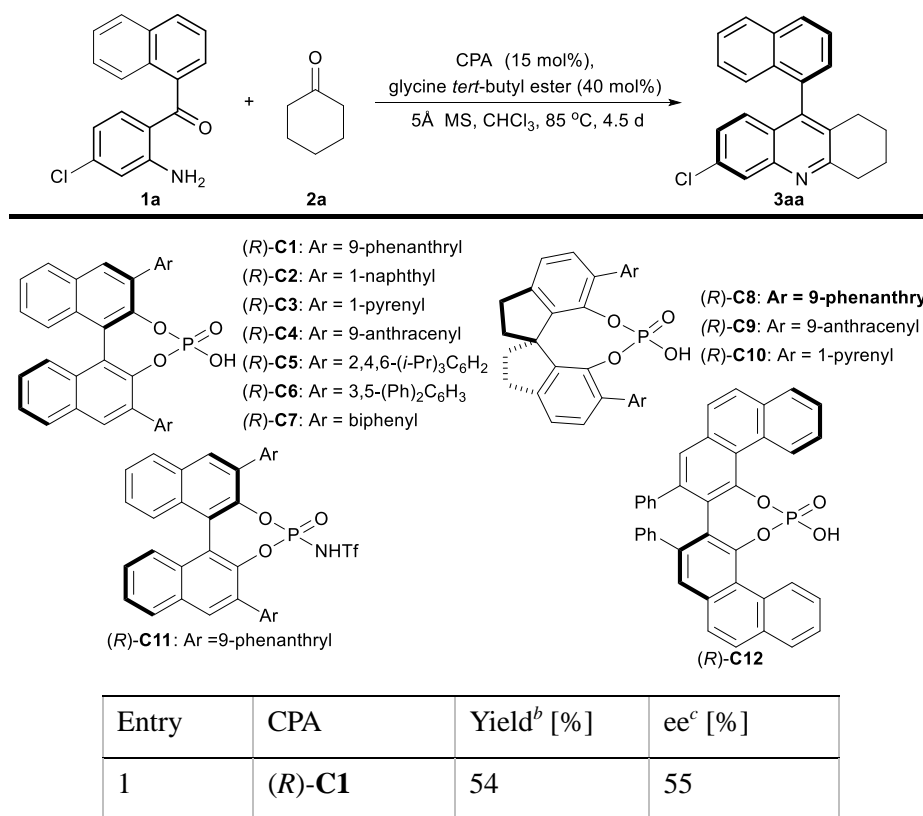

|    |                          |           |           |
|----|--------------------------|-----------|-----------|
| 2  | ( <i>R</i> )- <b>C2</b>  | 58        | 23        |
| 3  | ( <i>R</i> )- <b>C3</b>  | 56        | 49        |
| 4  | ( <i>R</i> )- <b>C4</b>  | 60        | 55        |
| 5  | ( <i>R</i> )- <b>C5</b>  | trace     | 15        |
| 6  | ( <i>R</i> )- <b>C6</b>  | 43        | 1         |
| 7  | ( <i>R</i> )- <b>C7</b>  | 50        | 3         |
| 8  | ( <i>R</i> )- <b>C8</b>  | <b>67</b> | <b>89</b> |
| 9  | ( <i>R</i> )- <b>C9</b>  | 61        | 82        |
| 10 | ( <i>R</i> )- <b>C10</b> | 63        | 84        |
| 11 | ( <i>R</i> )- <b>C11</b> | trace     | 30        |
| 12 | ( <i>R</i> )- <b>C12</b> | 52        | 24        |

<sup>a</sup> All reactions were carried out with (2-amino-4-chlorophenyl)(naphthalen-1-yl)methanone **1a** (28.1 mg, 0.10 mmol), cyclohexanone **2a** (29.4 mg, 31.0  $\mu$ L, 0.30 mmol), catalyst CPA (15 mol%), glycine *tert*-butyl ester (40 mol%) and  $\text{CHCl}_3$  (1.0 mL) in sealed tube for 4.5 d. <sup>b</sup> Isolated yield. <sup>c</sup> Determined by chiral stationary phase HPLC analysis.

**Table S2. Screening of additives, solvents, temperatures *et al.*<sup>a</sup>**

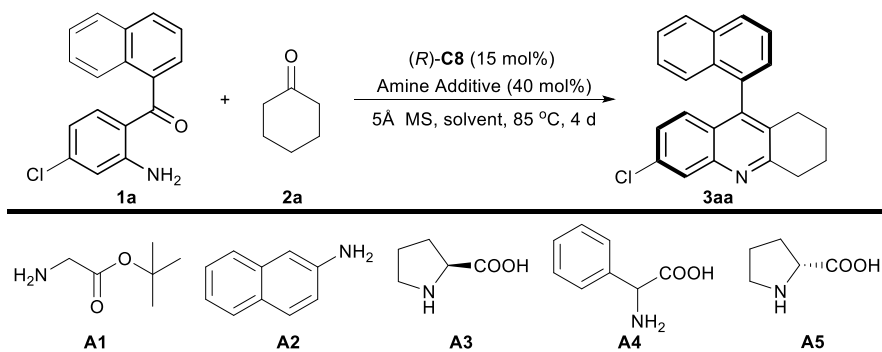

| Entry | Solvent                           | Amine Additive | Yield <sup>b</sup> [%] | ee <sup>c</sup> [%] |
|-------|-----------------------------------|----------------|------------------------|---------------------|
| 1     | $\text{CHCl}_3$                   | <b>A1</b>      | 67                     | 89                  |
| 2     | <b><math>\text{CHCl}_3</math></b> | <b>A2</b>      | <b>72</b>              | <b>90</b>           |
| 3     | $\text{CHCl}_3$                   | <b>A3</b>      | 61                     | 87                  |
| 4     | $\text{CHCl}_3$                   | <b>A4</b>      | 49                     | 86                  |
| 5     | $\text{CHCl}_3$                   | <b>A5</b>      | 60                     | 86                  |
| 6     | Toluene                           | <b>A2</b>      | trace                  | ND                  |
| 7     | $\text{CH}_3\text{CN}$            | <b>A2</b>      | NP                     | ND                  |

|                   |                                             |           |           |           |
|-------------------|---------------------------------------------|-----------|-----------|-----------|
| 8                 | EtOAc                                       | <b>A2</b> | trace     | ND        |
| 9                 | CCl <sub>4</sub>                            | <b>A2</b> | 81        | 82        |
| 10                | DCE                                         | <b>A2</b> | trace     | ND        |
| 11                | <i>n</i> -hexane                            | <b>A2</b> | 80        | 66        |
| 12                | MTBE                                        | <b>A2</b> | 73        | 81        |
| 13 <sup>d</sup>   | <b>CHCl<sub>3</sub>:CCl<sub>4</sub>=4:1</b> | <b>A2</b> | <b>77</b> | <b>92</b> |
| 14 <sup>d</sup>   | CHCl <sub>3</sub> :CCl <sub>4</sub> =3:2    | <b>A2</b> | 79        | 90        |
| 15 <sup>d,e</sup> | CHCl <sub>3</sub> :CCl <sub>4</sub> =4:1    | <b>A2</b> | 73        | 90        |
| 16 <sup>d,f</sup> | CHCl <sub>3</sub> :CCl <sub>4</sub> =4:1    | <b>A2</b> | 67        | 87        |
| 17 <sup>d,g</sup> | CHCl <sub>3</sub> :CCl <sub>4</sub> =4:1    | <b>A2</b> | 74        | 91        |
| 18 <sup>d,h</sup> | CHCl <sub>3</sub> :CCl <sub>4</sub> =4:1    | <b>A2</b> | trace     | ND        |

<sup>a</sup> Unless otherwise stated, all reactions were carried out with (2-amino-4-chlorophenyl)(naphthalen-1-yl)methanone **1a** (28.1 mg, 0.10 mmol), cyclohexanone **2a** (29.4 mg, 31.0 μL, 0.30 mmol), catalyst (*R*)-**C8** (10.0 mg, 15 mol%), amine additive (40 mol%) and solvent (1.0 mL) in sealed tube at 85 °C for 4.5 d. <sup>b</sup> Isolated yield. <sup>c</sup> Determined by chiral stationary phase HPLC analysis. <sup>d</sup> The reaction was run at 80 °C for 4 d. <sup>e</sup> The reaction was run with 0.70 mmol **2a**. <sup>f</sup> The reaction was run with 0.15 mmol **2a**. <sup>g</sup> The reaction was run with 60 mol% of **A2**. <sup>h</sup> The reaction was run with 100 mol% of **A2**.

**Table S3. Preliminary investigations on the different combinations of substrates.<sup>a</sup>**

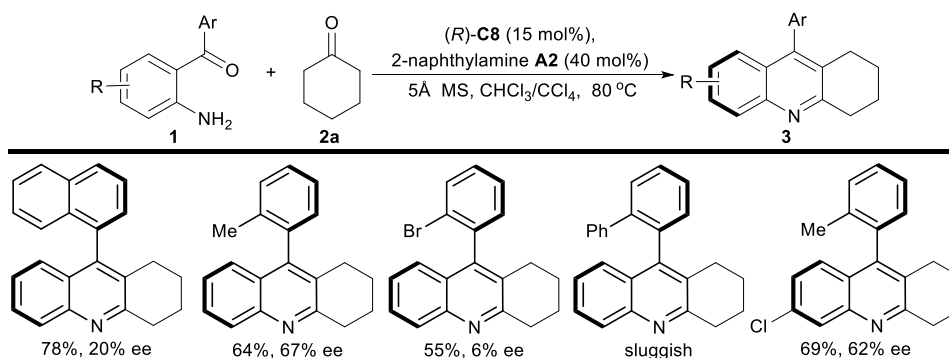

<sup>a</sup> All reactions were carried out with **1** (0.10 mmol), cyclohexanone **2a** (0.30 mmol), (*R*)-**C8** (15 mol%), 2-naphthylamine **A2** (40 mol%) and 5 Å molecular sieves (100 mg) in CHCl<sub>3</sub> (0.8 mL) and CCl<sub>4</sub> (0.2 mL) at 80 °C in sealed tube for 4 d. Yields refer to isolated pure compounds. The ee values were determined by chiral stationary phase HPLC analysis.

## General Procedure for the Atroposelective and Diastereoselective Synthesis of 9-Aryltetrahydroacridines

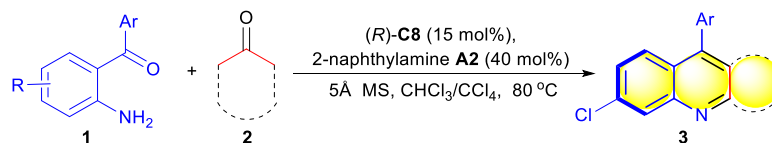

To a flame dried sealed tube equipped with a magnetic stirring bar were added powdered 5 Å molecular sieves (100 mg), chiral phosphoric acid (*R*)-**C8** (10.0 mg, 0.015 mmol), 2-naphthylamine **A2** (5.7 mg, 0.040 mmol), 2-aminoaryl ketone **1** (0.10 mmol), carbon tetrachloride (0.2 mL), anhydrous chloroform (0.8 mL) and alicyclic ketone **2** (0.30 mmol) successively. The resulting mixture was stirred at 80 °C for 4-5 d, and directly charged onto silica gel. Product **3** was isolated using petroleum ether/ethyl acetate (30:1 to 5:1) as eluent.

### Procedure for Scale-up Experiment

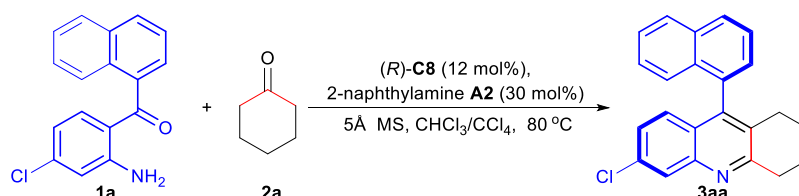

To a flame dried sealed tube equipped with a magnetic stirring bar were added powdered 5 Å molecular sieves (1.00 g), chiral phosphoric acid (*R*)-**C8** (80.1 mg, 0.12 mmol), 2-naphthylamine **A2** (43.0 mg, 0.30 mmol), **1a** (281.1 mg, 1.0 mmol), carbon tetrachloride (4.0 mL), anhydrous chloroform (6.0 mL) and **2a** (245.4 mg, 2.5 mmol) successively. After stirring at 80 °C for 4.5 d, the reaction was quenched with saturated sodium bicarbonate solution (10.0 mL). After being extracted with dichloromethane (3 × 15 mL), the organic phases were combined and washed with brine, dried over anhydrous sodium sulfate, filtered and concentrated in vacuo to give a crude residue which was purified by flash column chromatography (petroleum ether/ethylacetate = 20:1) to give **3aa** (240.2 mg, 70% yield, 89% ee) as a yellow solid.

### Procedure for the Transformation of Product 3aa

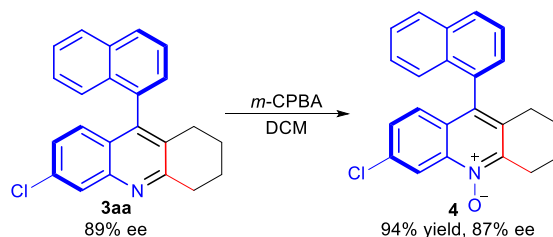

*m*-CPBA (37.0 mg, 0.15 mmol) was added to a solution of (*S*)-**3aa** (34.3 mg, 0.10 mmol) in dichloromethane (5.0 mL) at 0 °C. After stirring for 2 h, the reaction mixture was adjusted to pH = 10 by 1 N NaOH. After being extracted with dichloromethane (3 × 10 mL), the organic phases were combined and washed with brine, dried over anhydrous sodium sulfate, filtered and concentrated in vacuo to give a crude residue which was purified by flash column

chromatography (petroleum ether/ethylacetate = 70:30) to give **4** (33.8 mg, 94% yield) as a white solid.<sup>4</sup>

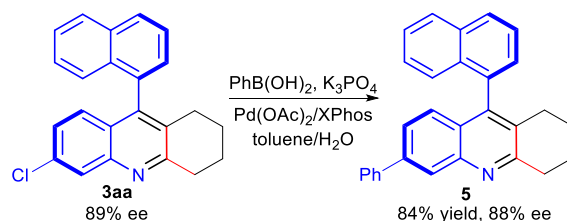

To a flame dried Schlenk flask were added **3aa** (34.3 mg, 0.10 mmol), Pd(OAc)<sub>2</sub> (0.50 mg, 0.002 mmol), XPhos (2.0 mg, 0.004 mmol), phenylboronic acid (24.4 mg, 0.20 mmol) and K<sub>3</sub>PO<sub>4</sub> (85.0 mg, 0.40 mmol) successively. The flask was evacuated and backfilled with nitrogen three times, then toluene (0.80 mL) and H<sub>2</sub>O (0.20 mL) were added. After stirring at 70 °C for 16 hours, the reaction mixture was cooled to room temperature, diluted with ethyl acetate (10 mL) and washed with aqueous NaOH (1 N, 10 mL). After being extracted with ethyl acetate (2 × 10 mL), the combined organic layers were washed with brine (10 mL), dried over anhydrous sodium sulfate, filtered and concentrated in vacuo to give a crude residue which was purified by flash column chromatography (petroleum ether/ethylacetate = 30:1–5:1) to give **5** (32.4 mg, 84% yield) as a yellow oil.<sup>5</sup>

#### Analytic Data for the Products

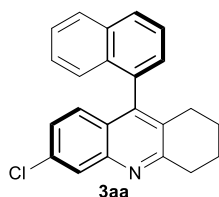

6-Chloro-9-(naphthalen-1-yl)-1,2,3,4-tetrahydroacridine **3aa** was obtained as a white solid in 77% yield (26.4 mg) and 92% ee. The ee value was determined by chiral stationary phase HPLC analysis [Daicel Chiralpak IC, isopropanol/hexane (03:97), 1.0 mL/min,  $\lambda = 254$  nm,  $t_r$  (minor) = 7.63 min,  $t_r$  (major) = 8.06 min]. m.p. 133-134 °C;  $[\alpha]_D^{25} = +27.74$  ( $c = 1.0$ , EtOAc); <sup>1</sup>H NMR (400 MHz, CDCl<sub>3</sub>):  $\delta$  8.07 (d,  $J = 2.0$  Hz, 1H), 7.97 (d,  $J = 8.4$  Hz, 2H), 7.61 (t,  $J = 7.6$  Hz, 1H), 7.50 (t,  $J = 7.6$  Hz, 1H), 7.35-7.27 (m, 2H), 7.17-7.09 (m, 2H), 7.03 (d,  $J = 8.8$  Hz, 1H), 3.23 (t,  $J = 6.8$  Hz, 2H), 2.62-2.47 (m, 1H), 2.38-2.26 (m, 1H), 2.01-1.90 (m, 2H), 1.78-1.65 (m, 2H); <sup>13</sup>C NMR (100 MHz, CDCl<sub>3</sub>):  $\delta$  160.5, 146.7, 145.0, 134.3, 134.2, 133.7, 131.3, 130.0, 128.6, 128.5, 127.4, 127.3, 126.9, 126.7, 126.5, 126.3, 125.7, 125.6, 125.2, 34.3, 27.5, 22.8, 22.8; HRMS (ESI) calcd for C<sub>23</sub>H<sub>19</sub>ClN (M+H)<sup>+</sup> 344.1201, found 344.1200.

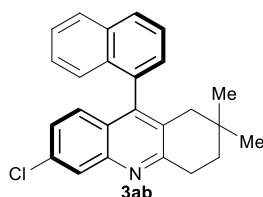

6-Chloro-2,2-dimethyl-9-(naphthalen-1-yl)-1,2,3,4-tetrahydroacridine **3ab** was obtained as a

white solid in 69% yield (25.6 mg) and 91% ee. The ee value was determined by chiral stationary phase HPLC analysis [Daicel Chiralpak AD-H, isopropanol/hexane (03:97), 1.0 mL/min,  $\lambda = 254$  nm,  $t_r$  (major) = 9.12 min,  $t_r$  (minor) = 9.93 min]. m.p.  $>240$  °C;  $[\alpha]_D^{25} = +16.67$  (c = 1.0, EtOAc);  $^1\text{H NMR}$  (400 MHz,  $\text{CDCl}_3$ ):  $\delta$  8.07 (s, 1H), 7.99 (t,  $J = 8.8$  Hz, 2H), 7.63 (t,  $J = 7.6$  Hz, 1H), 7.51 (t,  $J = 7.6$  Hz, 1H), 7.36-7.22 (m, 2H), 7.18-7.05 (m, 2H), 6.99 (d,  $J = 8.8$  Hz, 1H), 3.27 (t,  $J = 6.8$  Hz, 2H), 2.34 (d,  $J = 16.8$  Hz, 1H), 2.10 (d,  $J = 16.8$  Hz, 1H), 1.77 (t,  $J = 6.8$  Hz, 2H), 0.90 (s, 3H), 0.86 (s, 3H);  $^{13}\text{C NMR}$  (100 MHz,  $\text{CDCl}_3$ ):  $\delta$  159.7, 146.8, 145.5, 134.3, 134.2, 133.7, 131.4, 129.4, 128.5, 128.5, 127.4, 126.9, 126.7, 126.5, 126.3, 125.7, 125.6, 125.2, 41.2, 35.6, 31.0, 29.5, 28.4, 27.4; HRMS (ESI) calcd for  $\text{C}_{25}\text{H}_{23}\text{ClN}$  (M+H) $^+$  372.1514, found 372.1513.

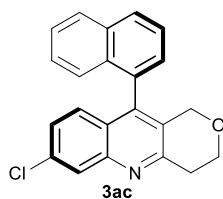

7-Chloro-10-(naphthalen-1-yl)-3,4-dihydro-1H-pyrano[4,3-*b*]quinoline **3ac** was obtained as a yellow solid in 70% yield (24.2 mg) and 90% ee. The ee value was determined by chiral stationary phase HPLC analysis [Daicel Chiralpak IC, isopropanol/hexane (10:90), 1.0 mL/min,  $\lambda = 254$  nm,  $t_r$  (minor) = 8.10 min,  $t_r$  (major) = 9.53 min]. m.p. 141-142 °C;  $[\alpha]_D^{25} = +14.74$  (c = 1.0, EtOAc);  $^1\text{H NMR}$  (400 MHz,  $\text{CDCl}_3$ ):  $\delta$  8.16 (d,  $J = 2.0$  Hz, 1H), 8.05-7.95 (m, 2H), 7.66-7.59 (m, 1H), 7.56-7.49 (m, 1H), 7.38-7.29 (m, 2H), 7.24 (dd,  $J = 8.8, 2.0$  Hz, 1H), 7.12 (d,  $J = 9.2$  Hz, 2H), 4.56 (d,  $J = 16.0$  Hz, 1H), 4.31 (d,  $J = 16.0$  Hz, 1H), 4.18-4.05 (m, 2H), 3.42-3.28 (m, 2H);  $^{13}\text{C NMR}$  (100 MHz,  $\text{CDCl}_3$ ):  $\delta$  155.3, 146.2, 141.5, 134.0, 132.6, 131.0, 129.9, 128.1, 127.6, 126.6, 126.4, 126.1, 126.1, 126.0, 125.8, 125.5, 124.5, 124.4, 123.9, 65.6, 64.5, 32.0; HRMS (ESI) calcd for  $\text{C}_{22}\text{H}_{17}\text{ClNO}$  (M+H) $^+$  346.0993, found 346.0992.

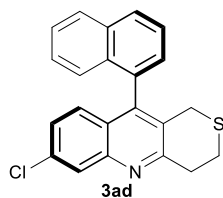

7-Chloro-10-(naphthalen-1-yl)-3,4-dihydro-1H-thiopyrano[4,3-*b*]quinoline **3ad** was obtained as a yellow solid in 74% yield (26.7 mg) and 89% ee. The ee value was determined by chiral stationary phase HPLC analysis [Daicel Chiralpak IC, isopropanol/hexane (07:93), 1.0 mL/min,  $\lambda = 254$  nm,  $t_r$  (minor) = 6.96 min,  $t_r$  (major) = 7.54 min]. m.p. 78-79 °C;  $[\alpha]_D^{25} = +15.63$  (c = 1.0, EtOAc);  $^1\text{H NMR}$  (400 MHz,  $\text{CDCl}_3$ ):  $\delta$  8.11 (d,  $J = 2.0$  Hz, 1H), 8.03-7.94 (m, 2H), 7.67-7.58 (m, 1H), 7.55-7.48 (m, 1H), 7.38-7.31 (m, 2H), 7.22 (dd,  $J = 8.8, 2.0$  Hz,

1H), 7.16 (d,  $J = 8.8$  Hz, 1H), 7.10 (d,  $J = 9.2$  Hz, 1H), 3.56-3.45 (m, 3H), 3.39 (d,  $J = 5.2$  Hz, 1H), 3.16-3.03 (m, 2H);  $^{13}\text{C}$  NMR (100 MHz,  $\text{CDCl}_3$ ):  $\delta$  159.4, 147.0, 143.3, 135.0, 133.6, 132.9, 131.6, 129.1, 128.7, 128.6, 127.9, 127.6, 127.3, 127.2, 127.0, 126.5, 125.8, 125.5, 125.3, 34.7, 27.0, 25.8; HRMS (ESI) calcd for  $\text{C}_{22}\text{H}_{17}\text{ClNS}$  ( $\text{M}+\text{H}$ ) $^+$  362.0765, found 362.0764.

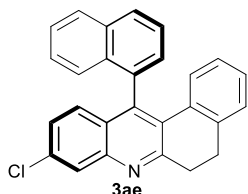

9-Chloro-12-(naphthalen-1-yl)-5,6-dihydrobenzo[*a*]acridine **3ae** was obtained as a pink solid in 80% yield (31.3 mg) and 81% ee. The ee value was determined by chiral stationary phase HPLC analysis [Daicel Chiralpak IC, isopropanol/hexane (03:97), 1.0 mL/min,  $\lambda = 254$  nm,  $t_r$  (minor) = 8.49 min,  $t_r$  (major) = 9.03 min]. m.p. 97-98 °C;  $[\alpha]_D^{25} = +12.44$  ( $c = 1.0$ , EtOAc);  $^1\text{H}$  NMR (400 MHz,  $\text{CDCl}_3$ ):  $\delta$  8.11 (d,  $J = 2.4$  Hz, 1H), 7.98 (d,  $J = 8.0$  Hz, 2H), 7.55-7.46 (m, 2H), 7.35-7.30 (m, 2H), 7.28-7.23 (m, 1H), 7.22-7.18 (m, 1H), 7.16 (dd,  $J = 9.2, 2.4$  Hz, 1H), 7.08 (d,  $J = 9.2$  Hz, 1H), 7.04-6.98 (m, 1H), 6.61-6.55 (m, 2H), 3.41-3.32 (m, 1H), 3.31-3.22 (m, 1H), 3.11-2.97 (m, 2H);  $^{13}\text{C}$  NMR (100 MHz,  $\text{CDCl}_3$ ):  $\delta$  162.5, 146.7, 142.2, 139.6, 135.4, 135.0, 133.6, 132.5, 128.8, 128.8, 128.7, 128.4, 127.8, 127.8, 127.7, 127.7, 127.6, 127.0, 126.9, 126.8, 126.4, 126.0, 126.0, 125.8, 34.8, 29.3; HRMS (ESI) calcd for  $\text{C}_{27}\text{H}_{19}\text{ClN}$  ( $\text{M}+\text{H}$ ) $^+$  392.1201, found 392.1199.

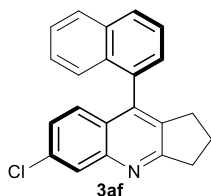

6-Chloro-9-(naphthalen-1-yl)-2,3-dihydro-1*H*-cyclopenta[*b*]quinoline **3af** was obtained as a white solid in 81% yield (26.7 mg) and 80% ee. The ee value was determined by chiral stationary phase HPLC analysis [Daicel Chiralpak IC, isopropanol/hexane (05:95), 1.0 mL/min,  $\lambda = 254$  nm,  $t_r$  (minor) = 8.82 min,  $t_r$  (major) = 9.42 min]. m.p. 85-86 °C;  $[\alpha]_D^{25} = +13.57$  ( $c = 1.0$ , EtOAc);  $^1\text{H}$  NMR (400 MHz,  $\text{CDCl}_3$ ):  $\delta$  8.12-8.08 (m, 1H), 7.97 (t,  $J = 8.4$  Hz, 2H), 7.64-7.57 (m, 1H), 7.53-7.48 (m, 1H), 7.39-7.31 (m, 2H), 7.24-7.19 (m, 3H), 3.31-3.24 (m, 2H), 2.80-2.70 (m, 1H), 2.66-2.55 (m, 1H), 2.19-2.09 (m, 2H);  $^{13}\text{C}$  NMR (100 MHz,  $\text{CDCl}_3$ ):  $\delta$  168.8, 148.3, 141.4, 135.5, 134.2, 133.9, 133.7, 131.2, 128.7, 128.6, 127.8, 127.3, 126.9, 126.6, 126.5, 126.3, 125.6, 125.5, 125.4, 35.2, 30.0, 23.2; HRMS (ESI) calcd for  $\text{C}_{22}\text{H}_{17}\text{ClN}$  ( $\text{M}+\text{H}$ ) $^+$  330.1044, found 330.1044.



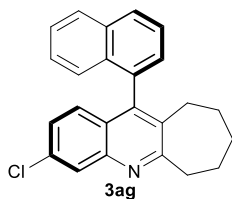

3-Chloro-11-(naphthalen-1-yl)-7,8,9,10-tetrahydro-6H-cyclohepta[*b*]quinoline **3ag** was obtained as a white solid in 70% yield (25.0 mg) and 80% ee. The ee value was determined by chiral stationary phase HPLC analysis [Daicel Chiralpak IC, isopropanol/hexane (03:97), 1.0 mL/min,  $\lambda = 254$  nm,  $t_r$  (minor) = 7.27 min,  $t_r$  (major) = 7.74 min]. m.p. 99-100 °C;  $[\alpha]_D^{25} = +12.86$  ( $c = 1.0$ , EtOAc);  $^1\text{H NMR}$  (400 MHz,  $\text{CDCl}_3$ ):  $\delta$  8.07 (d,  $J = 2.0$  Hz, 1H), 7.96 (t,  $J = 9.2$  Hz, 2H), 7.59 (t,  $J = 7.6$  Hz, 1H), 7.49 (t,  $J = 7.6$  Hz, 1H), 7.34-7.26 (m, 2H), 7.18-7.09 (m, 2H), 6.94 (d,  $J = 8.8$  Hz, 1H), 3.37-3.25 (m, 2H), 2.60-2.49 (m, 2H), 1.95-1.75 (m, 4H), 1.56-1.39 (m, 2H);  $^{13}\text{C NMR}$  (100 MHz,  $\text{CDCl}_3$ ):  $\delta$  166.1, 146.3, 143.8, 135.4, 134.7, 134.1, 133.5, 132.0, 128.5, 128.4, 127.9, 127.6, 127.1, 126.6, 126.6, 126.3, 125.9, 125.7, 125.4, 40.3, 31.9, 30.9, 28.3, 27.0; HRMS (ESI) calcd for  $\text{C}_{24}\text{H}_{21}\text{ClN}$  ( $\text{M}+\text{H}$ ) $^+$  358.1357, found 358.1356.

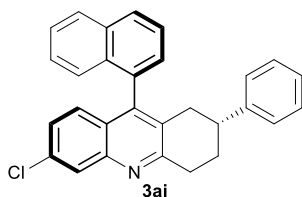

6-Chloro-9-(naphthalen-1-yl)-2-phenyl-1,2,3,4-tetrahydroacridine **3ai** was obtained as a yellow solid in 71% yield (29.8 mg), 90:10 dr and 92% ee for the major diastereoisomer. The ee value was determined by chiral stationary phase HPLC analysis [Daicel Chiralpak AD-H, isopropanol/hexane (05:95), 1.0 mL/min,  $\lambda = 254$  nm,  $t_r$  (major) = 11.15 min,  $t_r$  (minor) = 12.06 min]. m.p. 217-218 °C;  $[\alpha]_D^{25} = +115.78$  ( $c = 1.0$ , EtOAc);  $^1\text{H NMR}$  (400 MHz,  $\text{CDCl}_3$ ):  $\delta$  8.10 (d,  $J = 2.4$  Hz, 1H), 7.97-7.89 (m, 2H), 7.64-7.55 (m, 1H), 7.50-7.43 (m, 1H), 7.35-7.27 (m, 2H), 7.22-7.07 (m, 7H), 7.03 (d,  $J = 8.8$  Hz, 1H), 3.51-3.27 (m, 2H), 3.08-2.93 (m, 1H), 2.86-2.76 (m, 1H), 2.49-2.38 (m, 1H), 2.32-2.22 (m, 1H), 2.19-2.09 (m, 1H);  $^{13}\text{C NMR}$  (100 MHz,  $\text{CDCl}_3$ ):  $\delta$  159.5, 146.8, 145.5, 145.4, 134.6, 133.9, 133.8, 131.4, 129.4, 128.7, 128.7, 128.5, 128.5, 127.5, 127.4, 126.8, 126.8, 126.7, 126.6, 126.4, 126.3, 125.7, 125.7, 125.6, 125.1, 40.4, 35.1, 34.3, 30.1; HRMS (ESI) calcd for  $\text{C}_{29}\text{H}_{23}\text{ClN}$  ( $\text{M}+\text{H}$ ) $^+$  420.1514, found 420.1512.

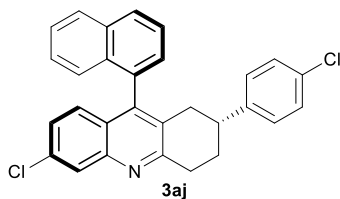

6-Chloro-2-(4-chlorophenyl)-9-(naphthalen-1-yl)-1,2,3,4-tetrahydroacridine **3aj** was obtained

as a yellow solid in 74% yield (33.5 mg), 88:12 dr and 92% ee for the major diastereoisomer. The ee value was determined by chiral stationary phase HPLC analysis [Daicel Chiralpak AD-H, isopropanol/hexane (05:95), 1.0 mL/min,  $\lambda = 254$  nm,  $t_r$  (major) = 10.08 min,  $t_r$  (minor) = 10.95 min]. m.p. 214-215 °C;  $[\alpha]_D^{25} = +128.30$  (c = 1.0, EtOAc);  $^1\text{H NMR}$  (400 MHz,  $\text{CDCl}_3$ ):  $\delta$  8.09 (d,  $J = 2.4$  Hz, 1H), 7.95 (t,  $J = 7.6$  Hz, 2H), 7.60 (t,  $J = 7.6$  Hz, 1H), 7.49 (t,  $J = 7.6$  Hz, 1H), 7.37-7.28 (m, 2H), 7.21-7.13 (m, 3H), 7.10 (d,  $J = 8.4$  Hz, 1H), 7.03 (t,  $J = 8.0$  Hz, 3H), 3.51-3.27 (m, 2H), 3.08-2.93 (m, 1H), 2.86-2.76 (m, 1H), 2.49-2.38 (m, 1H), 2.32-2.22 (m, 1H), 2.19-2.09 (m, 1H);  $^{13}\text{C NMR}$  (100 MHz,  $\text{CDCl}_3$ ):  $\delta$  159.2, 146.9, 145.4, 143.7, 134.6, 133.7, 133.7, 132.0, 131.2, 128.9, 128.7, 128.6, 128.5, 128.1, 127.4, 127.4, 126.8, 126.7, 126.6, 126.3, 125.6, 125.5, 125.0, 39.7, 35.0, 34.0, 29.9; HRMS (ESI) calcd for  $\text{C}_{29}\text{H}_{22}\text{Cl}_2\text{N}$  (M+H) $^+$  454.1124, found 454.1123.

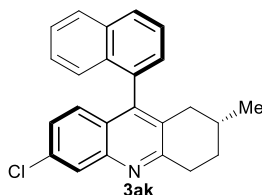

6-Chloro-2-methyl-9-(naphthalen-1-yl)-1,2,3,4-tetrahydroacridine **3ak** was obtained as a yellow solid in 68% yield (24.3 mg), 75:25 dr and 87% ee for the major diastereoisomer. The ee value was determined by chiral stationary phase HPLC analysis [Daicel Chiralpak OD-H, isopropanol/hexane (04:96), 1.0 mL/min,  $\lambda = 254$  nm,  $t_r$  (major) = 5.09 min,  $t_r$  (minor) = 5.46 min]. m.p. 117-118 °C;  $[\alpha]_D^{25} = +68.14$  (c = 1.0, EtOAc);  $^1\text{H NMR}$  (400 MHz,  $\text{CDCl}_3$ ):  $\delta$  8.07 (d,  $J = 2.0$  Hz, 1H), 7.97 (t,  $J = 8.8$  Hz, 2H), 7.64-7.58 (m, 1H), 7.52-7.46 (m, 1H), 7.33-7.27 (m, 2H), 7.16-7.08 (m, 2H), 7.02 (d,  $J = 8.8$  Hz, 1H), 3.39-3.30 (m, 1H), 3.27-3.15 (m, 1H), 2.65-2.55 (m, 1H), 2.08-2.00 (m, 1H), 1.92-1.80 (m, 1H), 1.66-1.53 (m, 2H), 0.87 (d,  $J = 6.4$  Hz, 3H);  $^{13}\text{C NMR}$  (100 MHz,  $\text{CDCl}_3$ ):  $\delta$  160.1, 146.8, 145.0, 134.3, 134.2, 133.7, 131.4, 129.6, 128.6, 128.5, 127.4, 127.4, 126.7, 126.7, 126.5, 126.3, 125.7, 125.6, 125.3, 35.5, 33.8, 31.0, 29.0, 21.5; HRMS (ESI) calcd for  $\text{C}_{24}\text{H}_{21}\text{ClN}$  (M+H) $^+$  358.1357, found 358.1356.

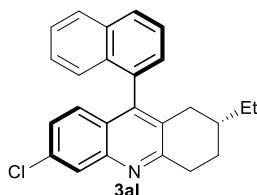

6-Chloro-2-ethyl-9-(naphthalen-1-yl)-1,2,3,4-tetrahydroacridine **3al** was obtained as a white solid in 75% yield (27.8 mg), 88:12 dr and 91% ee for the major diastereoisomer. The ee value was determined by chiral stationary phase HPLC analysis [Daicel Chiralpak AD-H, isopropanol/hexane (03:97), 1.0 mL/min,  $\lambda = 254$  nm,  $t_r$  (major) = 8.47 min,  $t_r$  (minor) = 9.70 min]. m.p. 135-136 °C;  $[\alpha]_D^{25} = +80.71$  (c = 1.0, EtOAc);  $^1\text{H NMR}$  (400 MHz,  $\text{CDCl}_3$ ):  $\delta$  8.07

(d,  $J = 2.0$  Hz, 1H), 7.99 (t,  $J = 8.4$  Hz, 2H), 7.67-7.60 (m, 1H), 7.54-7.47 (m, 1H), 7.35-7.27 (m, 2H), 7.16 (dd,  $J = 8.8, 2.0$  Hz, 1H), 7.10 (d,  $J = 8.4$  Hz, 1H), 7.02 (d,  $J = 8.8$  Hz, 1H), 3.39-3.29 (m, 1H), 3.25-3.11 (m, 1H), 2.68-2.56 (m, 1H), 2.18-2.06 (m, 1H), 2.04-1.95 (m, 1H), 1.68-1.51 (m, 2H), 1.25-1.15 (m, 2H), 0.78 (t,  $J = 7.2$  Hz, 3H);  $^{13}\text{C}$  NMR (100 MHz,  $\text{CDCl}_3$ ):  $\delta$  160.5, 146.8, 145.1, 134.3, 134.2, 133.7, 131.4, 129.7, 128.6, 128.5, 128.5, 127.4, 127.4, 126.7, 126.5, 126.3, 125.7, 125.6, 125.3, 35.5, 33.7, 33.5, 28.4, 28.2, 11.5; HRMS (ESI) calcd for  $\text{C}_{25}\text{H}_{23}\text{ClN}$  ( $\text{M}+\text{H}$ ) $^+$  372.1514, found 372.1512.

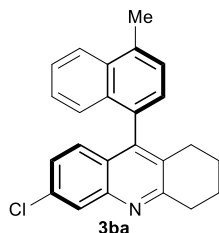

6-Chloro-9-(4-methylnaphthalen-1-yl)-1,2,3,4-tetrahydroacridine **3ba** was obtained as a white solid in 79% yield (28.2 mg) and 92% ee. The ee value was determined by chiral stationary phase HPLC analysis [Daicel Chiralpak IC, isopropanol/hexane (05:95), 1.0 mL/min,  $\lambda = 254$  nm,  $t_r$  (minor) = 7.24 min,  $t_r$  (major) = 7.68 min]. m.p. 95-96 °C;  $[\alpha]_{\text{D}}^{25} = +30.05$  ( $c = 1.0$ , EtOAc);  $^1\text{H}$  NMR (400 MHz,  $\text{CDCl}_3$ ):  $\delta$  8.19-7.94 (m, 2H), 7.58-7.40 (m, 2H), 7.35-7.26 (m, 1H), 7.21-6.98 (m, 4H), 3.33-3.14 (m, 2H), 2.80 (s, 3H), 2.60-2.25 (m, 2H), 2.01-1.61 (m, 4H);  $^{13}\text{C}$  NMR (100 MHz,  $\text{CDCl}_3$ ):  $\delta$  160.4, 146.7, 145.4, 135.0, 134.2, 132.8, 132.4, 131.4, 130.2, 127.4, 127.4, 126.6, 126.4, 126.4, 126.3, 126.1, 125.9, 125.8, 124.7, 34.4, 27.5, 22.9, 22.8, 19.6; HRMS (ESI) calcd for  $\text{C}_{24}\text{H}_{21}\text{ClN}$  ( $\text{M}+\text{H}$ ) $^+$  358.1357, found 358.1356.

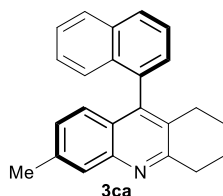

6-Methyl-9-(naphthalen-1-yl)-1,2,3,4-tetrahydroacridine **3ca** was obtained as a yellow solid in 82% yield (26.5 mg) and 90% ee. The ee value was determined by chiral stationary phase HPLC analysis [Daicel Chiralpak AS-H, isopropanol/hexane (03:97), 1.0 mL/min,  $\lambda = 254$  nm,  $t_r$  (major) = 7.23 min,  $t_r$  (minor) = 8.07 min]. m.p. 118-119 °C;  $[\alpha]_{\text{D}}^{25} = +15.17$  ( $c = 1.0$ , EtOAc);  $^1\text{H}$  NMR (400 MHz,  $\text{CDCl}_3$ ):  $\delta$  8.00-7.90 (m, 2H), 7.87 (s, 1H), 7.59 (t,  $J = 7.6$  Hz, 1H), 7.47 (t,  $J = 7.6$  Hz, 1H), 7.34-7.23 (m, 2H), 7.16 (d,  $J = 8.4$  Hz, 1H), 7.07-6.94 (m, 2H), 3.24 (t,  $J = 6.8$  Hz, 2H), 2.59-2.42 (m, 4H), 2.36-2.24 (m, 1H), 2.00-1.86 (m, 2H), 1.79-1.60 (m, 2H);  $^{13}\text{C}$  NMR (100 MHz,  $\text{CDCl}_3$ ):  $\delta$  159.0, 146.5, 144.9, 138.7, 135.0, 133.6, 131.5, 128.8, 128.5, 128.2, 127.8, 127.3, 126.8, 126.5, 126.2, 125.6, 125.6, 125.4, 125.3, 34.2, 27.4, 23.0, 23.0, 21.8; HRMS (ESI) calcd for  $\text{C}_{24}\text{H}_{22}\text{N}$  ( $\text{M}+\text{H}$ ) $^+$  324.1747, found 324.1745.

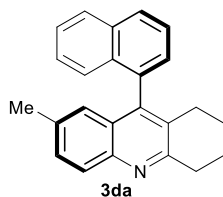

7-Methyl-9-(naphthalen-1-yl)-1,2,3,4-tetrahydroacridine **3da** was obtained as a white solid in 77% yield (24.9 mg) and 70% ee. The ee value was determined by chiral stationary phase HPLC analysis [Daicel Chiralpak AD-H, isopropanol/hexane (08:92), 1.0 mL/min,  $\lambda = 254$  nm,  $t_r$  (major) = 8.09 min,  $t_r$  (minor) = 8.96 min]. m.p. 179-180 °C;  $[\alpha]_D^{25} = +9.85$  (c = 1.0, EtOAc);  $^1\text{H NMR}$  (400 MHz,  $\text{CDCl}_3$ ):  $\delta$  8.02-7.88 (m, 3H), 7.59 (t,  $J = 8.0$  Hz, 1H), 7.50-7.38 (m, 2H), 7.31-7.25 (m, 2H), 7.19 (d,  $J = 8.4$  Hz, 1H), 6.86 (s, 1H), 3.23 (t,  $J = 6.8$  Hz, 2H), 2.55-2.44 (m, 1H), 2.35-2.25 (m, 1H), 2.21 (s, 3H), 1.99-1.89 (m, 2H), 1.76-1.61 (m, 2H);  $^{13}\text{C NMR}$  (100 MHz,  $\text{CDCl}_3$ ):  $\delta$  158.0, 145.0, 144.3, 135.3, 135.1, 133.7, 131.5, 130.9, 129.6, 128.5, 128.2, 127.2, 126.9, 126.6, 126.2, 125.7, 125.5, 124.6, 34.3, 27.5, 23.1, 23.0, 21.7; HRMS (ESI) calcd for  $\text{C}_{24}\text{H}_{22}\text{N}$  ( $\text{M}+\text{H}$ ) $^+$  324.1747, found 324.1746.

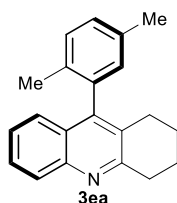

9-(2,5-Dimethylphenyl)-1,2,3,4-tetrahydroacridine **3ea** was obtained as a white solid in 73% yield (21.0 mg) and 76% ee. The ee value was determined by chiral stationary phase HPLC analysis [Daicel Chiralpak AD-H, isopropanol/hexane (10:90), 1.0 mL/min,  $\lambda = 254$  nm,  $t_r$  (minor) = 4.44 min,  $t_r$  (major) = 5.77 min]. m.p. 134-135 °C;  $[\alpha]_D^{25} = -5.86$  (c = 1.0, EtOAc);  $^1\text{H NMR}$  (400 MHz,  $\text{CDCl}_3$ ):  $\delta$  8.03 (d,  $J = 8.4$  Hz, 1H), 7.59 (t,  $J = 7.6$  Hz, 1H), 7.35-7.12 (m, 4H), 6.87 (s, 1H), 3.21 (t,  $J = 6.8$  Hz, 2H), 2.66-2.50 (m, 1H), 2.45-2.38 (m, 1H), 2.36 (s, 3H), 2.04-1.91 (m, 2H), 1.86 (s, 3H), 1.83-1.73 (m, 2H);  $^{13}\text{C NMR}$  (100 MHz,  $\text{CDCl}_3$ ):  $\delta$  159.2, 146.5, 146.3, 136.5, 135.6, 132.6, 130.1, 129.4, 128.7, 128.5, 128.4, 126.4, 125.5, 34.3, 27.7, 23.0, 23.0, 21.0, 19.0; HRMS (ESI) calcd for  $\text{C}_{21}\text{H}_{22}\text{N}$  ( $\text{M}+\text{H}$ ) $^+$  288.1747, found 288.1746.

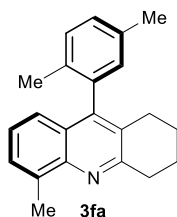

9-(2,5-Dimethylphenyl)-5-methyl-1,2,3,4-tetrahydroacridine **3fa** was obtained as a white

solid in 82% yield (24.7 mg) and 94% ee. The ee value was determined by chiral stationary phase HPLC analysis [Daicel Chiralpak AD-H, isopropanol/hexane (03:97), 1.0 mL/min,  $\lambda = 254$  nm,  $t_r$  (minor) = 3.37 min,  $t_r$  (major) = 3.95 min]. m.p. 130-131 °C;  $[\alpha]_D^{25} = +12.43$  (c = 1.0, EtOAc);  $^1\text{H NMR}$  (400 MHz,  $\text{CDCl}_3$ ):  $\delta$  7.43 (d,  $J = 7.2$  Hz, 1H), 7.23 (d,  $J = 8.0$  Hz, 1H), 7.20-7.13 (m, 2H), 7.03 (d,  $J = 8.4$  Hz, 1H), 6.85 (s, 1H), 3.21 (t,  $J = 6.8$  Hz, 2H), 2.83 (s, 3H), 2.63-2.51 (m, 1H), 2.42-2.30 (m, 4H), 2.00-1.91 (m, 2H), 1.87-1.71 (m, 5H);  $^{13}\text{C NMR}$  (100 MHz,  $\text{CDCl}_3$ ):  $\delta$  158.0, 146.4, 146.3, 137.0, 136.2, 135.5, 132.6, 130.1, 129.4, 128.6, 128.5, 128.0, 126.3, 125.1, 123.5, 34.7, 27.7, 23.2, 23.2, 21.1, 19.1, 18.2; HRMS (ESI) calcd for  $\text{C}_{22}\text{H}_{24}\text{N}$  (M+H) $^+$  302.1903, found 302.1902.

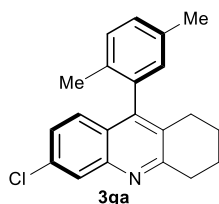

6-Chloro-9-(2,5-dimethylphenyl)-1,2,3,4-tetrahydroacridine **3ga** was obtained as a yellow solid in 78% yield (25.1 mg) and 95% ee. The ee value was determined by chiral stationary phase HPLC analysis [Daicel Chiralpak AD-H, isopropanol/hexane (03:97), 1.0 mL/min,  $\lambda = 254$  nm,  $t_r$  (minor) = 7.24 min,  $t_r$  (major) = 9.42 min]. m.p. 129-130 °C;  $[\alpha]_D^{25} = +22.86$  (c = 1.0, EtOAc);  $^1\text{H NMR}$  (400 MHz,  $\text{CDCl}_3$ ):  $\delta$  8.02 (d,  $J = 2.0$  Hz, 1H), 7.28-7.21 (m, 2H), 7.20-7.16 (m, 1H), 7.14 (d,  $J = 8.8$  Hz, 1H), 6.85 (s, 1H), 3.18 (t,  $J = 6.8$  Hz, 2H), 2.64-2.53 (m, 1H), 2.43-2.37 (m, 1H), 2.36 (s, 3H), 2.00-1.92 (m, 2H), 1.85 (s, 3H), 1.83-1.72 (m, 2H);  $^{13}\text{C NMR}$  (100 MHz,  $\text{CDCl}_3$ ):  $\delta$  160.5, 146.7, 146.5, 136.9, 135.7, 134.2, 132.5, 130.3, 129.2, 129.0, 128.8, 127.4, 126.9, 126.4, 124.9, 34.3, 27.6, 22.9, 21.0, 19.0; HRMS (ESI) calcd for  $\text{C}_{21}\text{H}_{21}\text{ClN}$  (M+H) $^+$  322.1357, found 322.1356.

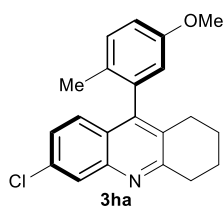

6-Chloro-9-(5-methoxy-2-methylphenyl)-1,2,3,4-tetrahydroacridine **3ha** was obtained as a yellow solid in 64% yield (21.6 mg) and 94% ee. The ee value was determined by chiral stationary phase HPLC analysis [Daicel Chiralpak AD-H, isopropanol/hexane (10:90), 1.0 mL/min,  $\lambda = 254$  nm,  $t_r$  (minor) = 5.66 min,  $t_r$  (major) = 8.51 min]. m.p. 131-132 °C;  $[\alpha]_D^{25} = +33.33$  (c = 1.0, EtOAc);  $^1\text{H NMR}$  (400 MHz,  $\text{CDCl}_3$ ):  $\delta$  8.02 (d,  $J = 2.0$  Hz, 1H), 7.31-7.22 (m, 2H), 7.17 (d,  $J = 9.2$  Hz, 1H), 6.92 (dd,  $J = 8.4, 2.8$  Hz, 1H), 6.62 (d,  $J = 2.8$  Hz, 1H),

3.79 (s, 3H), 3.18 (t,  $J = 6.8$  Hz, 2H), 2.69-2.55 (m, 1H), 2.48-2.35 (m, 1H), 2.04-1.91 (m, 2H), 1.88-1.72 (m, 5H);  $^{13}\text{C}$  NMR (100 MHz,  $\text{CDCl}_3$ ):  $\delta$  160.5, 158.0, 146.7, 146.1, 137.0, 134.2, 131.4, 128.8, 127.5, 127.4, 126.9, 126.5, 124.7, 114.1, 113.7, 55.3, 34.2, 27.5, 22.9, 22.8, 18.5; HRMS (ESI) calcd for  $\text{C}_{21}\text{H}_{21}\text{ClNO}$  ( $\text{M}+\text{H}$ ) $^+$  338.1306, found 338.1305.

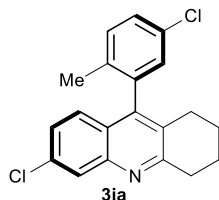

6-Chloro-9-(5-chloro-2-methylphenyl)-1,2,3,4-tetrahydroacridine **3ia** was obtained as a white solid in 80% yield (27.3 mg) and 94% ee. The ee value was determined by chiral stationary phase HPLC analysis [Daicel Chiralpak AD-H, isopropanol/hexane (05:95), 1.0 mL/min,  $\lambda = 254$  nm,  $t_r$  (minor) = 7.05 min,  $t_r$  (major) = 8.42 min]. m.p. 107-108 °C;  $[\alpha]_{\text{D}}^{25} = +27.75$  ( $c = 1.0$ , EtOAc);  $^1\text{H}$  NMR (400 MHz,  $\text{CDCl}_3$ ):  $\delta$  8.03 (d,  $J = 2.0$  Hz, 1H), 7.38-7.34 (m, 1H), 7.33-7.24 (m, 2H), 7.14-7.03 (m, 2H), 3.18 (t,  $J = 6.8$  Hz, 2H), 2.65-2.53 (m, 1H), 2.42-2.30 (m, 1H), 2.01-1.93 (m, 2H), 1.86 (s, 3H), 1.85-1.74 (m, 2H);  $^{13}\text{C}$  NMR (100 MHz,  $\text{CDCl}_3$ ):  $\delta$  160.6, 146.7, 144.7, 137.8, 134.4, 134.3, 132.0, 131.8, 128.8, 128.6, 128.4, 127.6, 126.8, 126.4, 124.4, 34.2, 27.6, 22.8, 18.9; HRMS (ESI) calcd for  $\text{C}_{20}\text{H}_{18}\text{Cl}_2\text{N}$  ( $\text{M}+\text{H}$ ) $^+$  342.0811, found 342.0810.

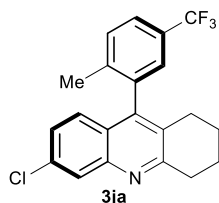

6-Chloro-9-(2-methyl-5-(trifluoromethyl)phenyl)-1,2,3,4-tetrahydroacridine **3ja** was obtained as a yellow solid in 76% yield (28.5 mg) and 91% ee. The ee value was determined by chiral stationary phase HPLC analysis [Daicel Chiralpak AD-H, isopropanol/hexane (08:92), 1.0 mL/min,  $\lambda = 254$  nm,  $t_r$  (major) = 4.63 min,  $t_r$  (minor) = 5.04 min]. m.p. 149-150 °C;  $[\alpha]_{\text{D}}^{25} = -15.57$  ( $c = 1.0$ , EtOAc);  $^1\text{H}$  NMR (400 MHz,  $\text{CDCl}_3$ ):  $\delta$  8.04 (d,  $J = 2.0$  Hz, 1H), 7.65 (d,  $J = 8.0$  Hz, 1H), 7.51 (d,  $J = 8.0$  Hz, 1H), 7.35 (s, 1H), 7.28 (dd,  $J = 8.4, 2.0$  Hz, 1H), 7.04 (d,  $J = 9.2$  Hz, 1H), 3.20 (t,  $J = 6.8$  Hz, 2H), 2.62-2.50 (m, 1H), 2.41-2.28 (m, 1H), 2.04-1.93 (m, 5H), 1.90-1.72 (m, 2H);  $^{13}\text{C}$  NMR (100 MHz,  $\text{CDCl}_3$ ):  $\delta$  160.7, 146.7, 144.5, 140.2, 136.8, 134.5, 131.0, 129.0 (q,  $J = 32.4$  Hz), 128.8, 127.7, 126.9, 126.2, 125.7 (q,  $J = 3.7$  Hz), 125.2 (q,  $J = 3.7$  Hz), 124.3, 124.1 (q,  $J = 270.4$  Hz), 34.2, 27.6, 22.8, 22.7, 19.5; HRMS (ESI) calcd for  $\text{C}_{21}\text{H}_{18}\text{ClF}_3\text{N}$  ( $\text{M}+\text{H}$ ) $^+$  376.1074, found 376.1073.

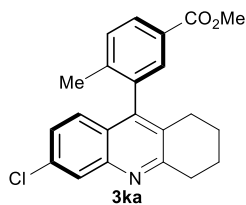

Methyl 3-(6-chloro-1,2,3,4-tetrahydroacridin-9-yl)-4-methylbenzoate **3ka** was obtained as a yellow solid in 62% yield (22.6 mg) and 95% ee. The ee value was determined by chiral stationary phase HPLC analysis [Daicel Chiralpak AD-H, isopropanol/hexane (15:85), 1.0 mL/min,  $\lambda = 254$  nm,  $t_r$  (minor) = 7.69 min,  $t_r$  (major) = 13.74 min]. m.p. 162-163 °C;  $[\alpha]_D^{25} = +35.16$  ( $c = 1.0$ , EtOAc);  $^1\text{H NMR}$  (400 MHz,  $\text{CDCl}_3$ ):  $\delta$  8.11-8.00 (m, 2H), 7.77 (d,  $J = 2.0$  Hz, 1H), 7.46 (d,  $J = 8.0$  Hz, 1H), 7.26 (dd,  $J = 8.8, 2.0$  Hz, 1H), 7.06 (d,  $J = 8.8$  Hz, 1H), 3.90 (s, 3H), 3.20 (t,  $J = 6.8$  Hz, 2H), 2.65-2.51 (m, 1H), 2.41-2.29 (m, 1H), 2.04-1.93 (m, 5H), 1.90-1.72 (m, 2H);  $^{13}\text{C NMR}$  (100 MHz,  $\text{CDCl}_3$ ):  $\delta$  166.7, 160.6, 146.7, 145.0, 141.5, 136.4, 134.4, 130.7, 130.1, 129.5, 128.9, 128.5, 127.6, 126.8, 126.4, 124.5, 52.2, 34.2, 27.6, 22.8, 22.8, 19.7; HRMS (ESI) calcd for  $\text{C}_{22}\text{H}_{21}\text{ClNO}_2$  ( $\text{M}+\text{H}$ ) $^+$  366.1255, found 366.1254.

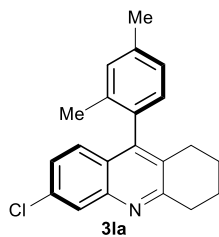

6-Chloro-9-(2,4-dimethylphenyl)-1,2,3,4-tetrahydroacridine **3la** was obtained as a yellow solid in 66% yield (21.2 mg) and 94% ee. The ee value was determined by chiral stationary phase HPLC analysis [Daicel Chiralpak IC, isopropanol/hexane (07:93), 1.0 mL/min,  $\lambda = 254$  nm,  $t_r$  (minor) = 5.51 min,  $t_r$  (major) = 6.04 min]. m.p. 95-96 °C;  $[\alpha]_D^{25} = +20.14$  ( $c = 1.0$ , EtOAc);  $^1\text{H NMR}$  (400 MHz,  $\text{CDCl}_3$ ):  $\delta$  8.02 (d,  $J = 2.0$  Hz, 1H), 7.22 (dd,  $J = 8.8, 2.0$  Hz, 1H), 7.18 (s, 1H), 7.14-7.10 (m, 2H), 6.92 (d,  $J = 7.6$  Hz, 1H), 3.18 (t,  $J = 6.8$  Hz, 2H), 2.64-2.53 (m, 1H), 2.42 (s, 3H), 2.41-2.34 (m, 1H), 2.00-1.92 (m, 2H), 1.86 (s, 3H), 1.84-1.72 (m, 2H);  $^{13}\text{C NMR}$  (100 MHz,  $\text{CDCl}_3$ ):  $\delta$  160.5, 146.7, 146.4, 137.9, 135.4, 134.2, 133.0, 131.1, 129.1, 128.7, 127.4, 127.0, 126.9, 126.4, 125.1, 34.3, 27.6, 22.9, 21.3, 19.4; HRMS (ESI) calcd for  $\text{C}_{21}\text{H}_{21}\text{ClN}$  ( $\text{M}+\text{H}$ ) $^+$  322.1357, found 322.1356.

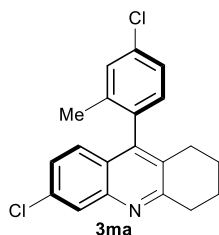

6-Chloro-9-(4-chloro-2-methylphenyl)-1,2,3,4-tetrahydroacridine **3ma** was obtained as a yellow solid in 70% yield (23.9 mg) and 94% ee. The ee value was determined by chiral stationary phase HPLC analysis [Daicel Chiralpak AD-H, isopropanol/hexane (03:97), 1.0 mL/min,  $\lambda = 254$  nm,  $t_r$  (minor) = 4.82 min,  $t_r$  (major) = 6.70 min]. m.p. 115-116 °C;  $[\alpha]_D^{25} = +27.50$  (c = 1.0, EtOAc);  $^1\text{H NMR}$  (400 MHz,  $\text{CDCl}_3$ ):  $\delta$  8.02 (d,  $J = 2.0$  Hz, 1H), 7.38 (d,  $J = 2.4$  Hz, 1H), 7.32 (dd,  $J = 8.0, 2.0$  Hz, 1H), 7.26 (dd,  $J = 8.8, 2.0$  Hz, 1H), 7.10 (d,  $J = 8.8$  Hz, 1H), 6.99 (d,  $J = 8.0$  Hz, 1H), 3.18 (t,  $J = 6.8$  Hz, 2H), 2.61-2.50 (m, 1H), 2.41-2.31 (m, 1H), 2.02-1.93 (m, 2H), 1.89 (s, 3H), 1.86-1.74 (m, 2H);  $^{13}\text{C NMR}$  (100 MHz,  $\text{CDCl}_3$ ):  $\delta$  160.6, 146.7, 145.0, 137.8, 134.5, 134.4, 134.0, 130.4, 130.1, 129.0, 127.6, 126.7, 126.6, 126.4, 124.6, 34.2, 27.6, 22.8, 19.4; HRMS (ESI) calcd for  $\text{C}_{20}\text{H}_{18}\text{Cl}_2\text{N}$  (M+H) $^+$  342.0811, found 342.0810.

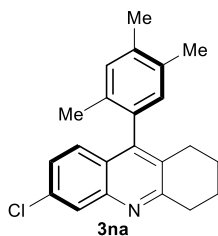

6-Chloro-9-(2,4,5-trimethylphenyl)-1,2,3,4-tetrahydroacridine **3na** was obtained as a yellow solid in 81% yield (27.2 mg) and 93% ee. The ee value was determined by chiral stationary phase HPLC analysis [Daicel Chiralpak AD-H, isopropanol/hexane (05:95), 1.0 mL/min,  $\lambda = 254$  nm,  $t_r$  (minor) = 4.58 min,  $t_r$  (major) = 6.43 min]. m.p. 129-130 °C;  $[\alpha]_D^{25} = +33.75$  (c = 1.0, EtOAc);  $^1\text{H NMR}$  (400 MHz,  $\text{CDCl}_3$ ):  $\delta$  8.01 (d,  $J = 2.0$  Hz, 1H), 7.23 (dd,  $J = 8.8, 2.0$  Hz, 1H), 7.18-7.10 (m, 2H), 6.80 (s, 1H), 3.18 (t,  $J = 6.8$  Hz, 2H), 2.65-2.54 (m, 1H), 2.44-2.35 (m, 1H), 2.33 (s, 3H), 2.27 (s, 3H), 2.00-1.91 (m, 2H), 1.85-1.71 (m, 5H);  $^{13}\text{C NMR}$  (100 MHz,  $\text{CDCl}_3$ ):  $\delta$  160.5, 146.7, 146.6, 136.5, 134.3, 134.1, 133.3, 132.8, 131.6, 129.8, 129.0, 127.3, 127.1, 126.3, 125.1, 34.3, 27.7, 22.9, 19.6, 19.4, 18.9; HRMS (ESI) calcd for  $\text{C}_{22}\text{H}_{23}\text{ClN}$  (M+H) $^+$  336.1514, found 336.1512.

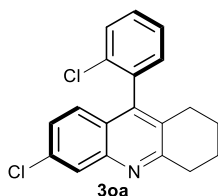

6-Chloro-9-(2-chlorophenyl)-1,2,3,4-tetrahydroacridine **3oa** was obtained as a yellow solid in 71% yield (23.2 mg) and 80% ee. The ee value was determined by chiral stationary phase HPLC analysis [Daicel Chiralpak AD-H, isopropanol/hexane (10:90), 1.0 mL/min,  $\lambda = 254$  nm,  $t_r$  (minor) = 5.61 min,  $t_r$  (major) = 8.46 min]. m.p. 139-140 °C;  $[\alpha]_D^{25} = +13.17$  (c = 1.0, EtOAc);  $^1\text{H NMR}$  (400 MHz,  $\text{CDCl}_3$ ):  $\delta$  8.03 (d,  $J = 2.0$  Hz, 1H), 7.59-7.53 (m, 1H),



7.47-7.38 (m, 2H), 7.26 (dd,  $J = 8.8, 2.0$  Hz, 1H), 7.19-7.14 (m, 1H), 7.11 (d,  $J = 8.8$  Hz, 1H), 3.27-3.10 (m, 2H), 2.63-2.45 (m, 2H), 2.05-1.91 (m, 2H), 1.88-1.75 (m, 2H);  $^{13}\text{C}$  NMR (100 MHz,  $\text{CDCl}_3$ ):  $\delta$  160.5, 146.7, 143.7, 135.5, 134.3, 133.2, 130.6, 130.0, 129.7, 129.3, 127.5, 127.2, 126.7, 126.5, 124.5, 34.2, 27.4, 22.8, 22.7; HRMS (ESI) calcd for  $\text{C}_{19}\text{H}_{16}\text{Cl}_2\text{N}(\text{M}+\text{H})^+$  328.0654, found 328.0653.

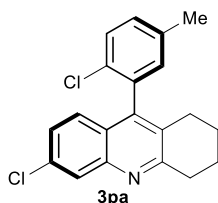

6-Chloro-9-(2-chloro-5-methylphenyl)-1,2,3,4-tetrahydroacridine **3pa** was obtained as a yellow solid in 72% yield (24.6 mg) and 86% ee. The ee value was determined by chiral stationary phase HPLC analysis [Daicel Chiralpak AD-H, isopropanol/hexane (05:95), 1.0 mL/min,  $\lambda = 254$  nm,  $t_r$  (minor) = 8.45 min,  $t_r$  (major) = 10.16 min]. m.p. 150-151 °C;  $[\alpha]_{\text{D}}^{25} = +38.42$  ( $c = 1.0$ , EtOAc);  $^1\text{H}$  NMR (400 MHz,  $\text{CDCl}_3$ ):  $\delta$  8.03 (d,  $J = 2.0$  Hz, 1H), 7.44 (d,  $J = 8.4$  Hz, 1H), 7.31-7.20 (m, 2H), 7.13 (d,  $J = 8.8$  Hz, 1H), 6.97 (d,  $J = 2.4$  Hz, 1H), 3.25-3.11 (m, 2H), 2.54 (t,  $J = 6.4$  Hz, 2H), 2.39 (s, 3H), 2.03-1.92 (m, 2H), 1.86-1.76 (m, 2H);  $^{13}\text{C}$  NMR (100 MHz,  $\text{CDCl}_3$ ):  $\delta$  160.5, 146.6, 143.9, 137.2, 135.1, 134.3, 131.0, 130.5, 130.1, 129.6, 129.3, 127.5, 126.6, 126.6, 124.6, 34.2, 27.4, 22.8, 22.7, 20.9; HRMS (ESI) calcd for  $\text{C}_{20}\text{H}_{18}\text{Cl}_2\text{N}(\text{M}+\text{H})^+$  342.0811, found 342.0810.

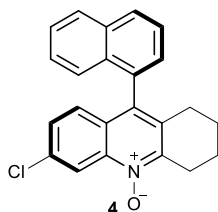

6-Chloro-9-(naphthalen-1-yl)-1,2,3,4-tetrahydroacridine 10-oxide **4** was obtained as a white solid in 94% yield (33.8 mg) and 87% ee. The ee value was determined by chiral stationary phase HPLC analysis [Daicel Chiralpak AD-H, isopropanol/hexane (30:70), 1.0 mL/min,  $\lambda = 254$  nm,  $t_r$  (minor) = 14.87 min,  $t_r$  (major) = 18.22 min]. m.p. 91-92 °C;  $[\alpha]_{\text{D}}^{25} = +17.78$  ( $c = 1.0$ , EtOAc);  $^1\text{H}$  NMR (400 MHz,  $\text{CDCl}_3$ ):  $\delta$  8.88 (d,  $J = 2.4$  Hz, 1H), 8.05-7.94 (m, 2H), 7.64 (t,  $J = 7.2$  Hz, 1H), 7.53 (t,  $J = 7.2$  Hz, 1H), 7.38-7.31 (m, 2H), 7.27 (dd,  $J = 8.8, 2.0$  Hz, 1H), 7.17 (d,  $J = 8.4$  Hz, 1H), 7.10 (d,  $J = 8.8$  Hz, 1H), 3.34 (t,  $J = 6.8$  Hz, 2H), 2.59-2.47 (m, 1H), 2.36-2.25 (m, 1H), 2.01-1.90 (m, 2H), 1.75-1.60 (m, 2H);  $^{13}\text{C}$  NMR (100 MHz,  $\text{CDCl}_3$ ):  $\delta$  147.3, 138.9, 135.1, 134.4, 132.7, 132.0, 130.7, 130.5, 128.0, 127.7, 127.6, 127.0, 126.6, 126.0, 125.9, 125.4, 124.6, 123.9, 117.8, 26.6, 25.7, 20.8, 20.6; HRMS (ESI) calcd for

$C_{23}H_{19}ClNO$  ( $M+H$ )<sup>+</sup> 360.1150, found 360.1149.

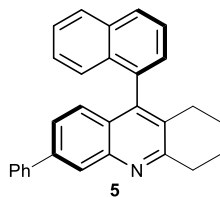

9-(Naphthalen-1-yl)-6-phenyl-1,2,3,4-tetrahydroacridine **5** was obtained as a yellow oil in 84% yield (32.4 mg) and 88% ee. The ee value was determined by chiral stationary phase HPLC analysis [Daicel Chiralpak OD-H, isopropanol/hexane (03:97), 1.0 mL/min,  $\lambda = 254$  nm,  $t_r$  (major) = 11.11 min,  $t_r$  (minor) = 12.35 min].  $[\alpha]_D^{25} = -41.50$  ( $c = 1.0$ , EtOAc);  $^1H$  NMR (400 MHz,  $CDCl_3$ ):  $\delta$  8.35 (s, 1H), 7.97 (t,  $J = 7.6$  Hz, 2H), 7.71 (d,  $J = 7.6$  Hz, 2H), 7.62 (t,  $J = 7.6$  Hz, 1H), 7.53-7.40 (m, 4H), 7.38-7.27 (m, 3H), 7.23-7.11 (m, 2H), 3.29 (t,  $J = 6.8$  Hz, 2H), 2.64-2.50 (m, 1H), 2.41-2.29 (m, 1H), 2.03-1.90 (m, 2H), 1.81-1.64 (m, 2H);  $^{13}C$  NMR (100 MHz,  $CDCl_3$ ):  $\delta$  159.55, 146.41, 145.04, 141.17, 140.38, 134.64, 133.65, 131.41, 129.68, 128.88, 128.48, 128.34, 127.63, 127.31, 126.85, 126.61, 126.37, 126.21, 125.83, 125.57, 125.35, 125.19, 34.16, 27.48, 22.89, 22.86; HRMS (ESI) calcd for  $C_{29}H_{24}N$  ( $M+H$ )<sup>+</sup> 386.1903, found 386.1925.

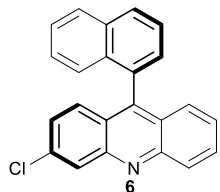

3-Chloro-9-(naphthalen-1-yl)acridine **6** was obtained as a yellow solid in 34% yield (11.5 mg) and 84% ee. The ee value was determined by chiral stationary phase HPLC analysis [Daicel Chiralpak AD-H, isopropanol/hexane (03:97), 1.0 mL/min,  $\lambda = 254$  nm,  $t_r$  (major) = 6.74 min,  $t_r$  (minor) = 7.14 min]. m.p. 213-214 °C;  $[\alpha]_D^{25} = +30.04$  ( $c = 1.0$ , EtOAc);  $^1H$  NMR (400 MHz,  $CDCl_3$ ):  $\delta$  8.38-8.24 (m, 2H), 8.10 (d,  $J = 8.4$  Hz, 1H), 8.03 (d,  $J = 8.4$  Hz, 1H), 7.79 (t,  $J = 7.6$  Hz, 1H), 7.70 (t,  $J = 7.6$  Hz, 1H), 7.56-7.47 (m, 2H), 7.47-7.31 (m, 3H), 7.30-7.19 (m, 2H), 6.99 (d,  $J = 8.4$  Hz, 1H);  $^{13}C$  NMR (100 MHz,  $CDCl_3$ ):  $\delta$  148.3, 147.7, 145.2, 135.2, 132.5, 132.0, 131.4, 129.9, 129.7, 128.5, 128.1, 127.8, 127.4, 127.0, 126.1, 126.0, 125.8, 125.4, 125.1, 125.0, 124.9, 124.3, 123.3; HRMS (ESI) calcd for  $C_{23}H_{15}ClN$  ( $M+H$ )<sup>+</sup> 340.0888, found 340.0887.

## References

- 1 (a) P. Wipf and J.-K. Jung, Formal Total Synthesis of (+)-Diepoxin  $\sigma$ , *J. Org. Chem.*, 2000, **65**, 6319; (b) H.-B. Yu, Q.-S. Hu and L. Pu, The First Optically Active BINOL–BINAP Copolymer Catalyst: Highly Stereoselective Tandem Asymmetric Reactions, *J. Am. Chem. Soc.*, 2000, **122**, 6500; (c) D. Uraguchi and M. Terada, Chiral Brønsted Acid-Catalyzed Direct Mannich Reactions via Electrophilic Activation, *J. Am. Chem. Soc.*, 2004, **126**, 5356.
- 2 (a) W. Song, X. Li, K. Yang, X. Zhao, D. A. Glazier, B. Xi and W. Tang, Synthesis of Carbazoles and Carbazole-Containing Heterocycles via Rhodium-Catalyzed Tandem Carbonylative Benzannulations, *J. Org. Chem.*, 2016, **81**, 2930; (b) X. Fan, L.-Z. Yu, Y. Wei and M. Shi, Cascade Amination/Cyclization/Aromatization Process for the Rapid Construction of [2,3-*c*]Dihydrocarbazoles and [2,3-*c*]Carbazoles, *Org. Lett.*, 2017, **19**, 4476.
- 3 (a) M. Aidene, F. Belkessam, J.-F. Soul and H. Doucet, Reactivity of 2,1-Benzisoxazole in Palladium-Catalyzed Direct Arylation with Aryl Bromides, *ChemCatChem*, 2016, **8**, 1583; (b) A. V. Butin, S. K. Smirnov, T. A. Stroganova, W. Benderb and G. D. Krapivina, Simple route to 3-(2-indolyl)-1-propanones via a furan recyclization reaction, *Tetrahedron*, 2007, **63**, 474.
- 4 Y.-D. Shao, M.-M. Dong, Y.-A. Wang, P.-M. Cheng, T. Wang and D.-J. Cheng, Organocatalytic Atroposelective Friedländer Quinoline Heteroannulation, *Org. Lett.*, 2019, **21**, 4831.
- 5 J. J. Hirner and M. J. Zacuto, 7-Chloroquinoline: a versatile intermediate for the synthesis of 7-substituted quinolines, *Tetrahedron Lett.*, 2009, **50**, 4989.

# <sup>1</sup>H and <sup>13</sup>C NMR Spectra

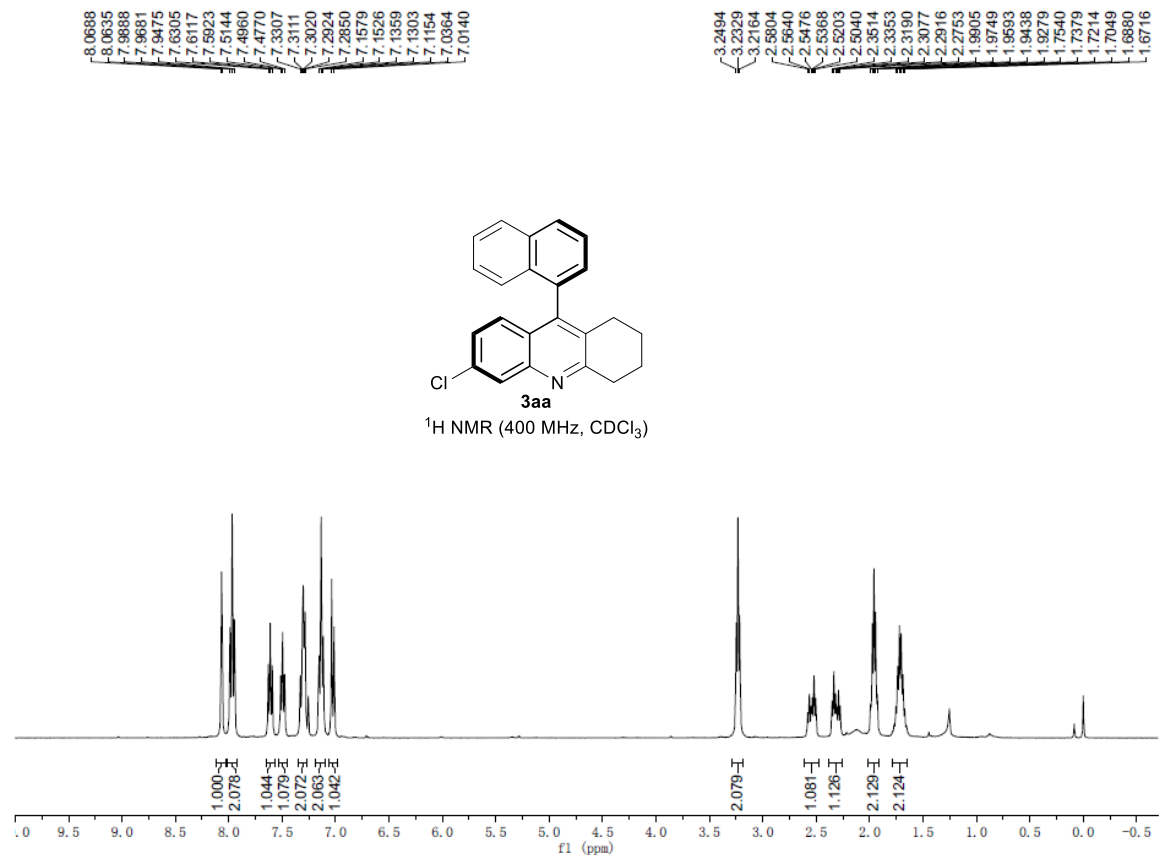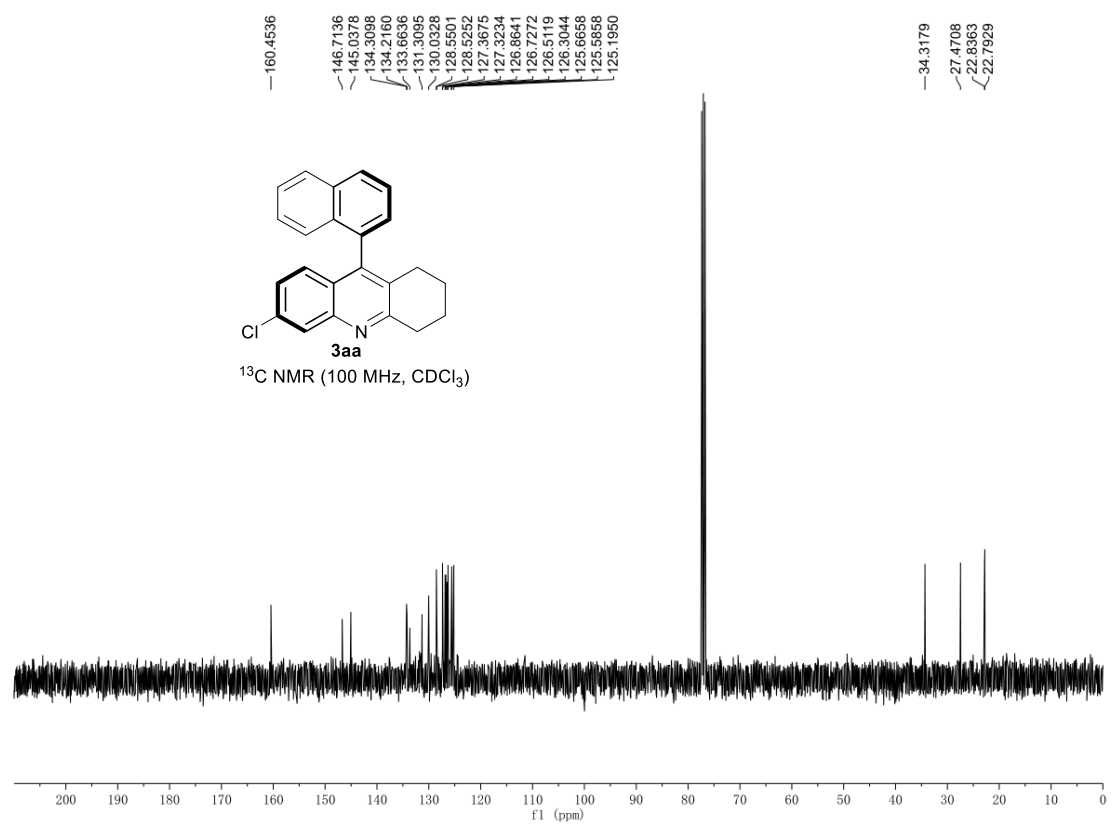

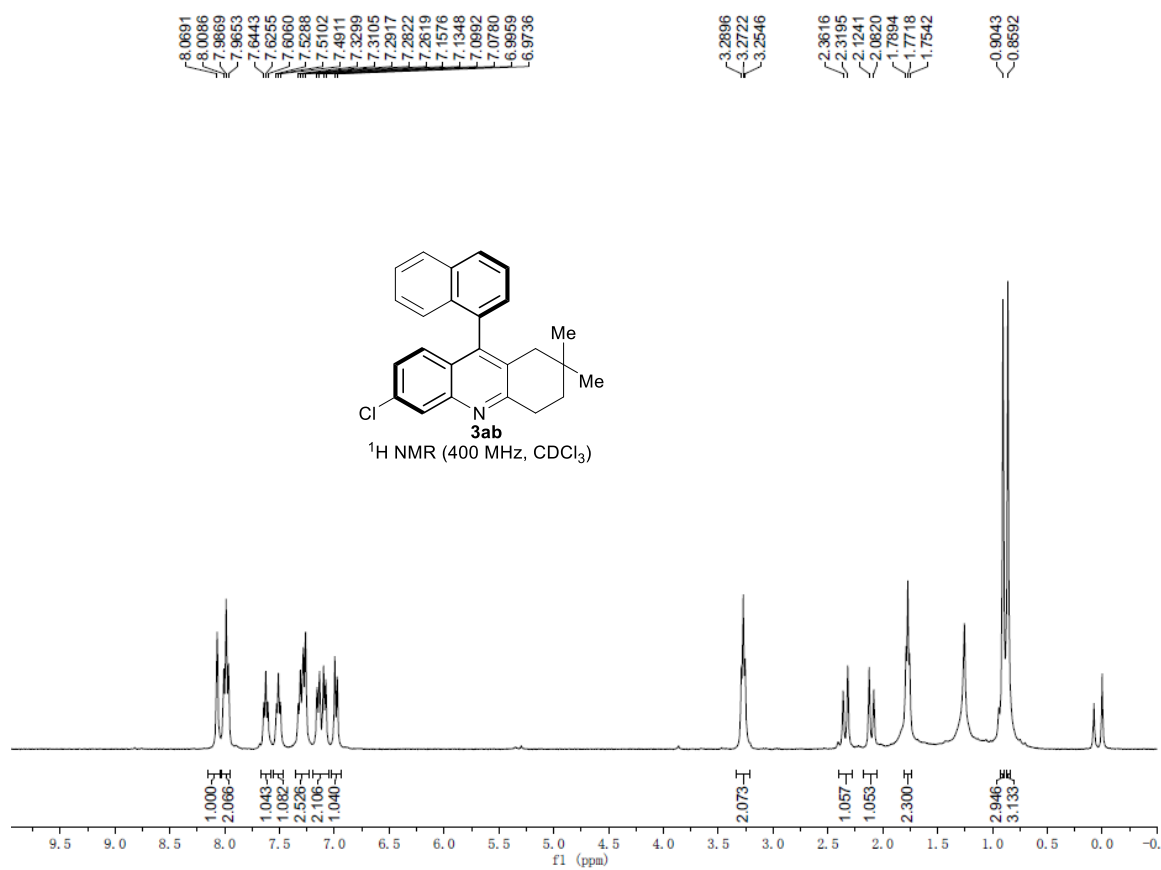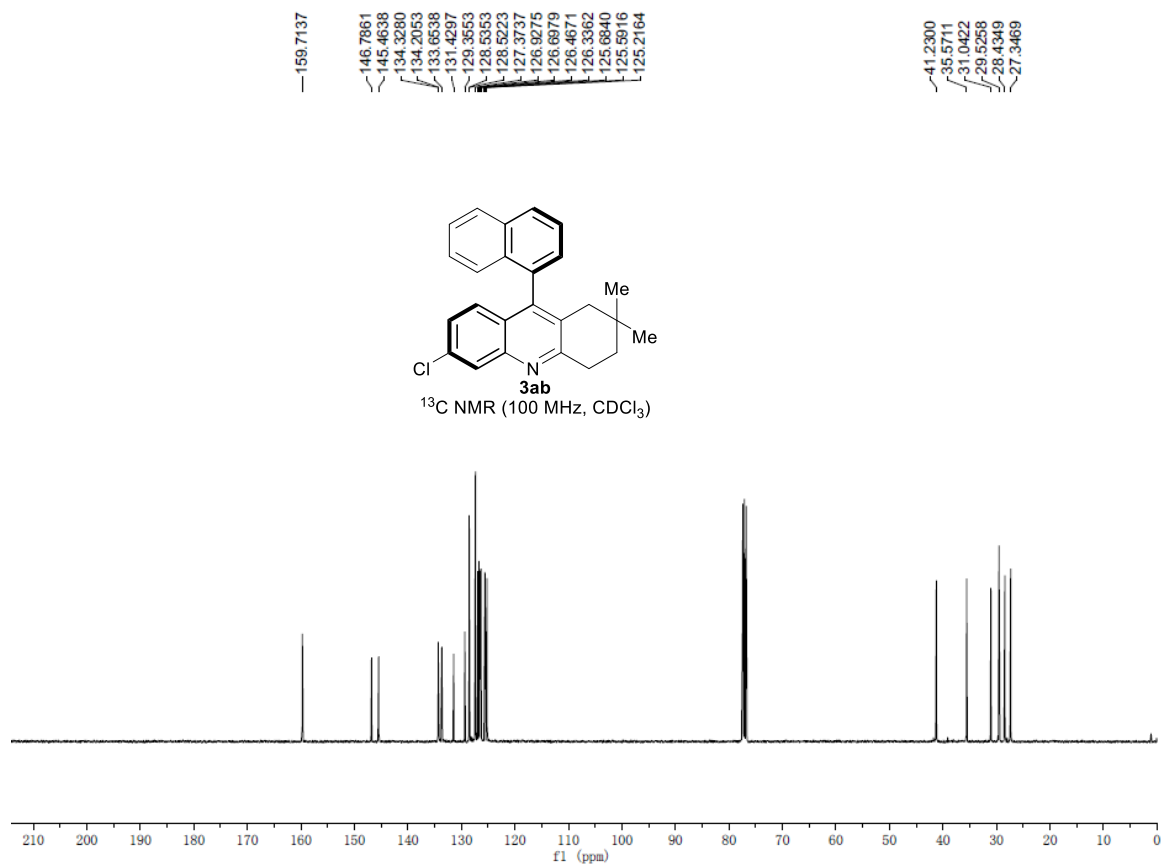

8.1613  
8.1560  
8.0285  
8.0078  
7.9864  
7.9658  
7.6412  
7.6239  
7.6204  
7.6031  
7.5454  
7.5423  
7.5282  
7.5248  
7.5215  
7.5075  
7.5045  
7.3680  
7.3645  
7.3507  
7.3470  
7.3433  
7.3296  
7.3263  
7.3206  
7.3176  
7.3030  
7.3000  
7.2531  
7.2480  
7.2306  
7.2256  
7.1278  
7.1047  
4.5787  
4.5391  
4.3279  
4.2880  
4.1357  
4.1217  
4.1094  
4.1066  
4.0935  
3.3761  
3.3609  
3.3460  
3.3314

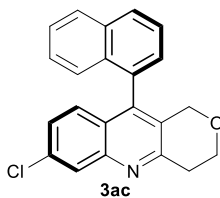

<sup>1</sup>H NMR (400 MHz, CDCl<sub>3</sub>)

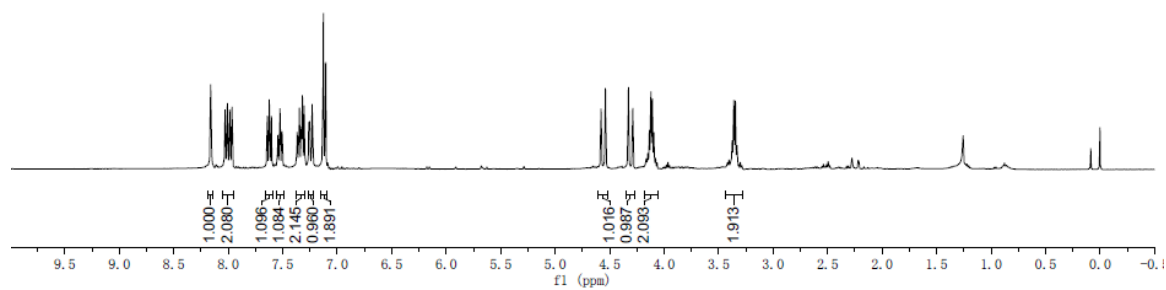

155.2566  
146.2047  
141.5422  
134.0222  
132.6443  
131.0039  
129.9358  
128.0772  
127.5770  
126.5453  
126.4376  
126.0563  
125.9805  
125.7592  
125.4698  
124.4718  
124.4394  
123.6703

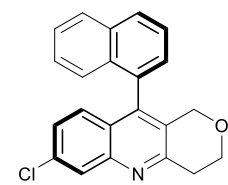

<sup>13</sup>C NMR (100 MHz, CDCl<sub>3</sub>)

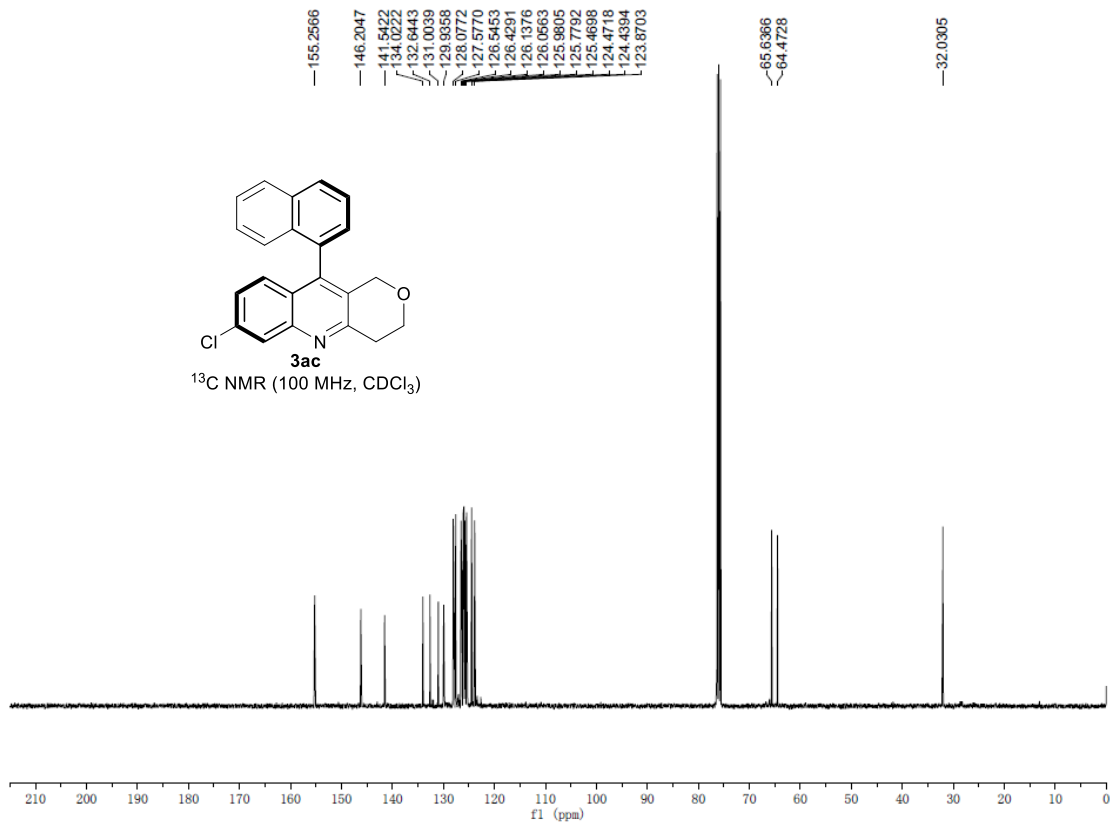

8.1111  
8.1058  
8.0203  
7.9994  
7.9816  
7.9609  
7.6422  
7.6248  
7.6215  
7.6040  
7.5362  
7.5331  
7.5191  
7.5158  
7.5123  
7.4984  
7.4954  
7.3680  
7.3645  
7.3602  
7.3506  
7.3472  
7.3426  
7.3390  
7.3254  
7.3221  
7.2301  
7.2248  
7.2077  
7.2023  
7.1735  
7.1524  
7.1128  
7.0904  
3.5396  
3.5015  
3.4880  
3.4716  
3.4081  
3.3688  
3.1508  
3.1355  
3.1205  
3.1095  
3.1056  
3.0917  
3.0888  
3.0761  
3.0627  
3.0457

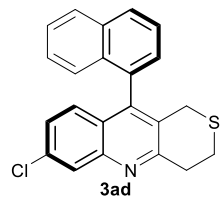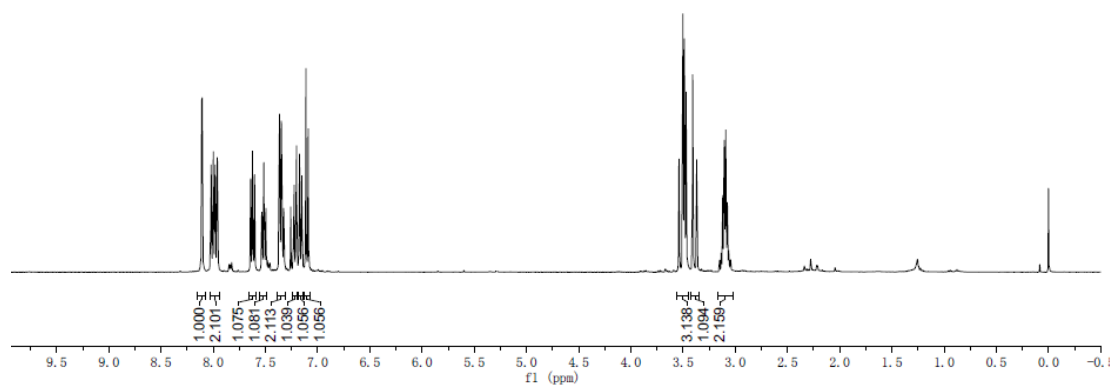

159.3518  
146.9645  
143.2624  
134.9873  
133.6141  
132.8955  
131.5633  
129.0633  
128.6928  
128.5951  
127.9373  
127.6279  
127.3325  
127.1860  
127.0102  
126.5342  
125.7720  
125.4873  
125.2652  
34.6907  
26.9513  
25.8074

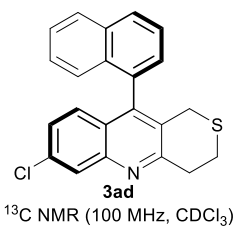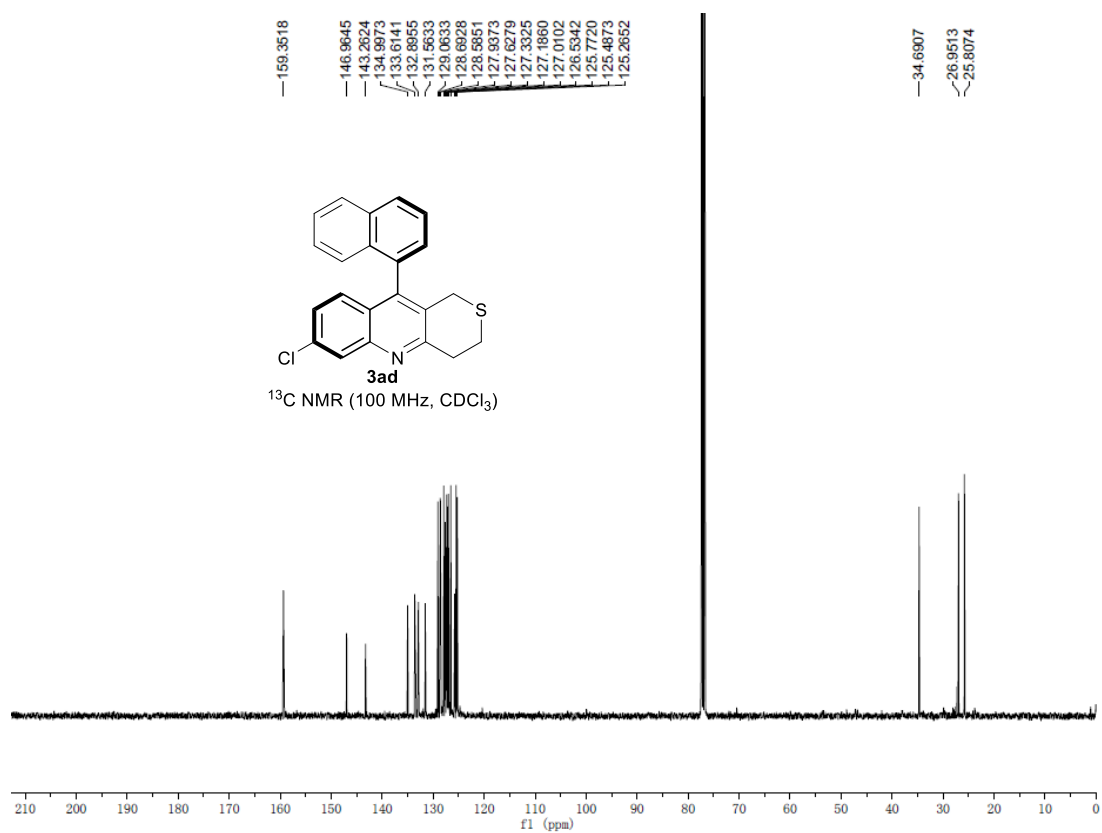

8.1156  
8.1101  
7.9863  
7.9658  
7.6244  
7.6077  
7.5037  
7.4866  
7.3327  
7.3286  
7.3174  
7.2519  
7.2445  
7.2373  
7.2060  
7.1870  
7.1733  
7.1680  
7.1508  
7.1454  
7.0867  
7.0642  
7.0215  
7.0146  
7.0067  
7.0004  
6.9877  
6.9814  
6.5955  
6.5816  
6.5754  
3.3926  
3.3794  
3.3663  
3.3549  
3.3414  
3.3414  
3.3061  
3.2926  
3.2789  
3.2658  
3.2546  
3.2412  
3.2276  
3.1013  
3.0894  
3.0643  
3.0532  
3.0376  
3.0275  
3.0149  
3.0010  
2.9920  
2.9779

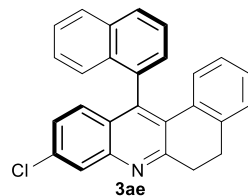

$^1\text{H NMR}$  (400 MHz,  $\text{CDCl}_3$ )

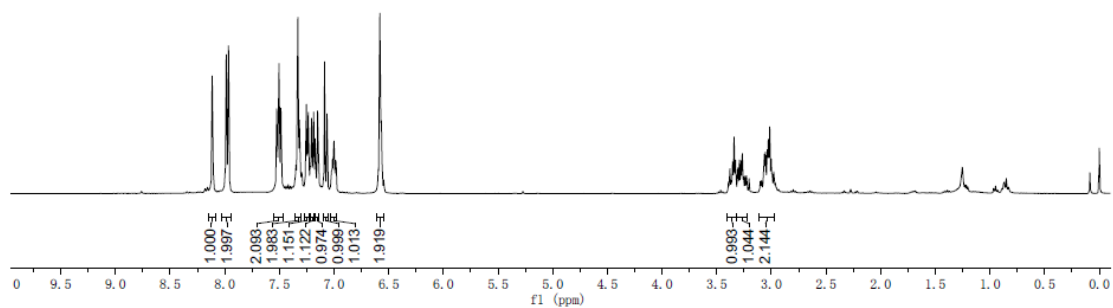

162.4504  
146.7214  
142.2388  
139.6422  
135.4140  
134.9647  
133.5756  
132.4975  
128.8413  
128.8021  
128.7291  
128.4313  
127.7914  
127.7877  
127.6815  
127.6623  
127.5973  
127.0177  
126.6728  
126.6218  
126.4057  
125.9727  
125.9667  
125.8031

34.8297  
29.2560

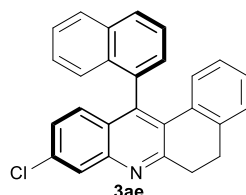

$^{13}\text{C NMR}$  (100 MHz,  $\text{CDCl}_3$ )

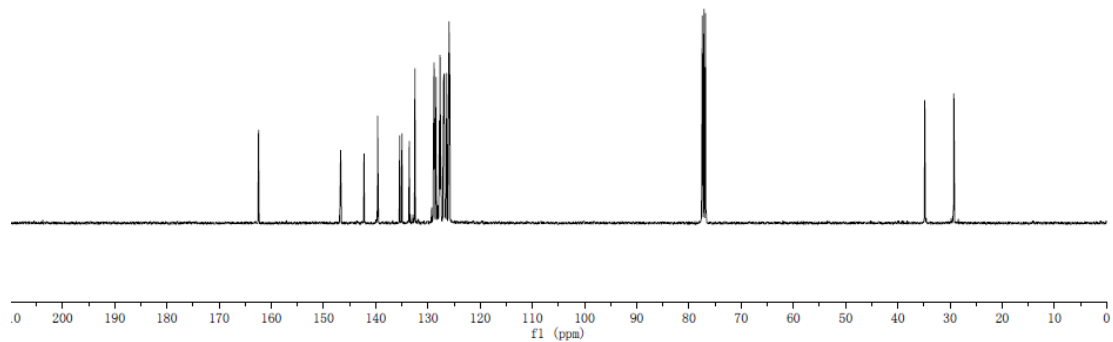



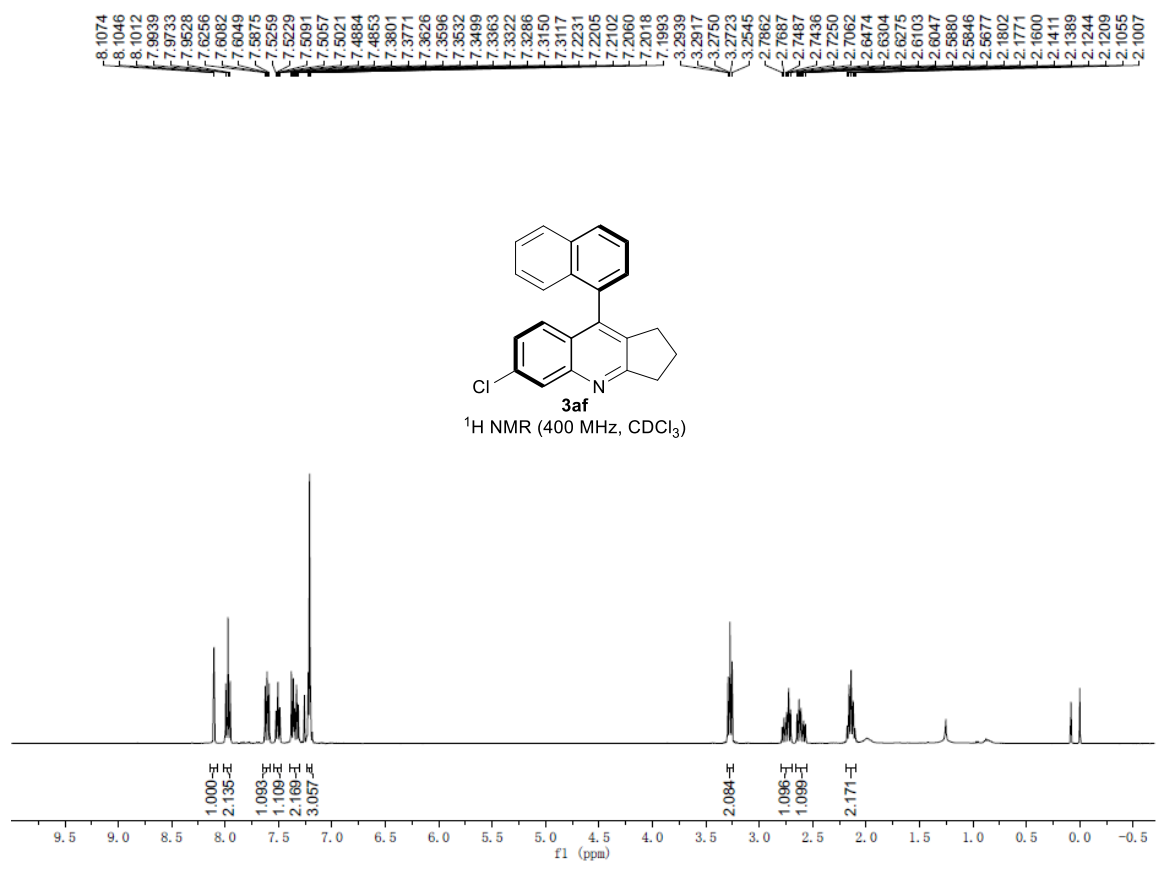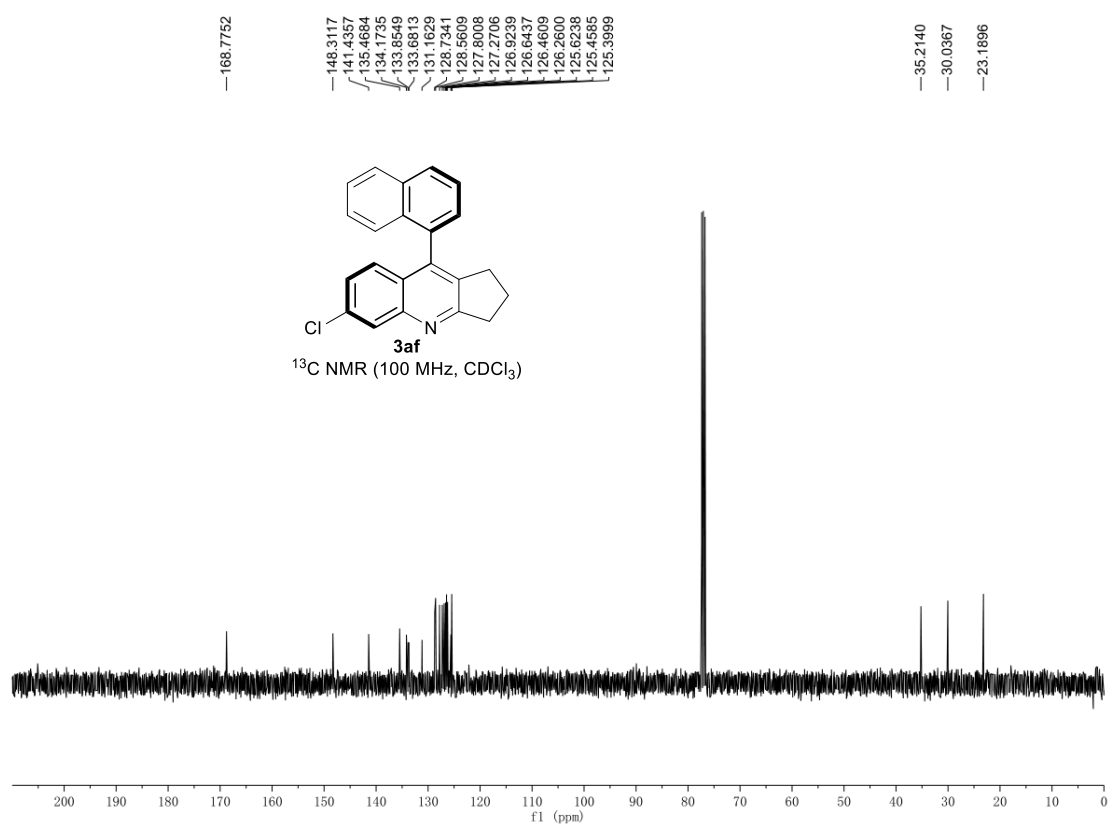

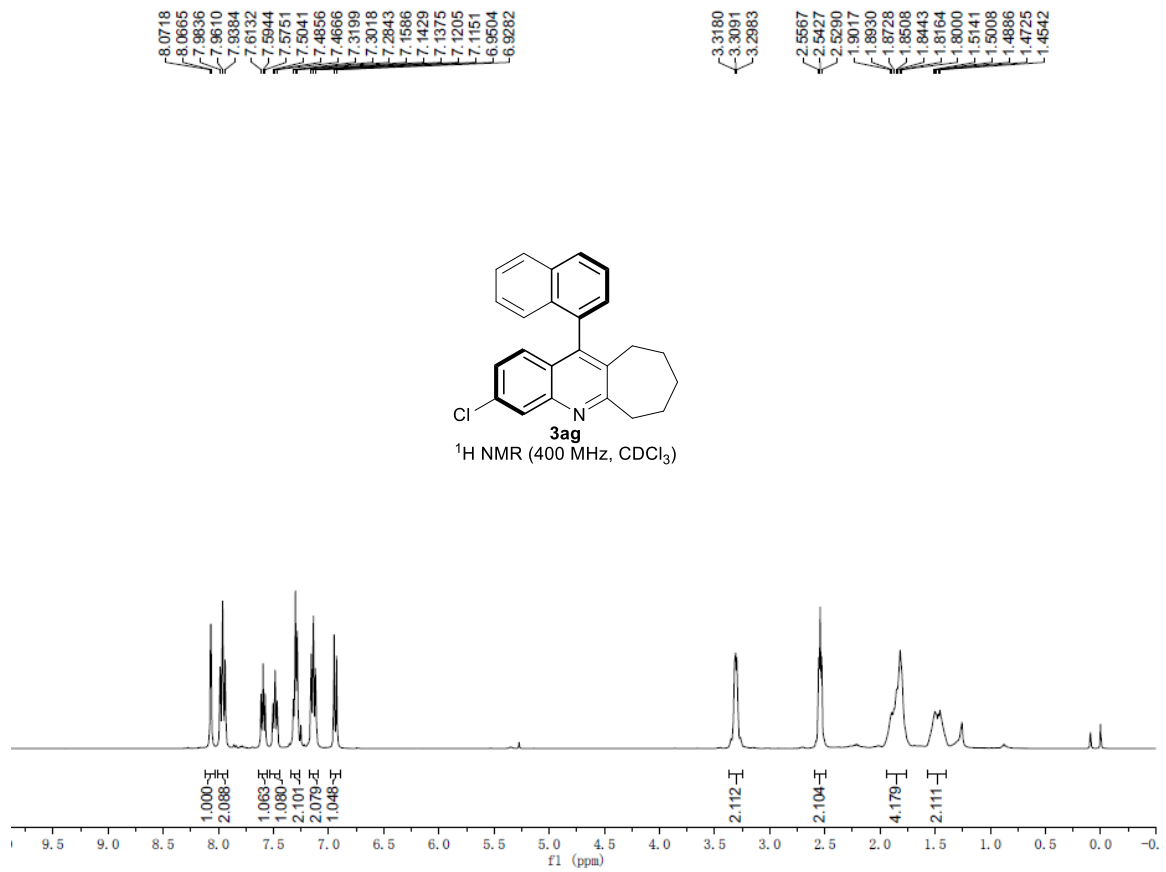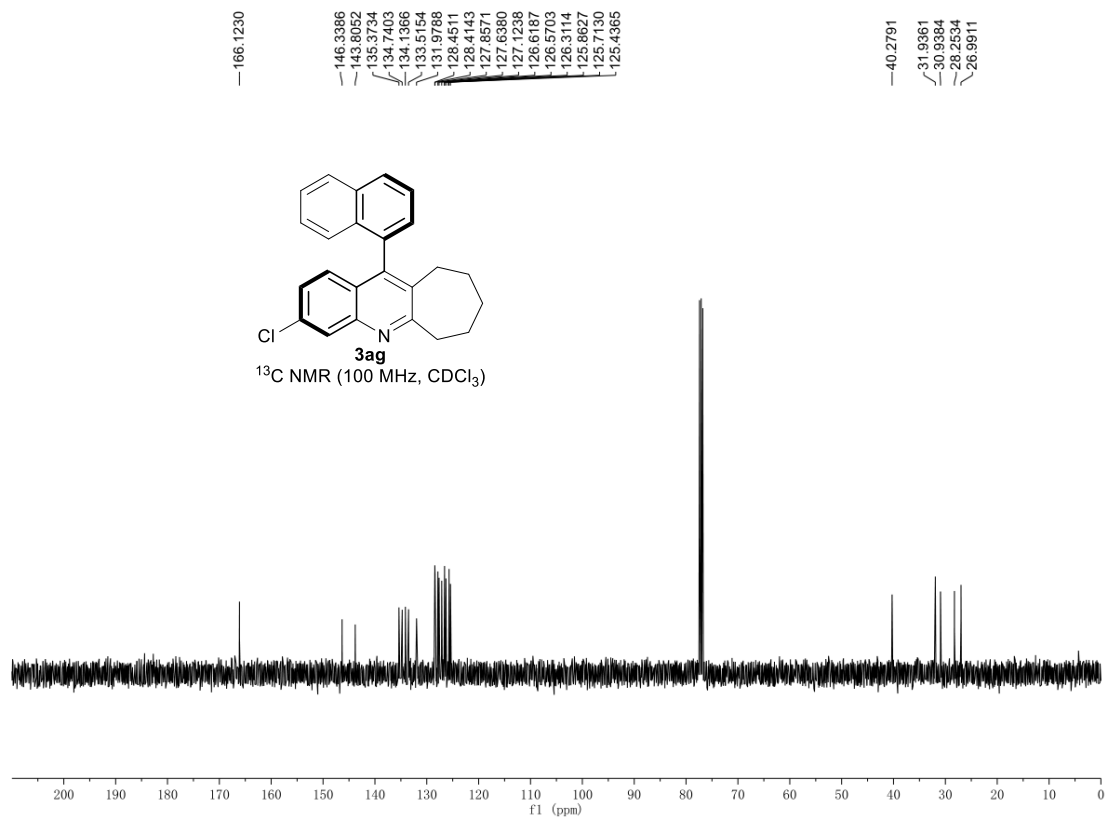

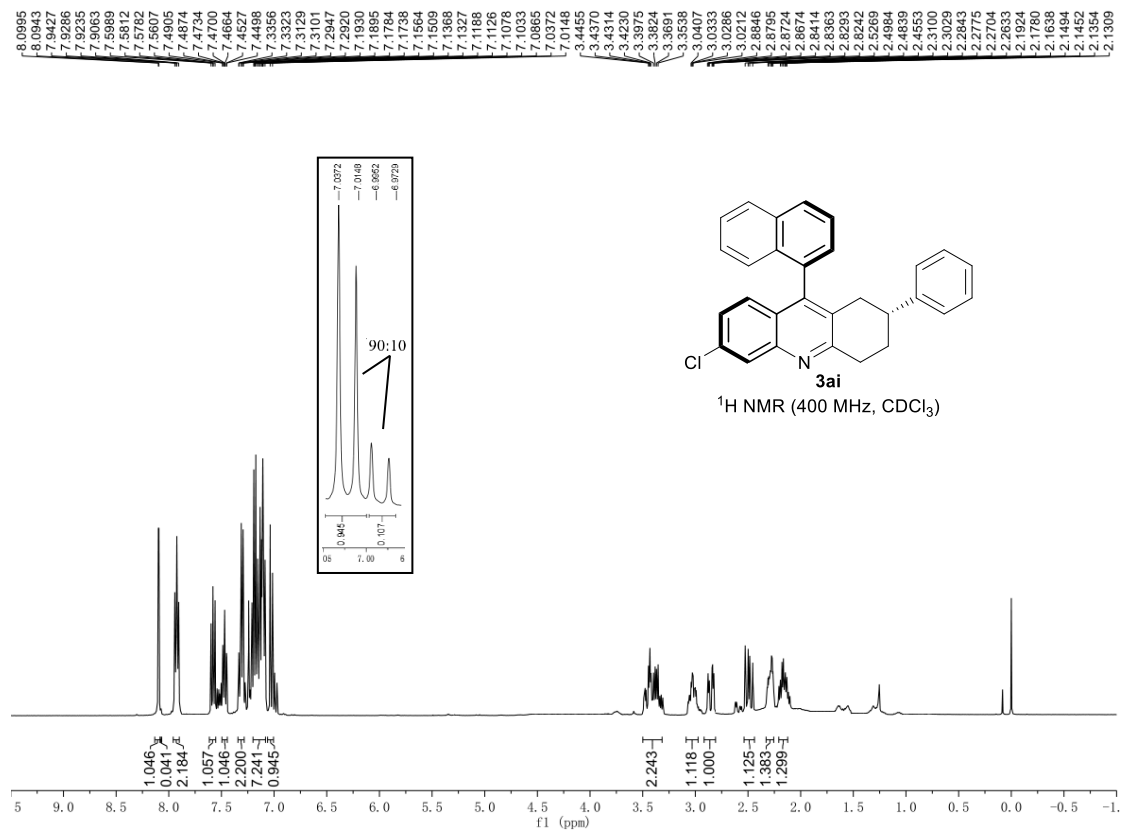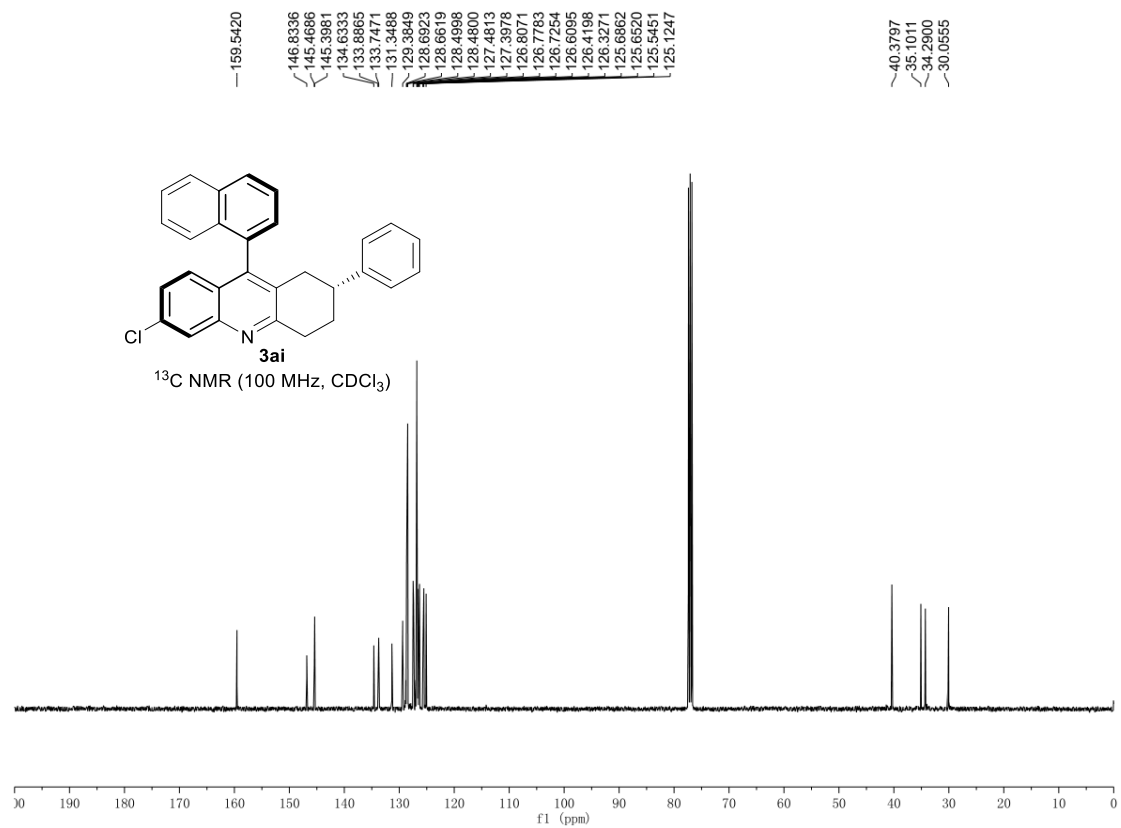

-8.0958  
 -8.0904  
 -7.9645  
 -7.9452  
 -7.9263  
 -7.6164  
 -7.5978  
 -7.5785  
 -7.5091  
 -7.4908  
 -7.4718  
 -7.3458  
 -7.3303  
 -7.3262  
 -7.3118  
 -7.2953  
 -7.1971  
 -7.1829  
 -7.1629  
 -7.1419  
 -7.1121  
 -7.0913  
 -7.0468  
 -7.0285  
 -7.0088  
 -6.4700  
 -6.4556  
 -6.4335  
 -6.4248  
 -6.4187  
 -6.4105  
 -6.4018  
 -6.3891  
 -6.3743  
 -6.3611  
 -6.3457  
 -6.3292  
 -6.3160  
 -6.3012  
 -6.30417  
 -6.0250  
 -6.0154  
 -6.0070  
 -2.9968  
 -2.9860  
 -2.9780  
 -2.8378  
 -2.8306  
 -2.7947  
 -2.7875  
 -2.7825  
 -2.4689  
 -2.4408  
 -2.4259  
 -2.3976  
 -2.2921  
 -2.2843  
 -2.2517  
 -2.2441  
 -2.1737  
 -2.1596  
 -2.1448  
 -2.1307  
 -2.1171  
 -2.1127  
 -2.0879

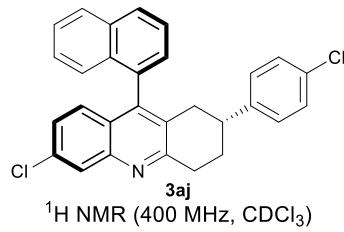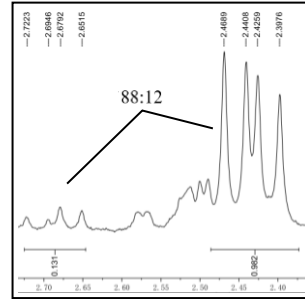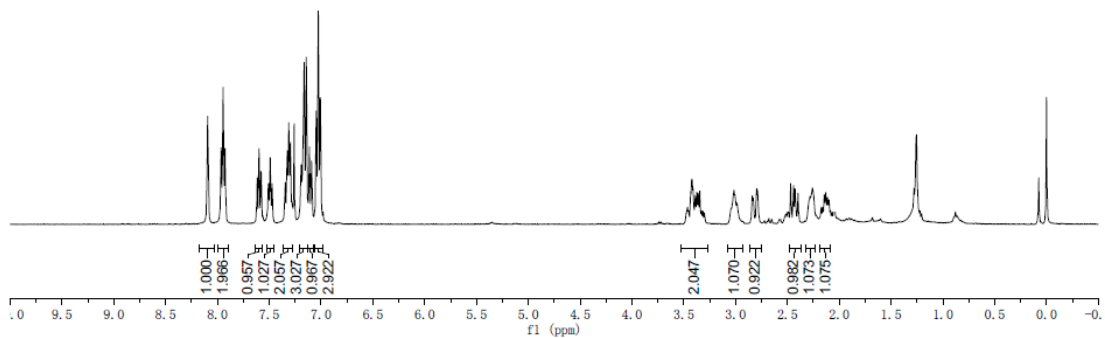

-159.2363  
 -146.8714  
 -145.3975  
 -143.6965  
 -134.6392  
 -133.7338  
 -133.6793  
 -131.9809  
 -131.2437  
 -128.8847  
 -128.6901  
 -128.6408  
 -128.4952  
 -128.0814  
 -127.4170  
 -127.4006  
 -126.7645  
 -126.7208  
 -126.5592  
 -126.3181  
 -125.5896  
 -125.4927  
 -124.9984  
 -39.6635  
 -34.9547  
 -34.0282  
 -29.8768

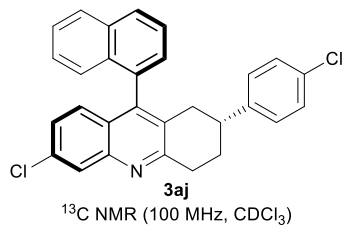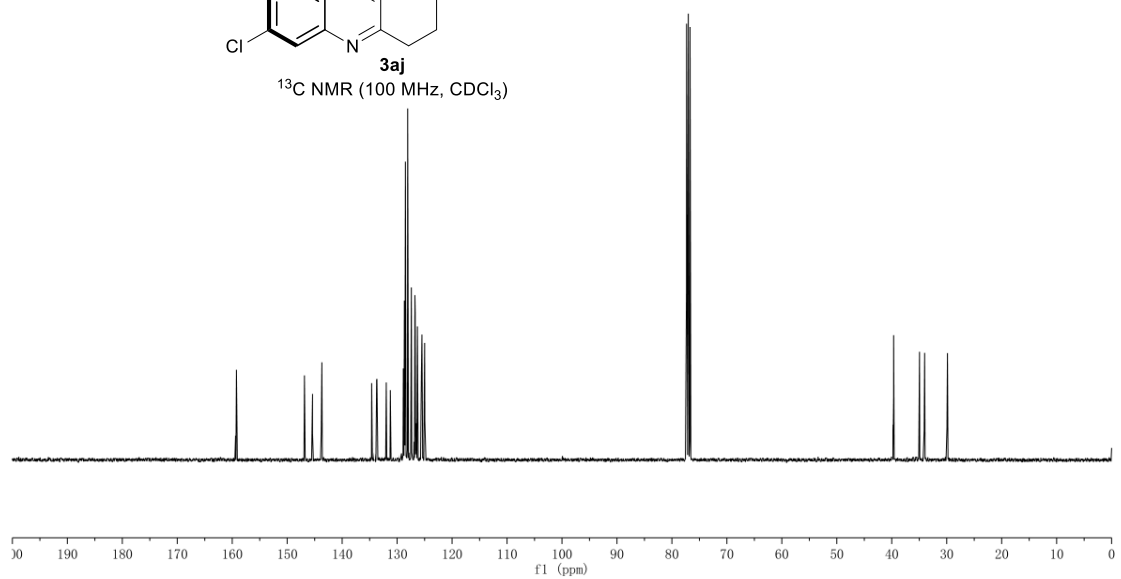

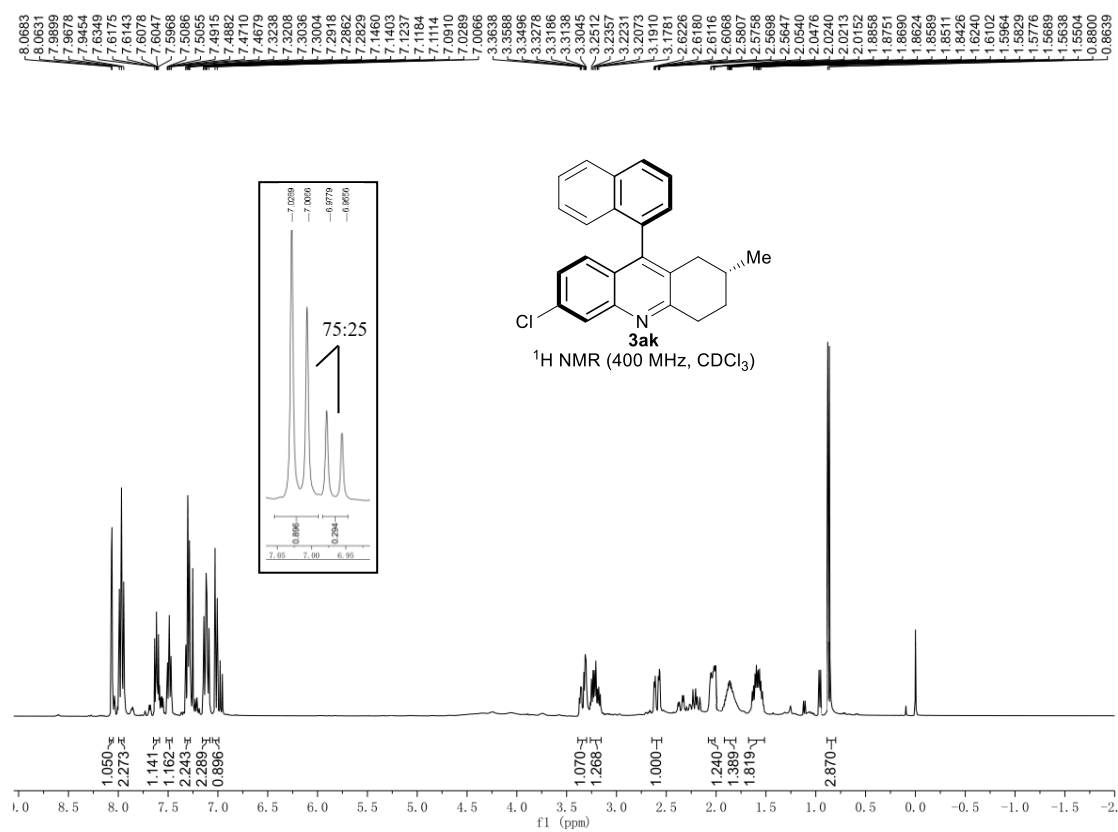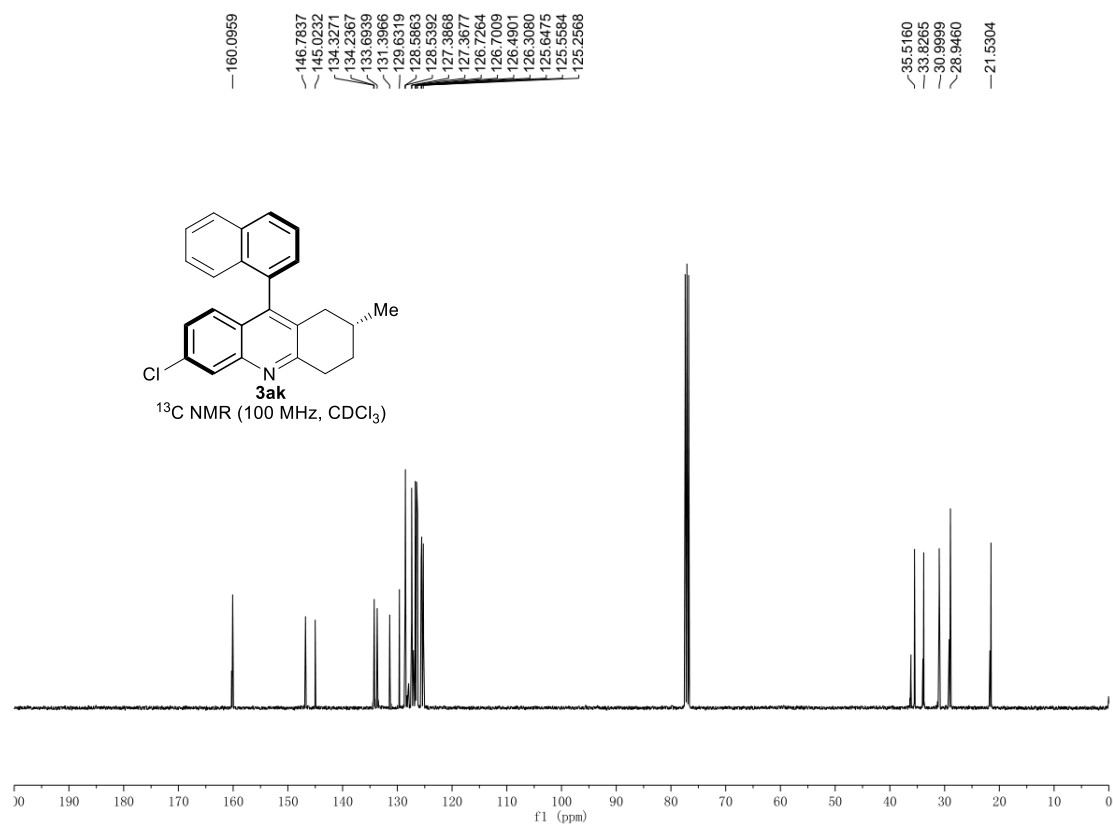

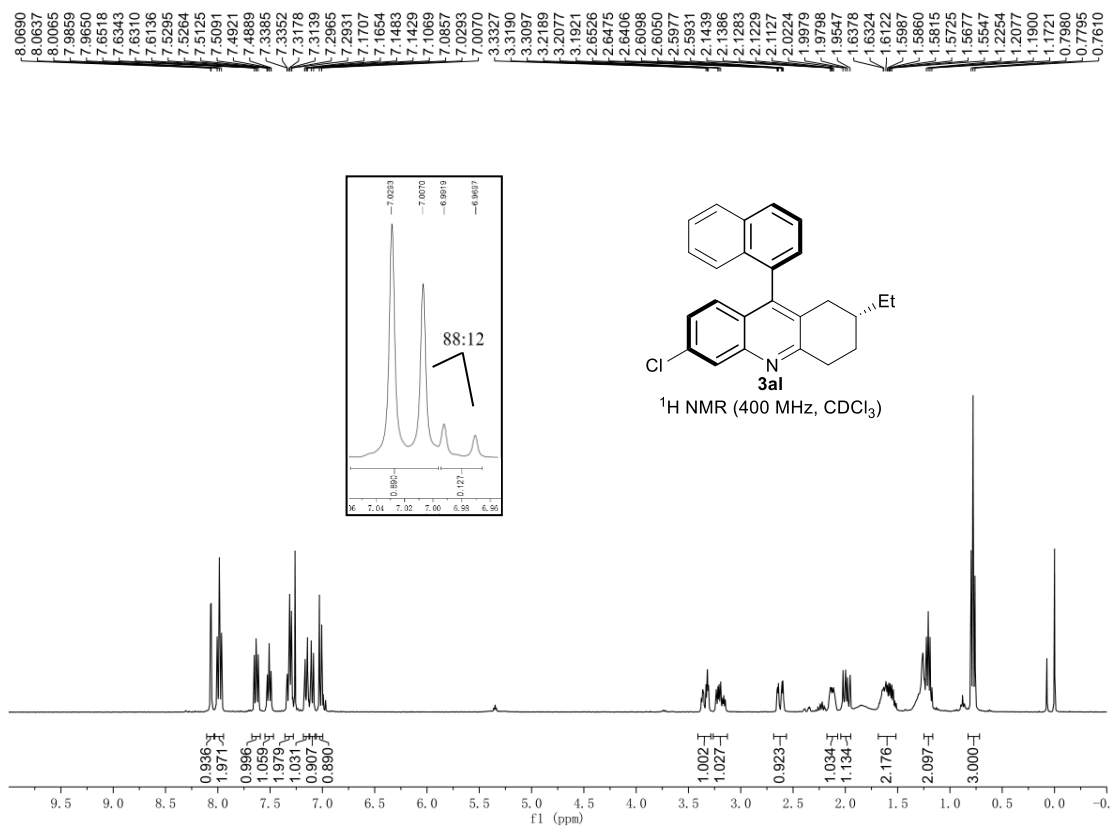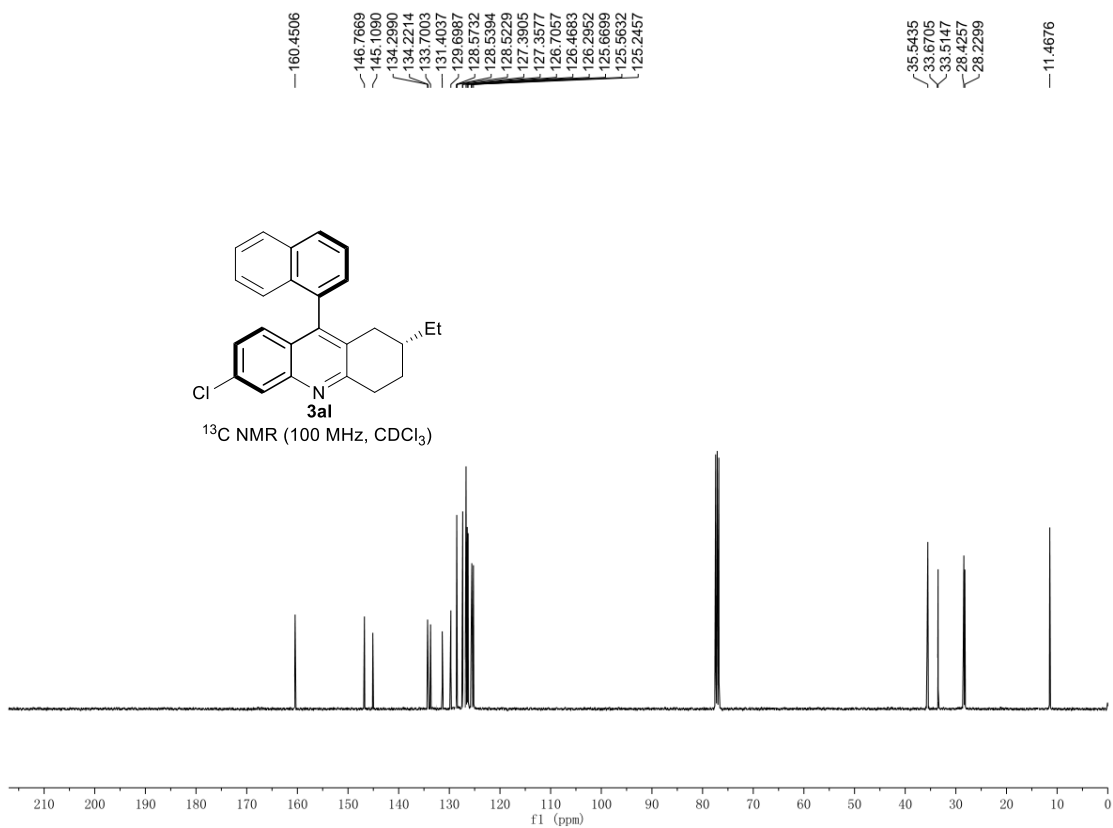

8.1153  
8.0842  
8.0609  
7.5395  
7.5211  
7.4521  
7.4346  
7.3166  
7.2973  
7.2786  
7.1820  
7.1640  
7.1421  
7.1235  
7.1061  
7.0546  
7.0317

3.2407  
3.2244  
3.2075  
2.7965  
2.5686  
2.5476  
2.5249  
2.5069  
2.3515  
2.3354  
2.3172  
2.2921  
1.9614  
1.9452  
1.9279  
1.7227  
1.7057  
1.6892

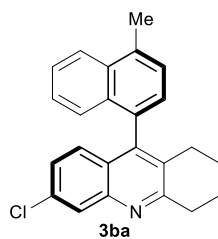

<sup>1</sup>H NMR (400 MHz, CDCl<sub>3</sub>)

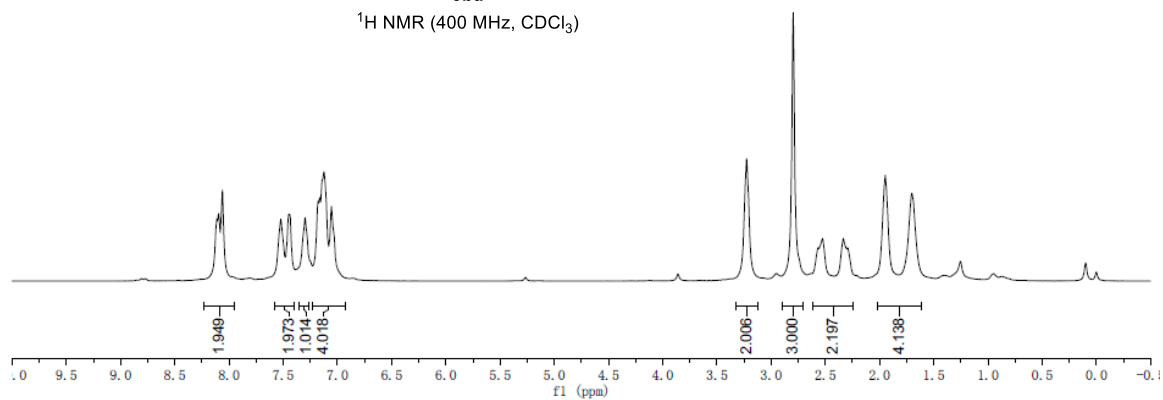

160.4360  
146.7389  
145.3690  
134.9530  
134.2428  
132.8170  
132.4208  
131.3524  
130.1569  
127.4440  
127.3478  
126.5712  
126.4186  
126.3625  
126.3377  
126.1253  
125.8533  
125.8056  
124.7112

34.3457  
27.5190  
22.8659  
22.8153  
19.6448

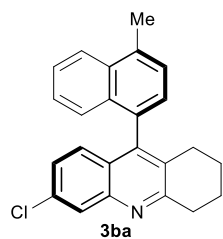

<sup>13</sup>C NMR (100 MHz, CDCl<sub>3</sub>)

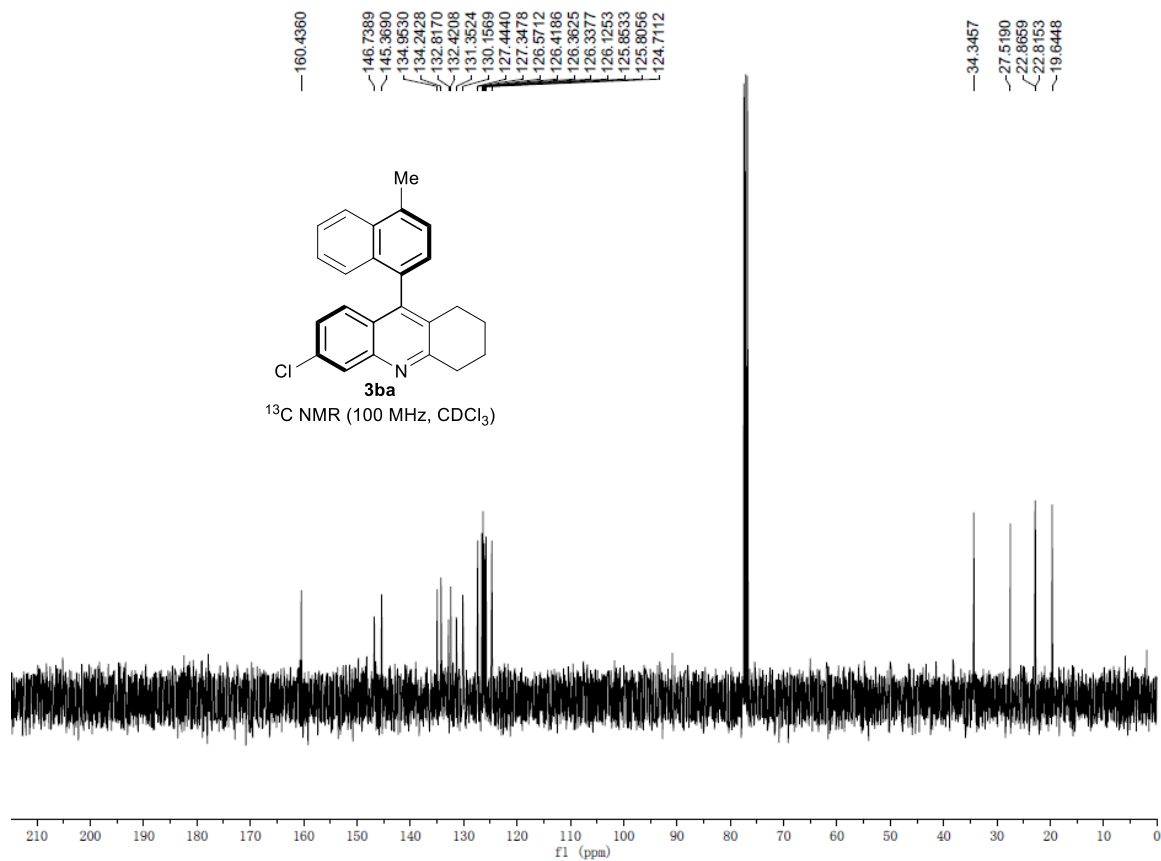

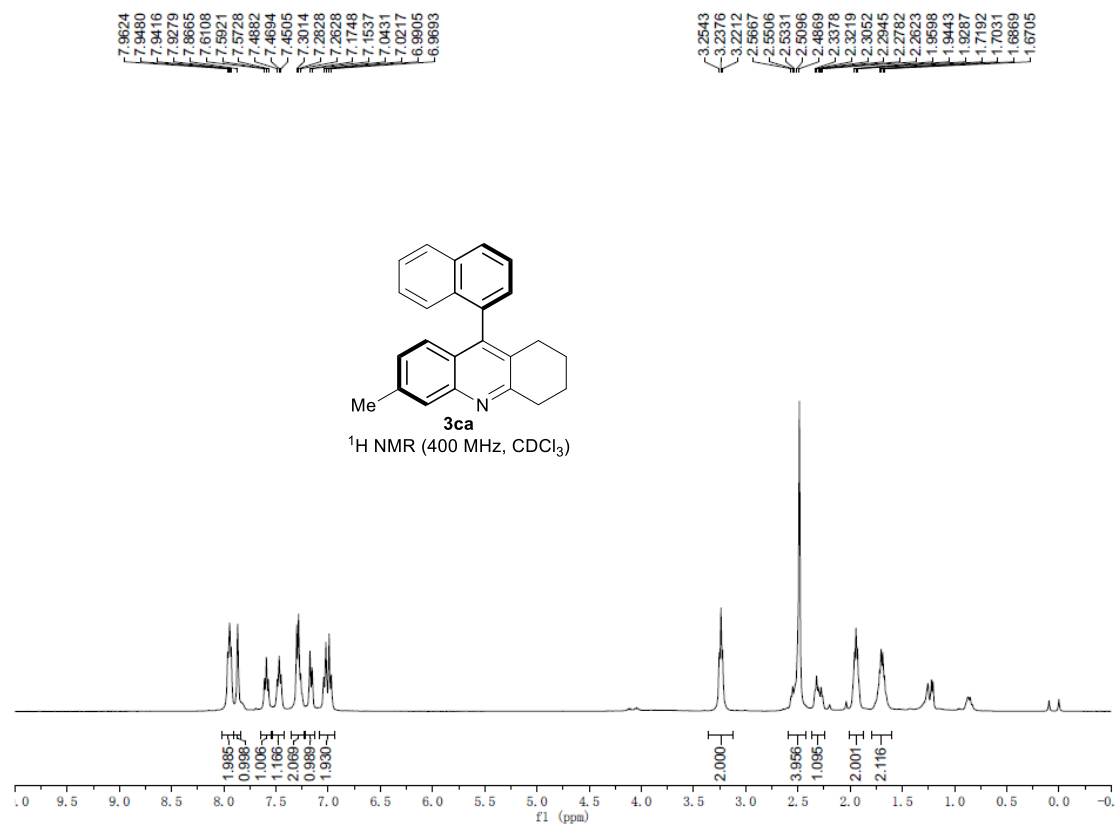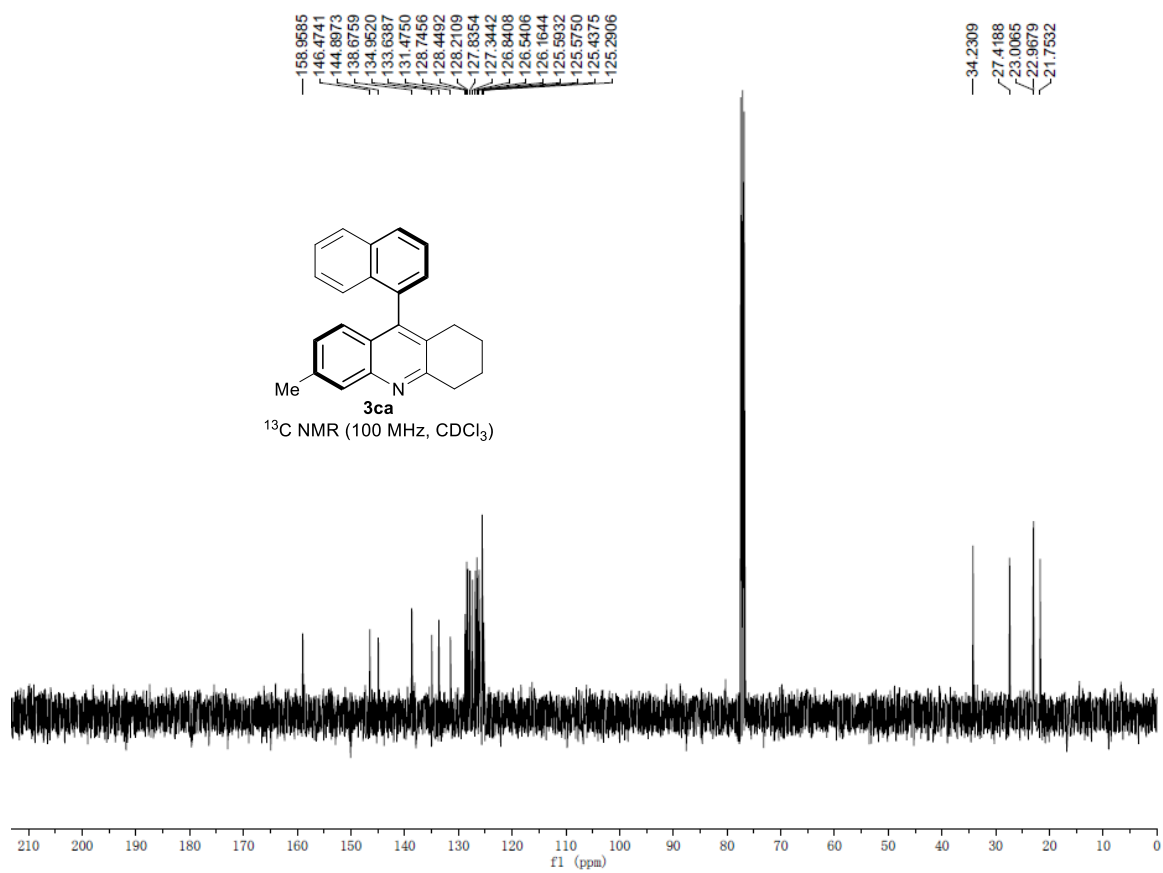



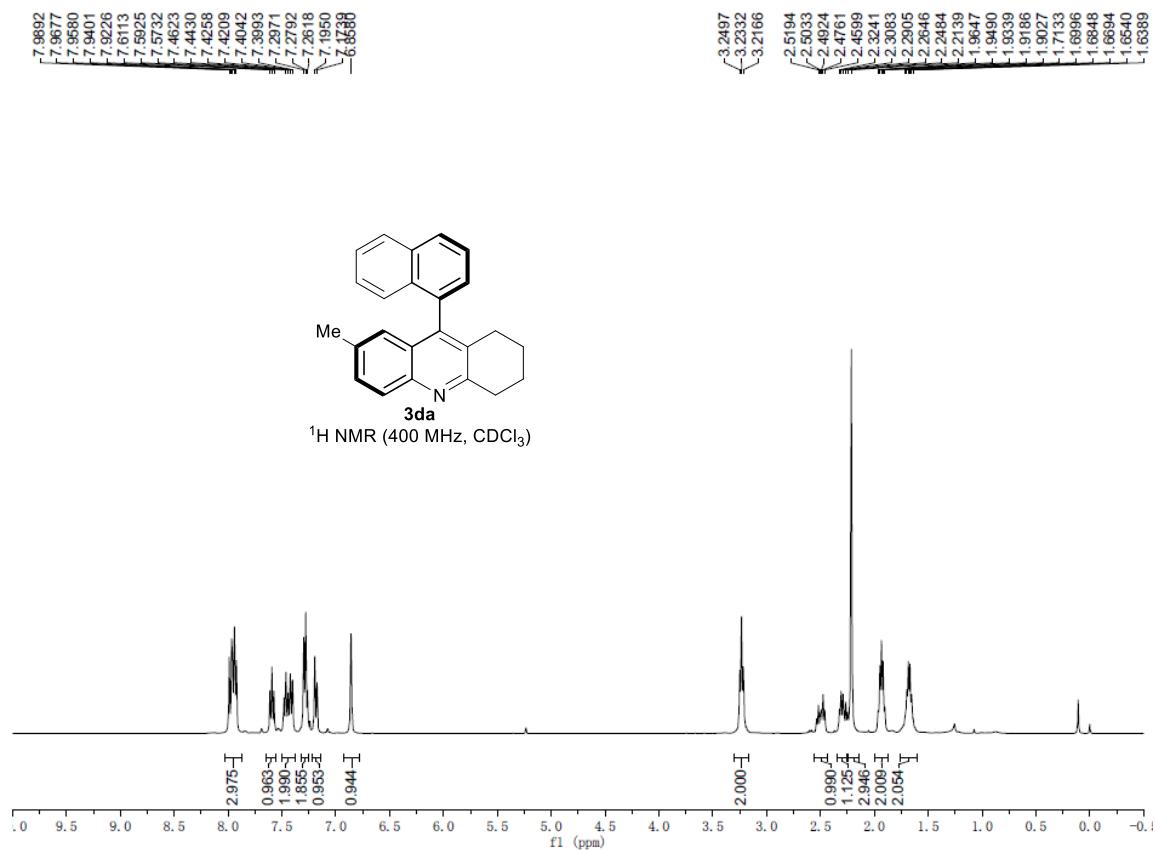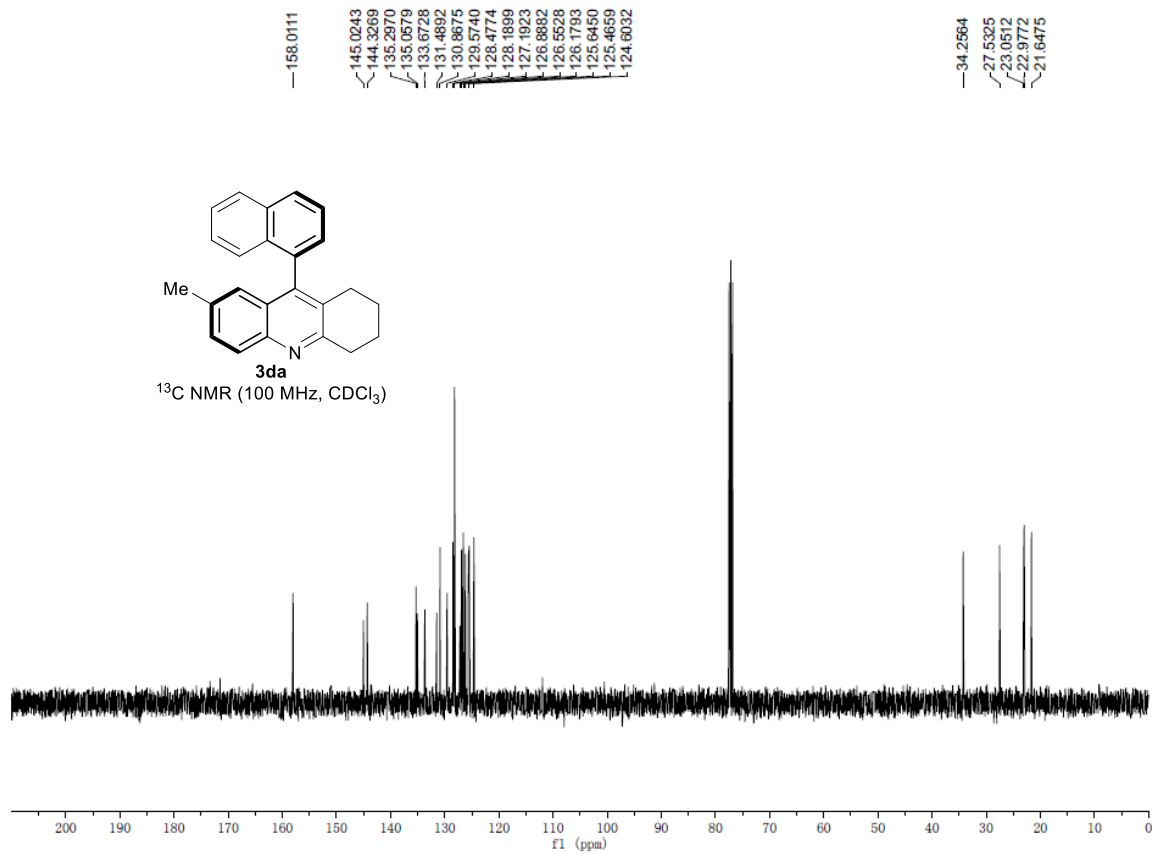

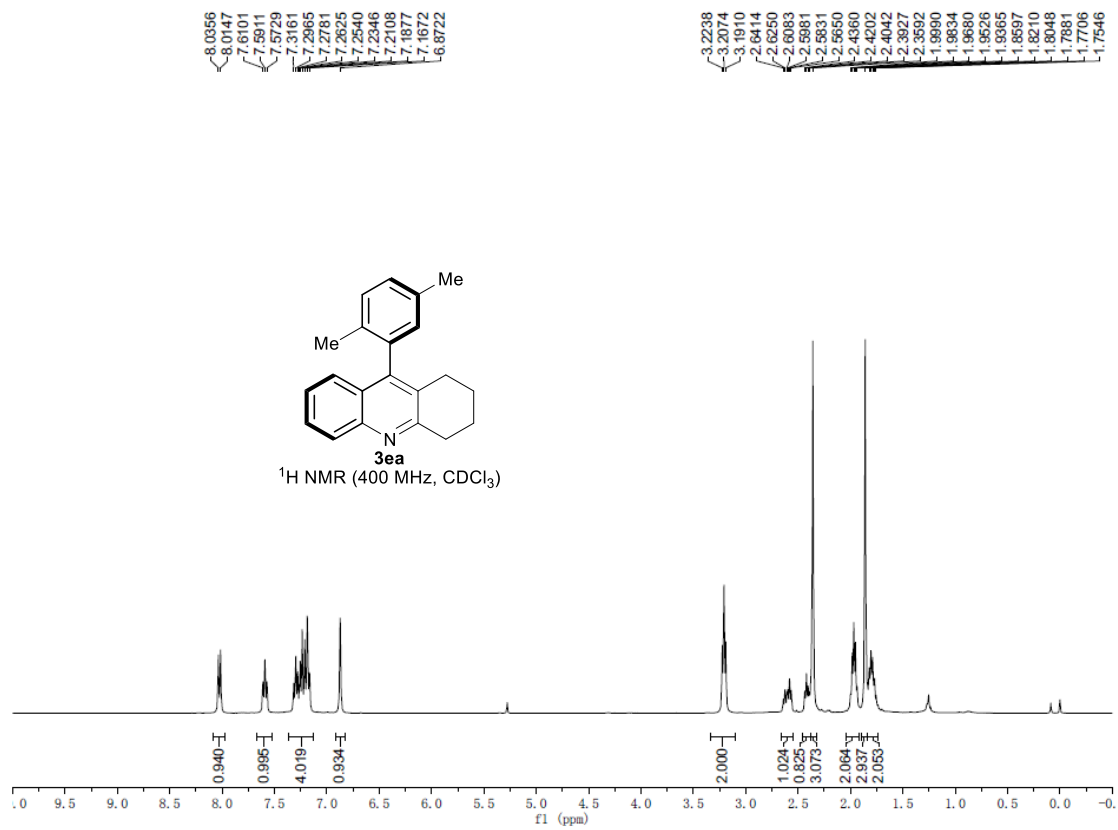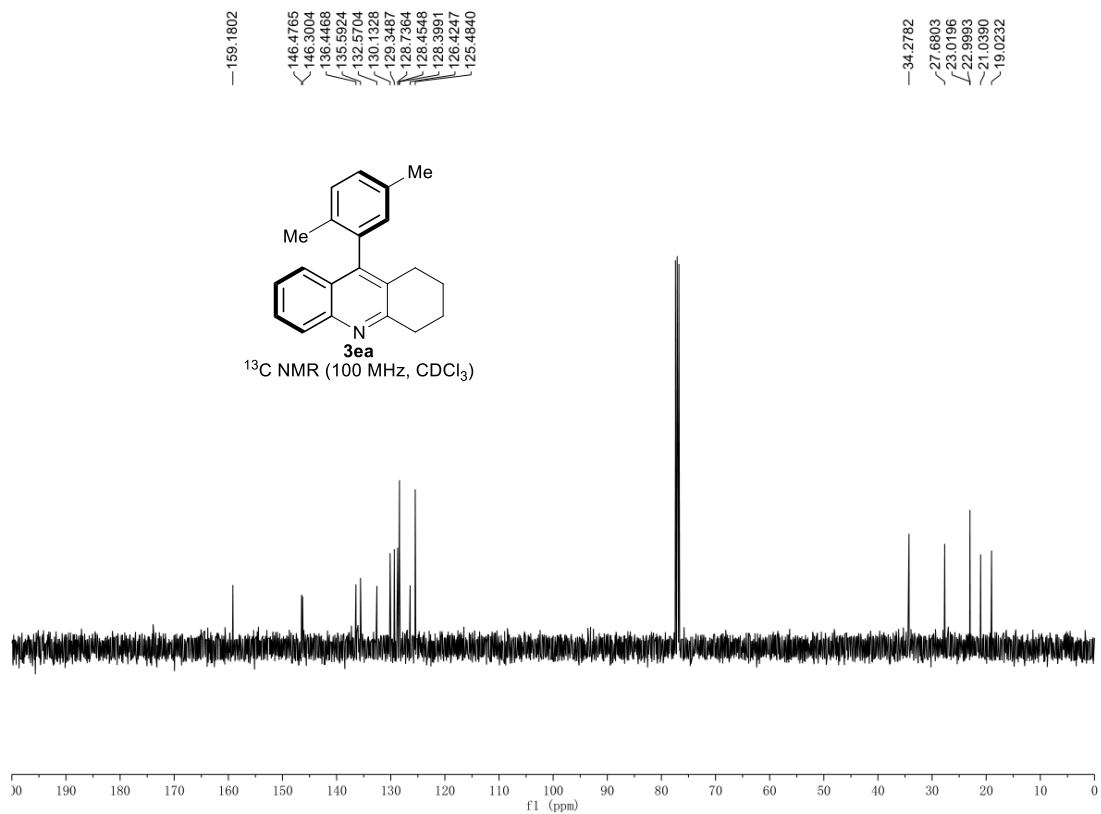

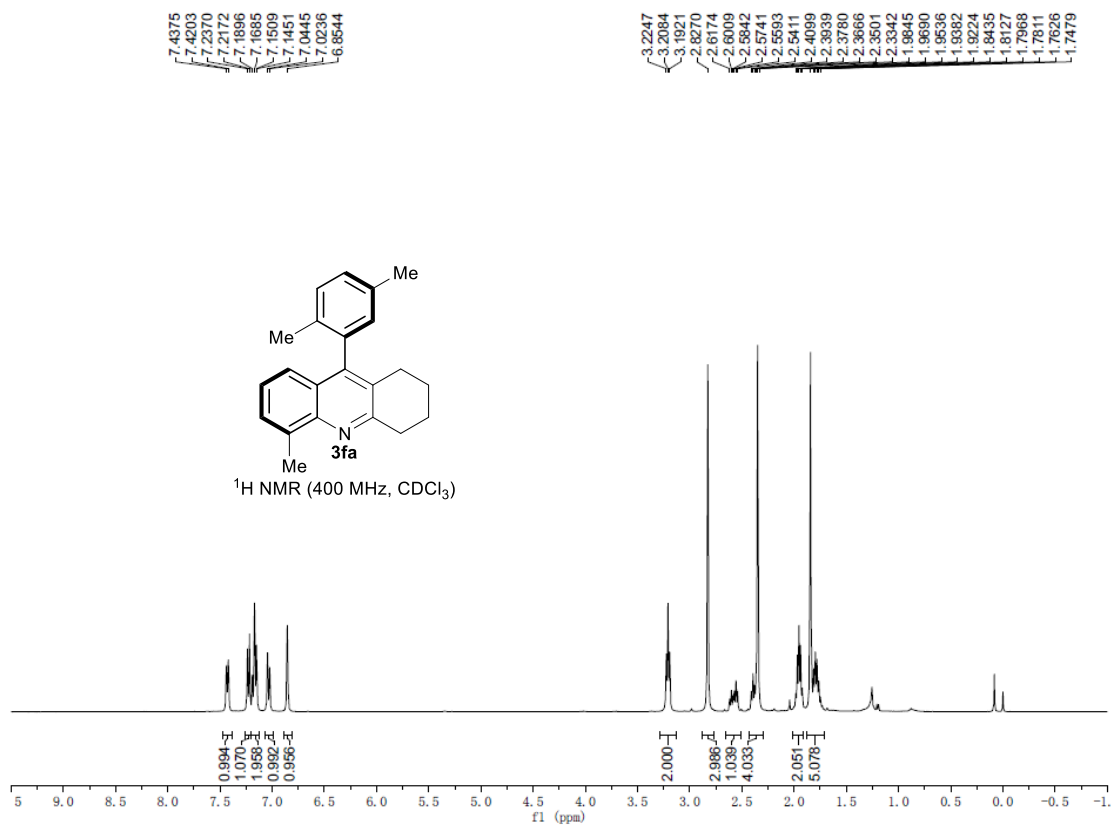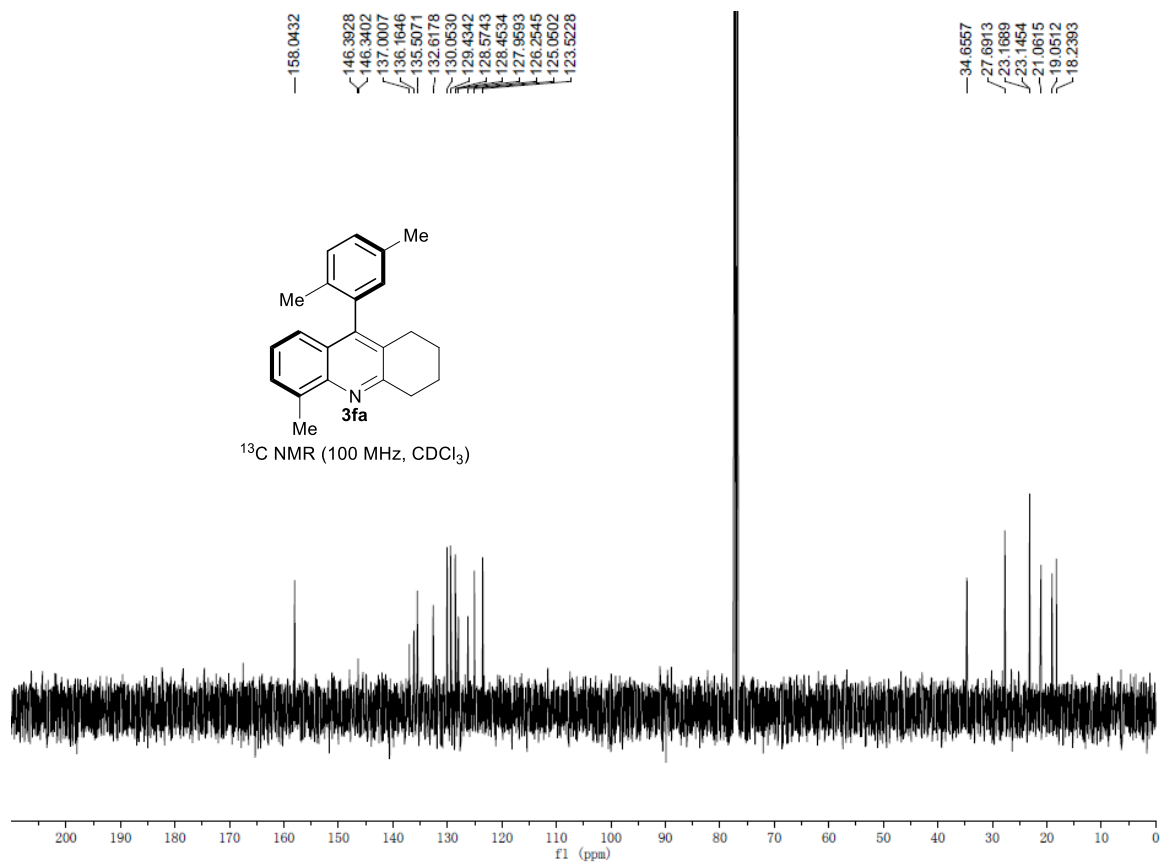

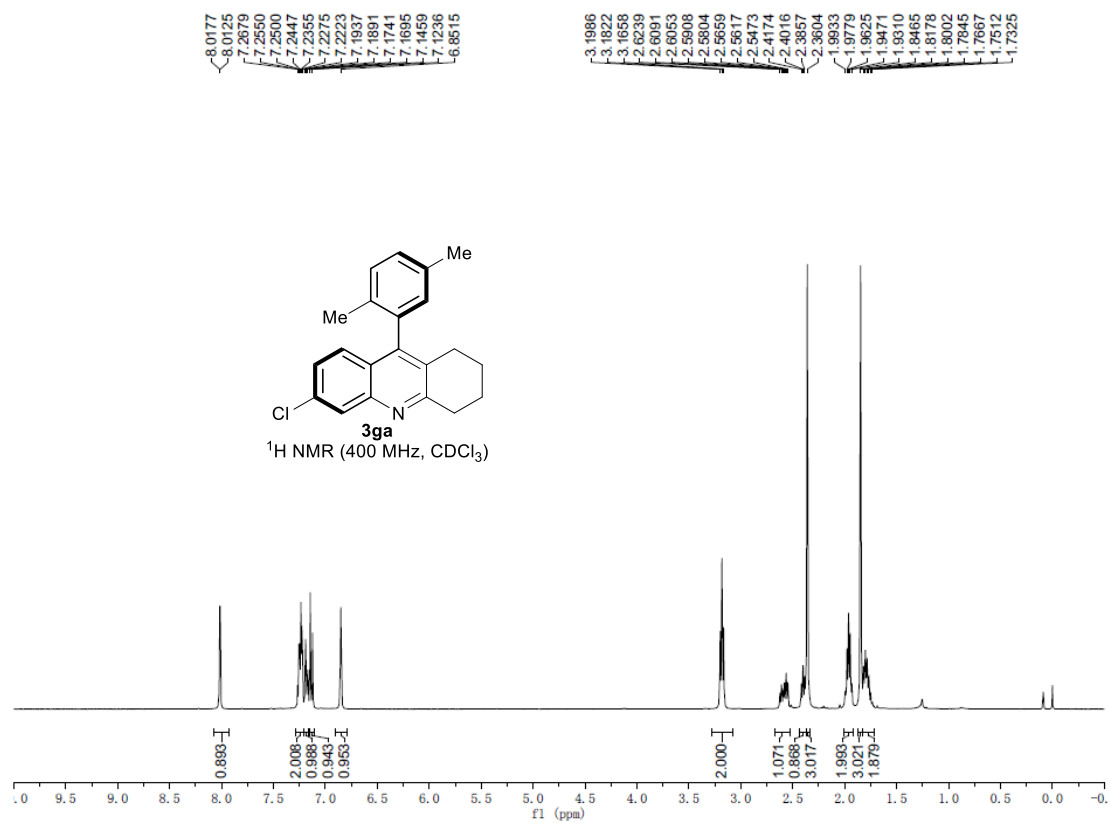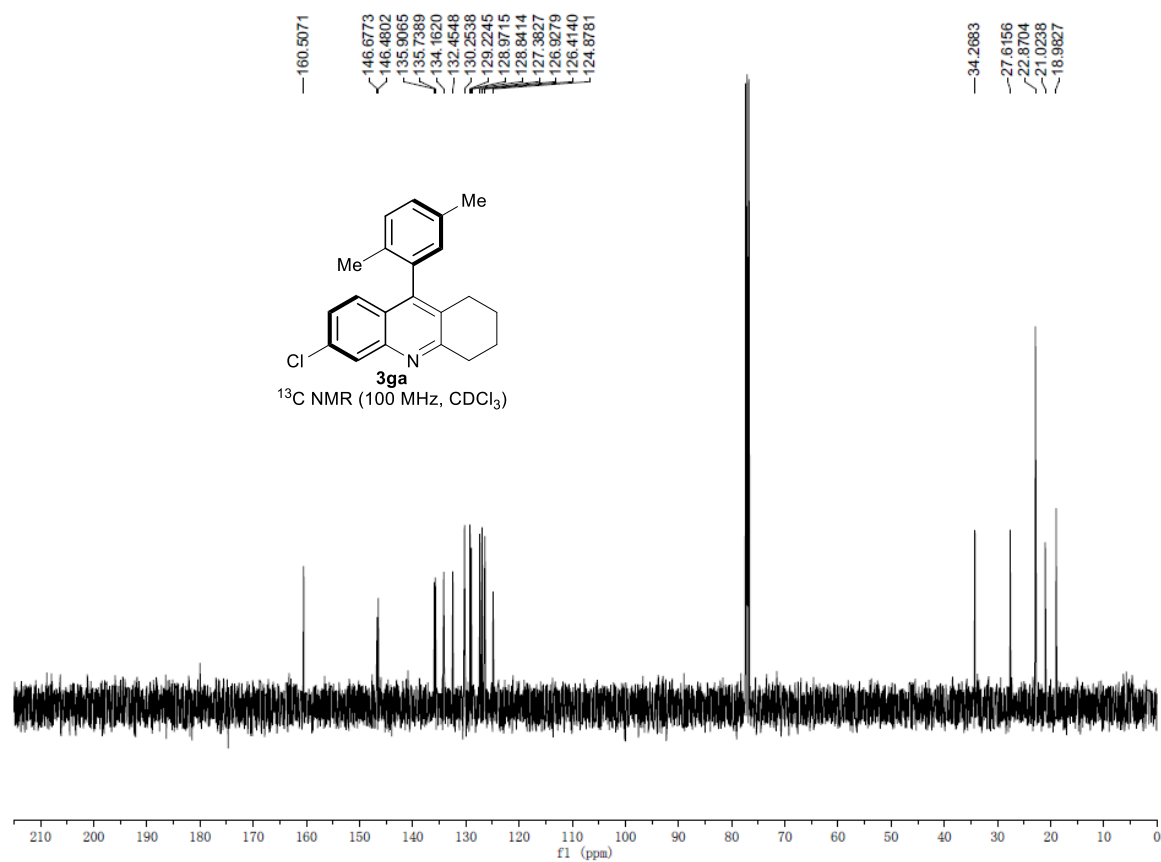

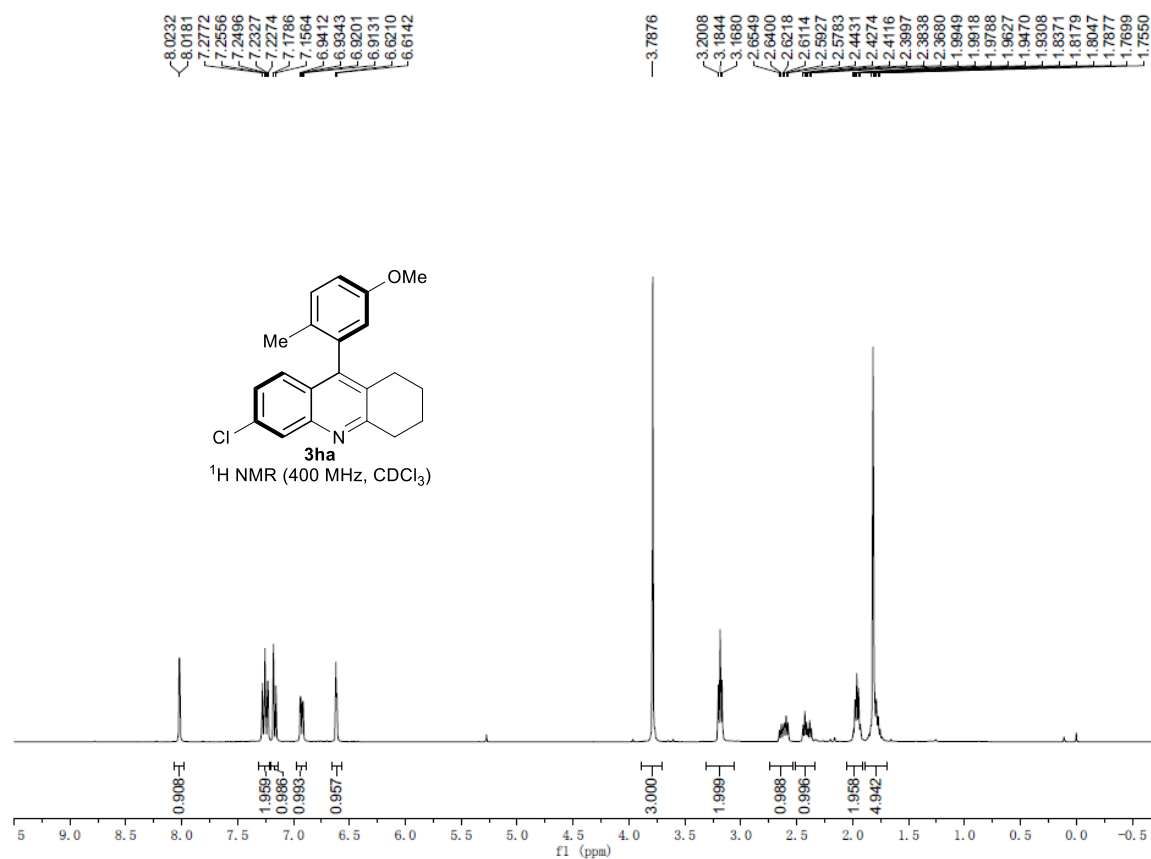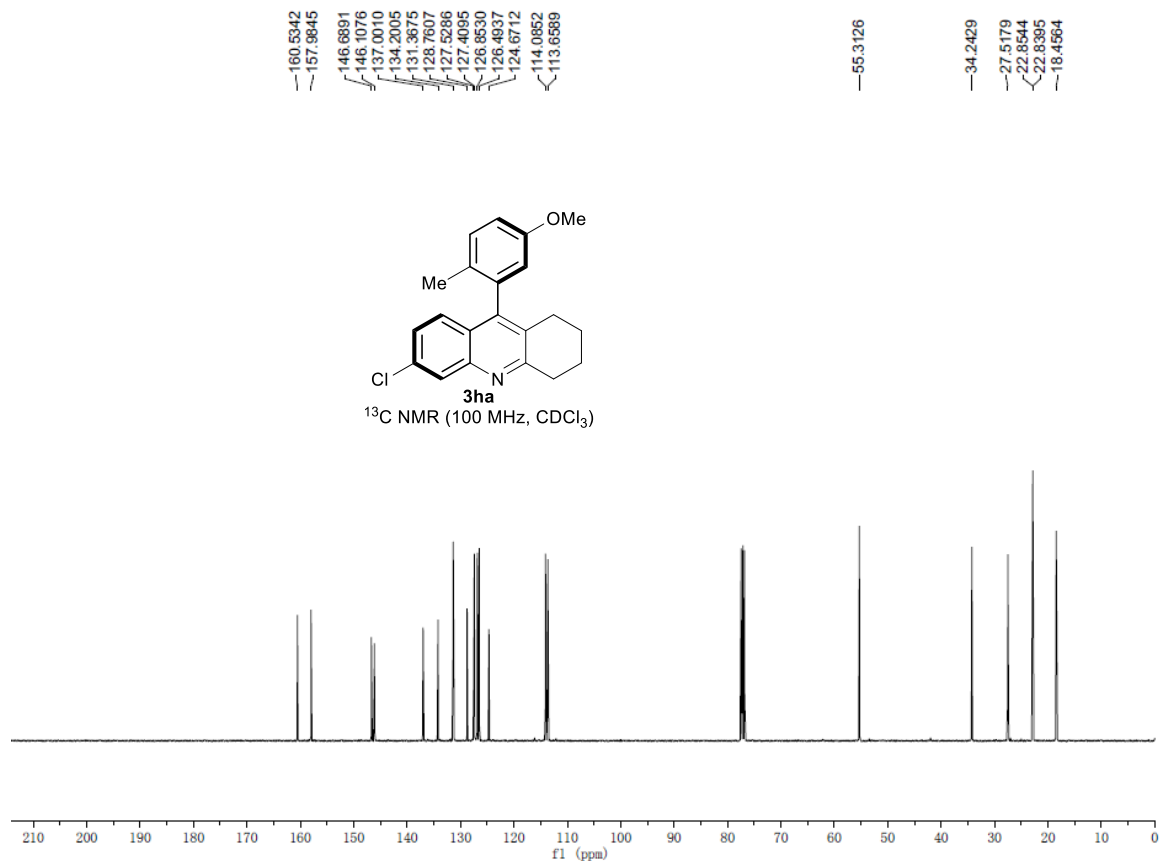

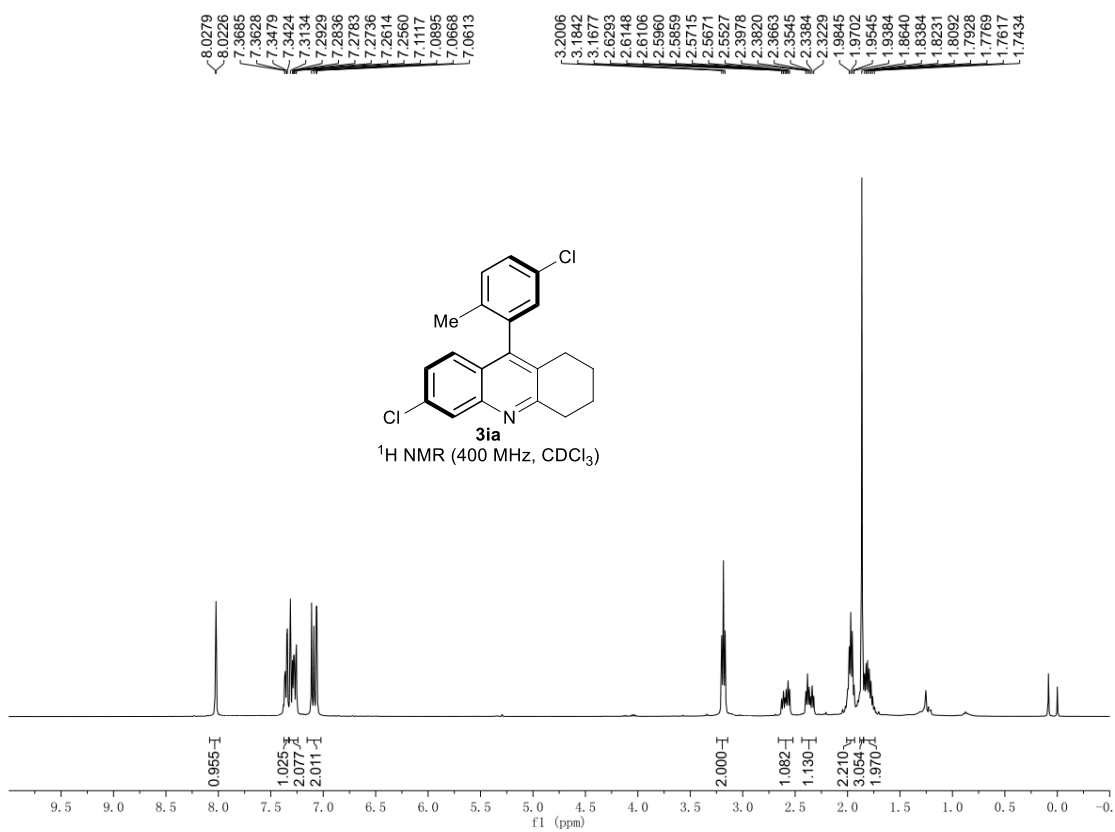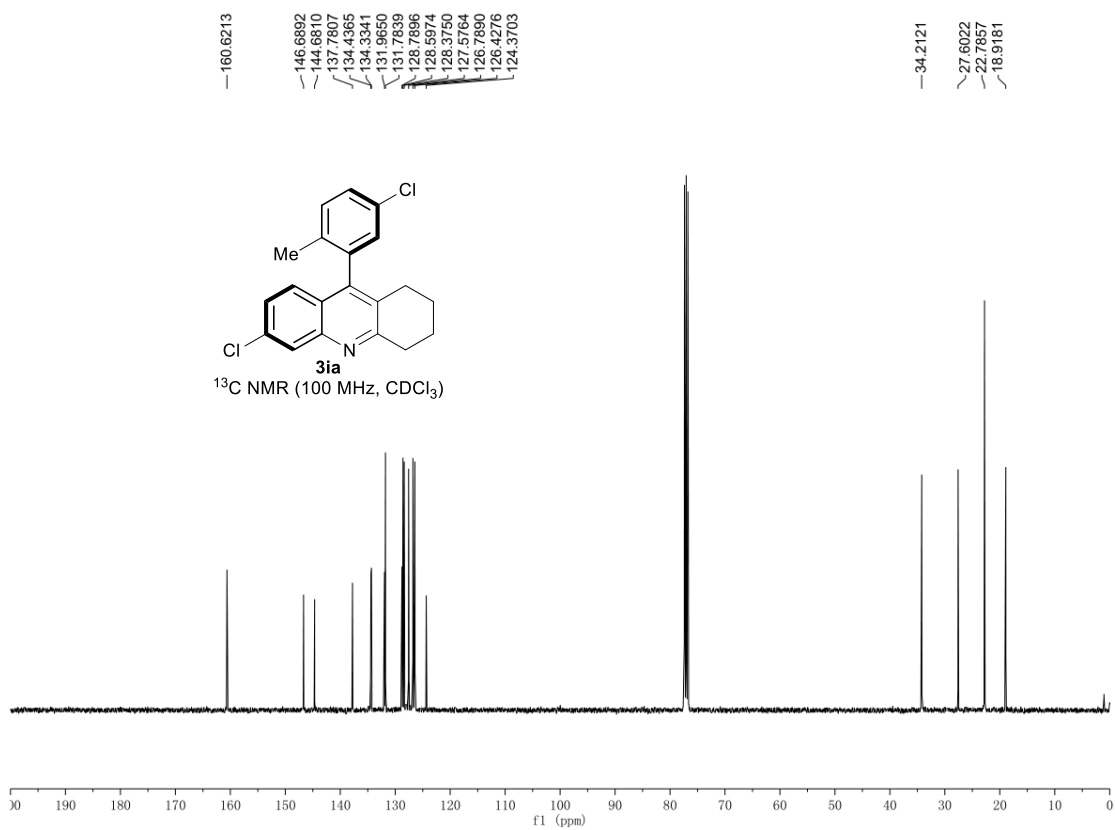

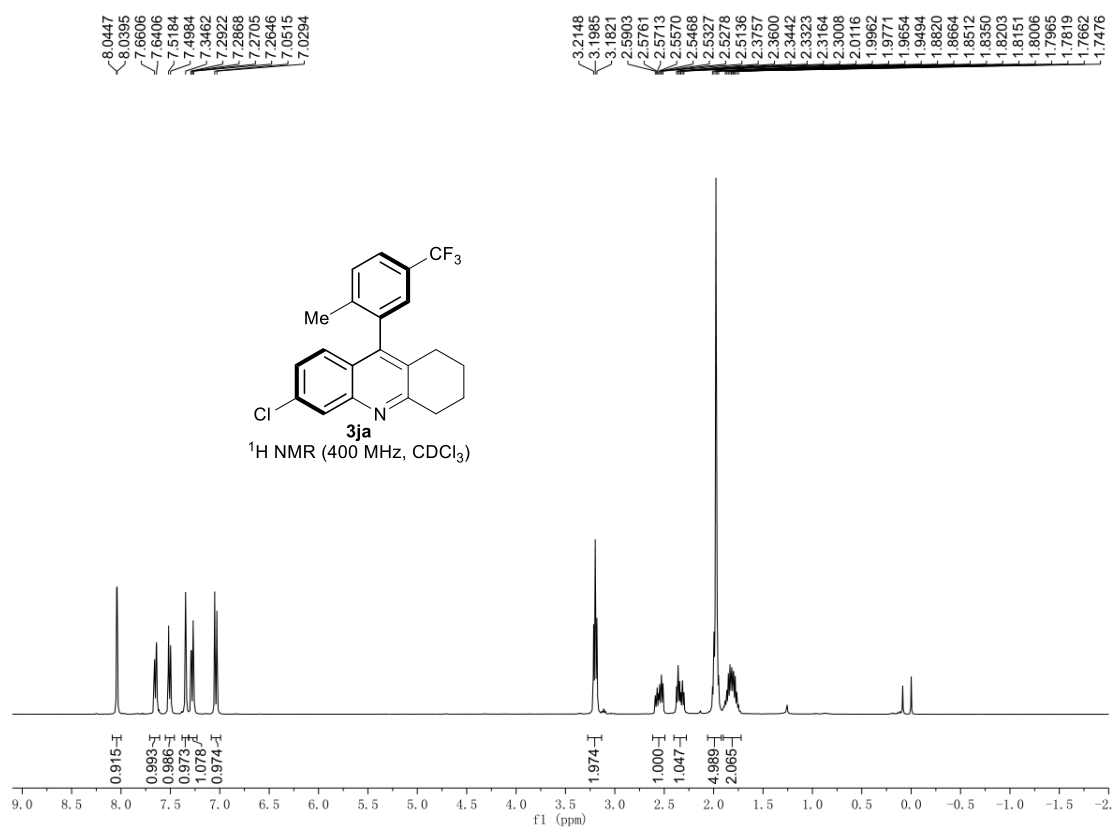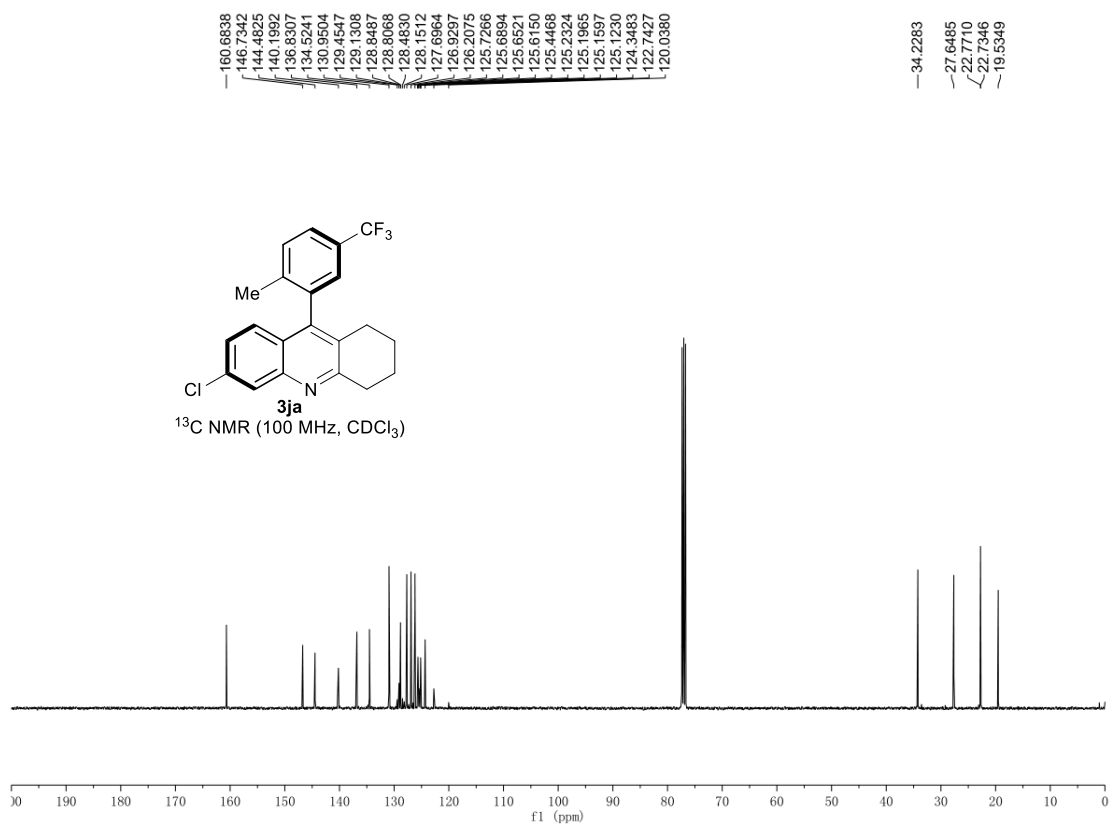

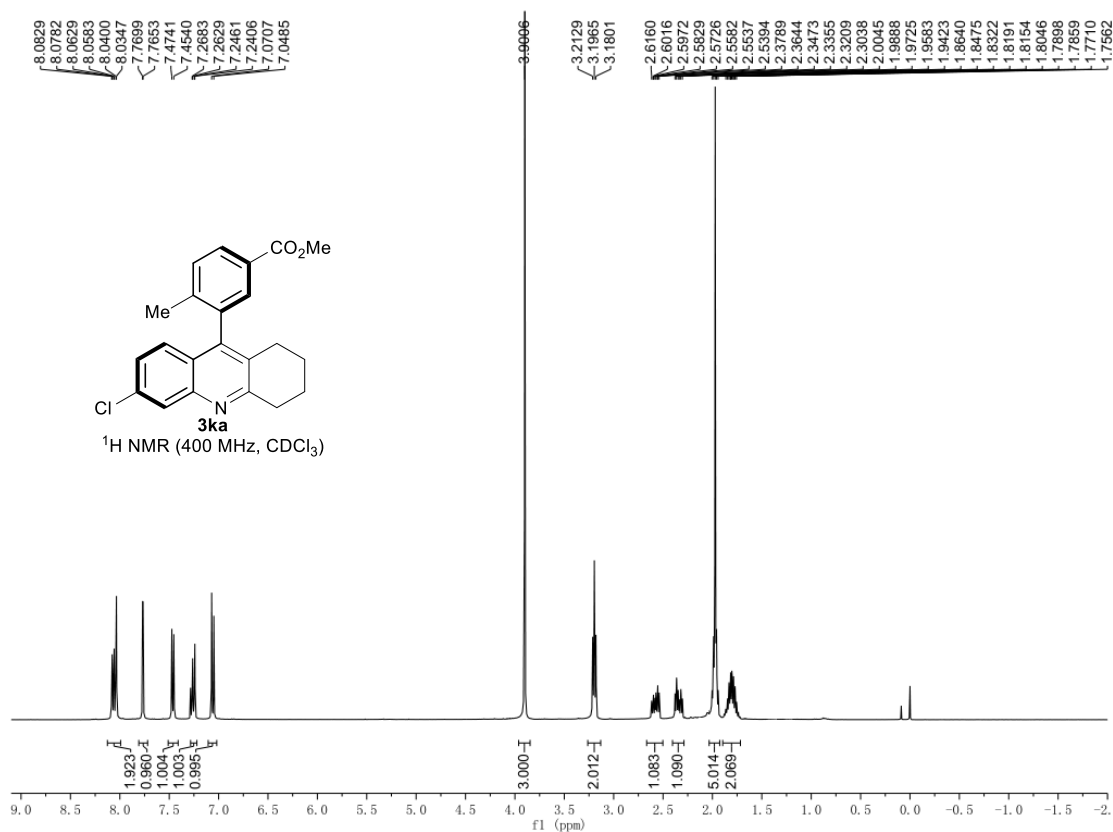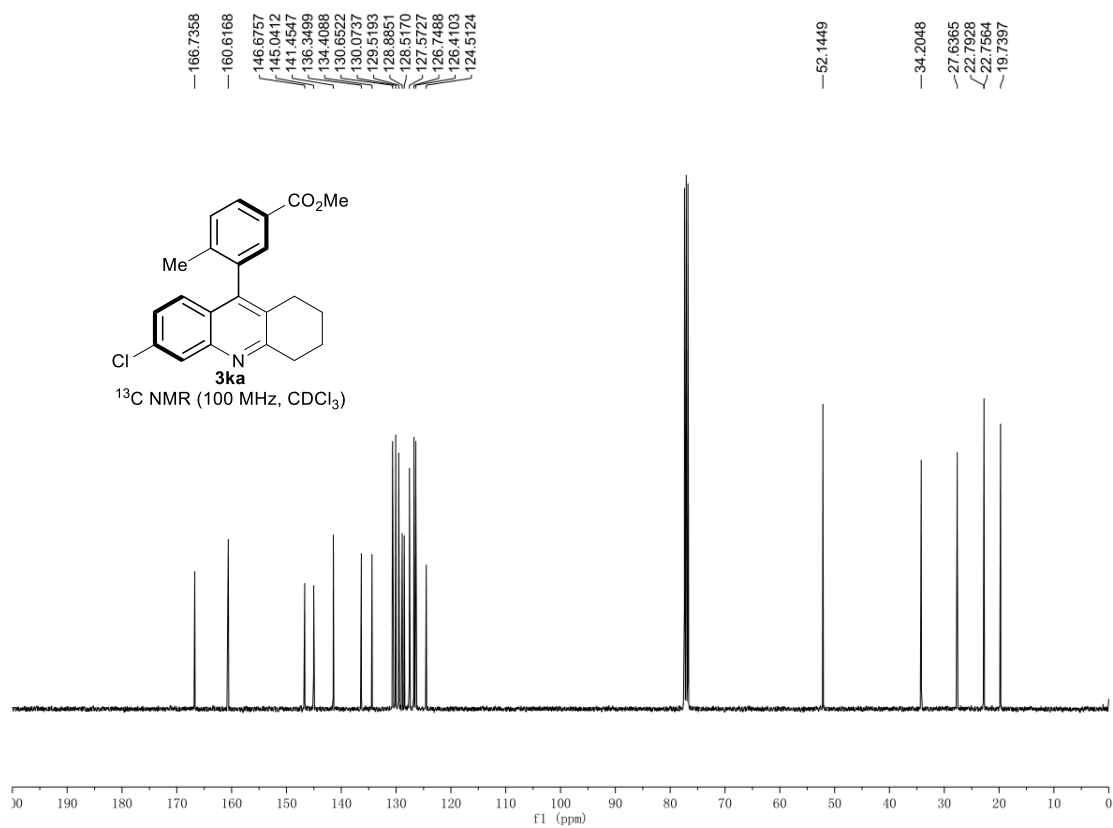



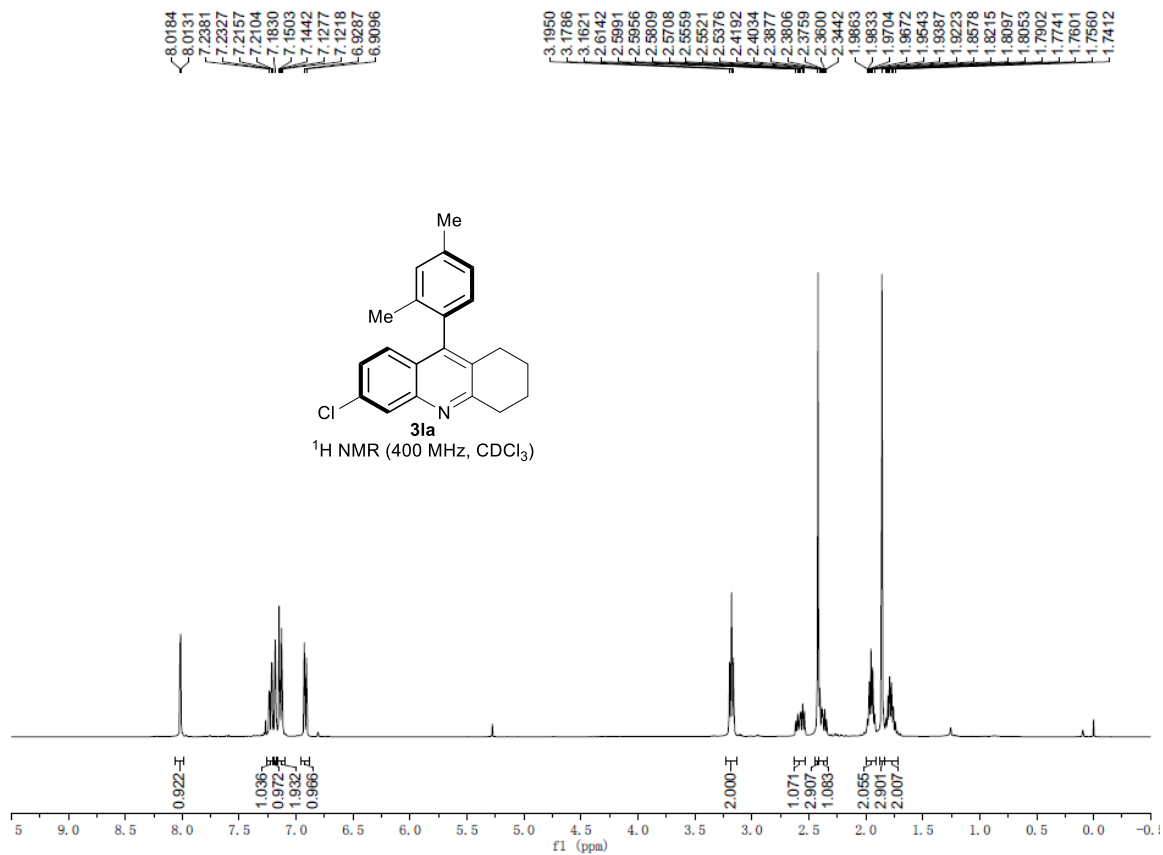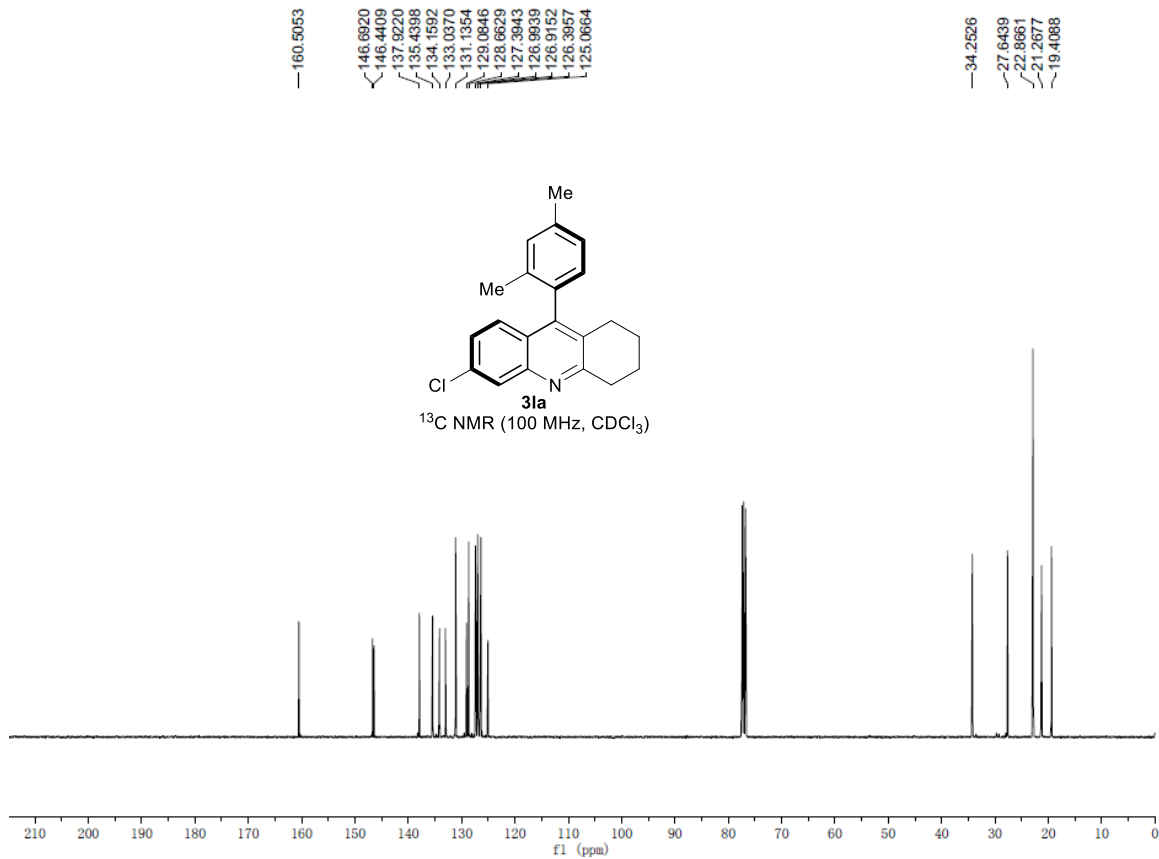

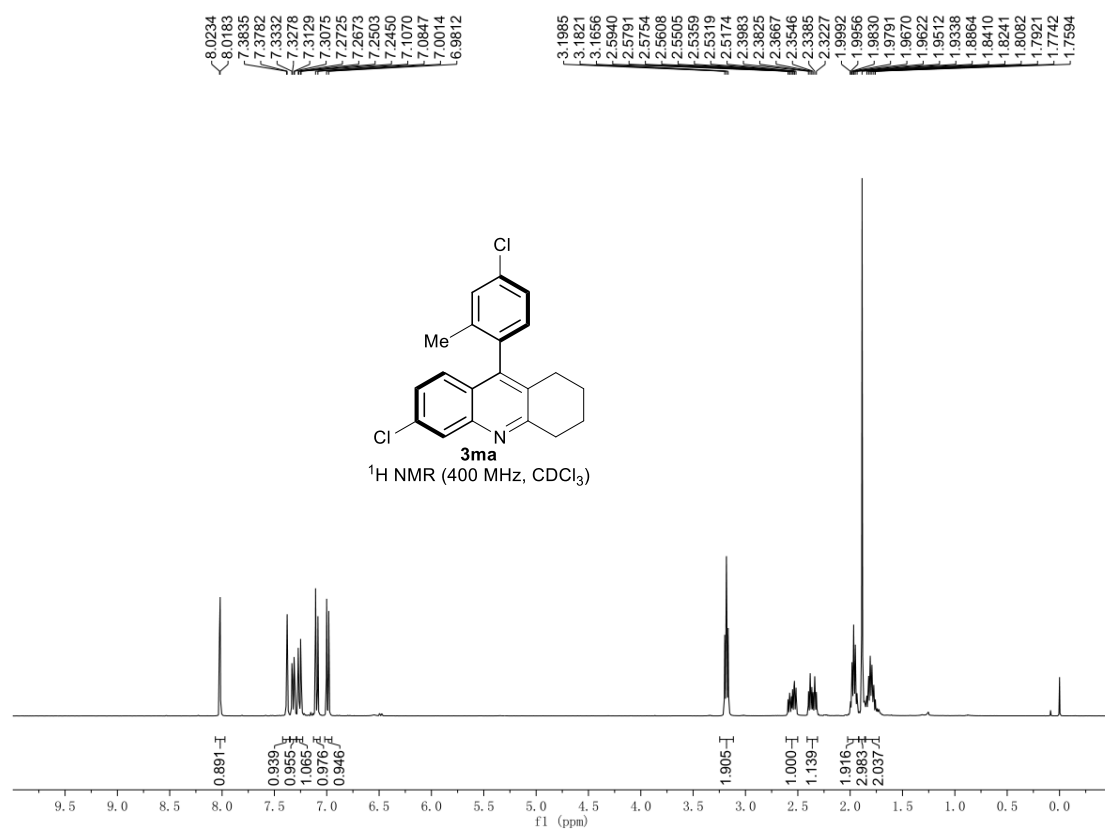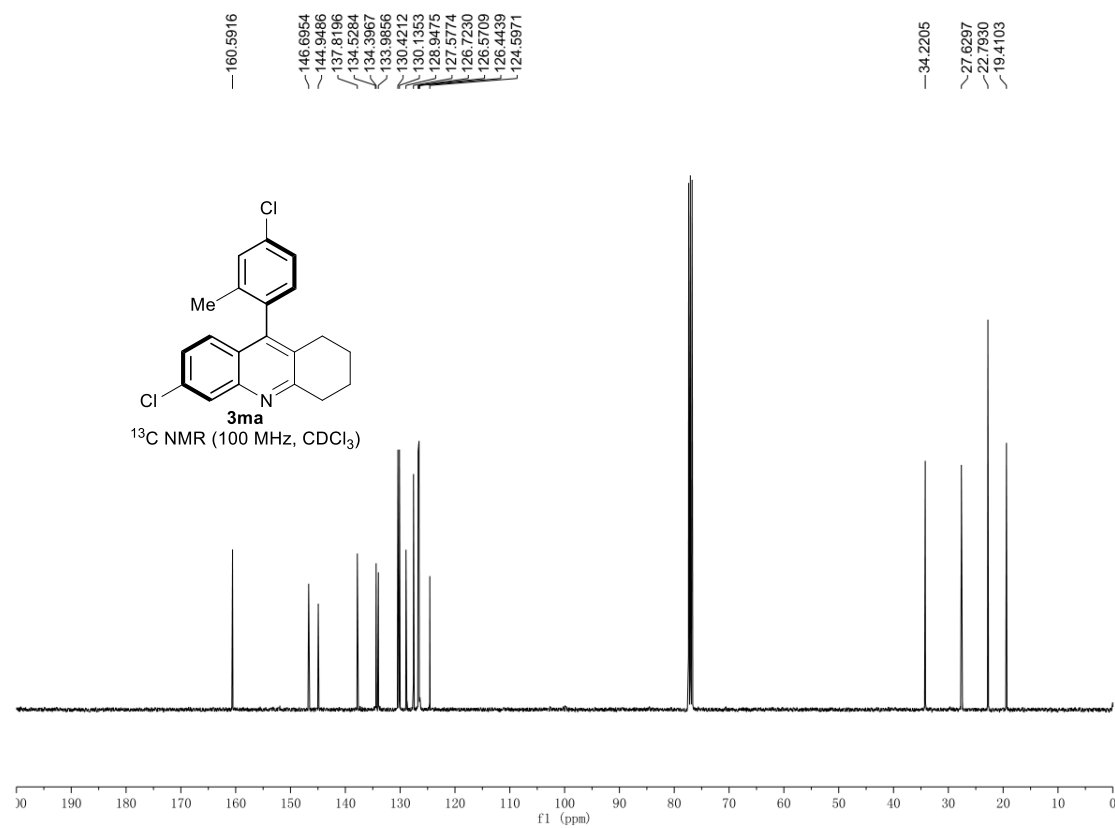

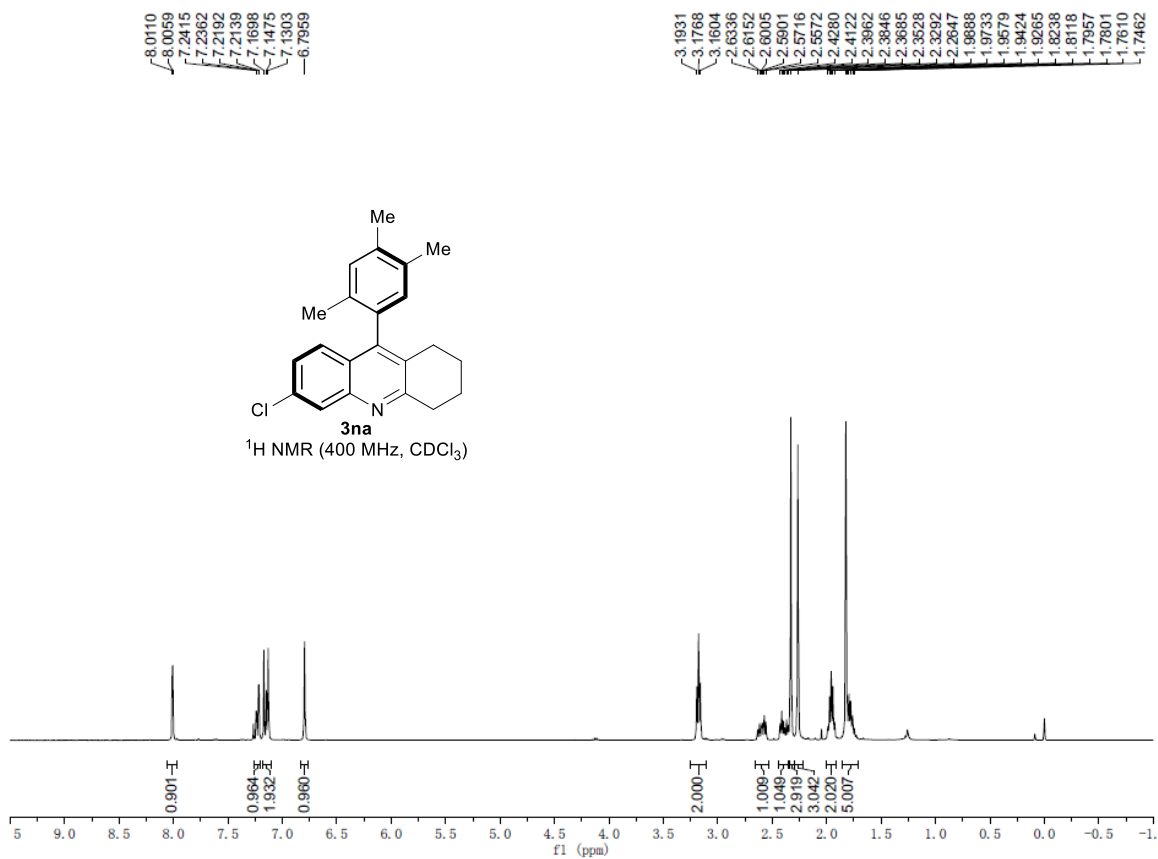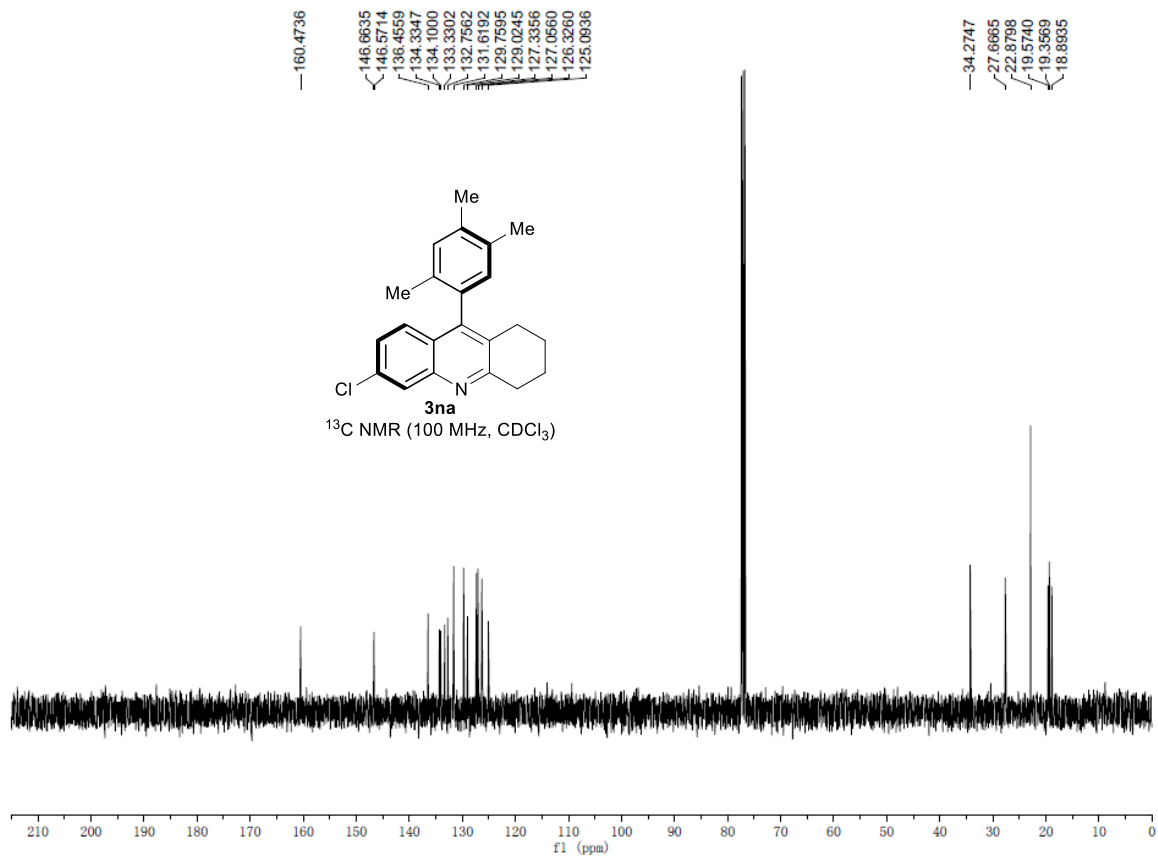

8.0358  
8.0306  
7.5764  
7.5706  
7.5683  
7.5623  
7.5578  
7.5532  
7.4526  
7.4468  
7.4340  
7.4283  
7.4195  
7.4105  
7.4058  
7.3923  
7.3872  
7.2762  
7.2713  
7.2540  
7.2486  
7.1744  
7.1691  
7.1645  
7.1599  
7.1577  
7.1512  
7.1220  
7.0998  
3.2072  
3.2001  
3.1910  
3.1836  
3.1743  
3.1672  
2.5004  
2.5414  
2.5340  
2.5251  
2.5174  
2.5093  
1.9993  
1.9941  
1.9829  
1.9776  
1.9695  
1.9611  
1.9529  
1.9442  
1.9361  
1.8380  
1.8343  
1.8272  
1.8221  
1.8172  
1.8103  
1.8008  
1.7941  
1.7839

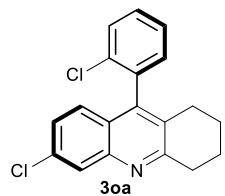

$^1\text{H NMR}$  (400 MHz,  $\text{CDCl}_3$ )

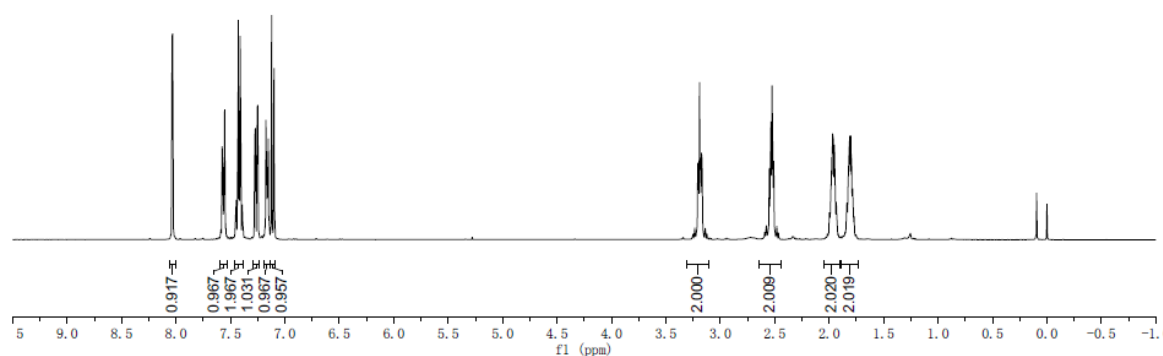

160.4837  
146.6586  
143.6828  
135.4492  
134.2901  
133.2750  
130.6187  
129.9703  
129.7351  
129.2969  
127.5333  
127.2446  
126.6656  
126.4799  
124.4854  
34.2299  
27.3912  
22.7646  
22.7146

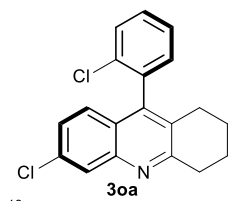

$^{13}\text{C NMR}$  (100 MHz,  $\text{CDCl}_3$ )

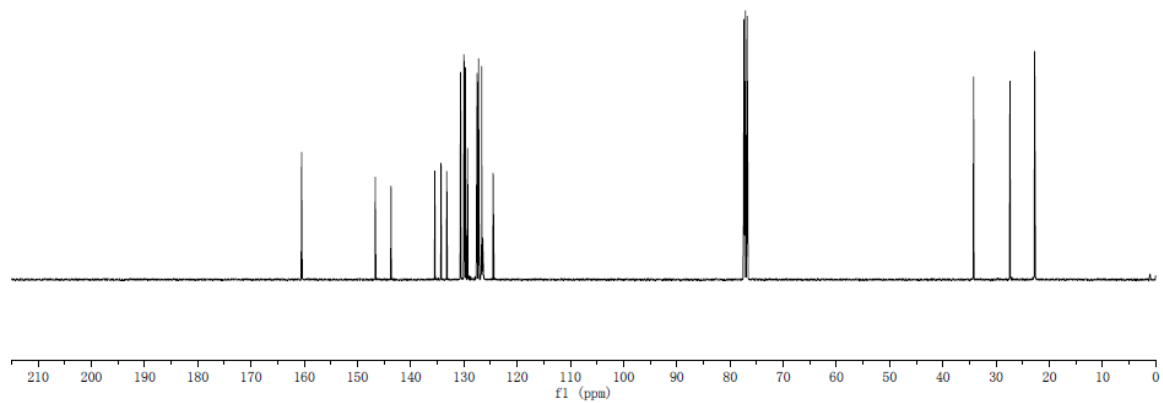

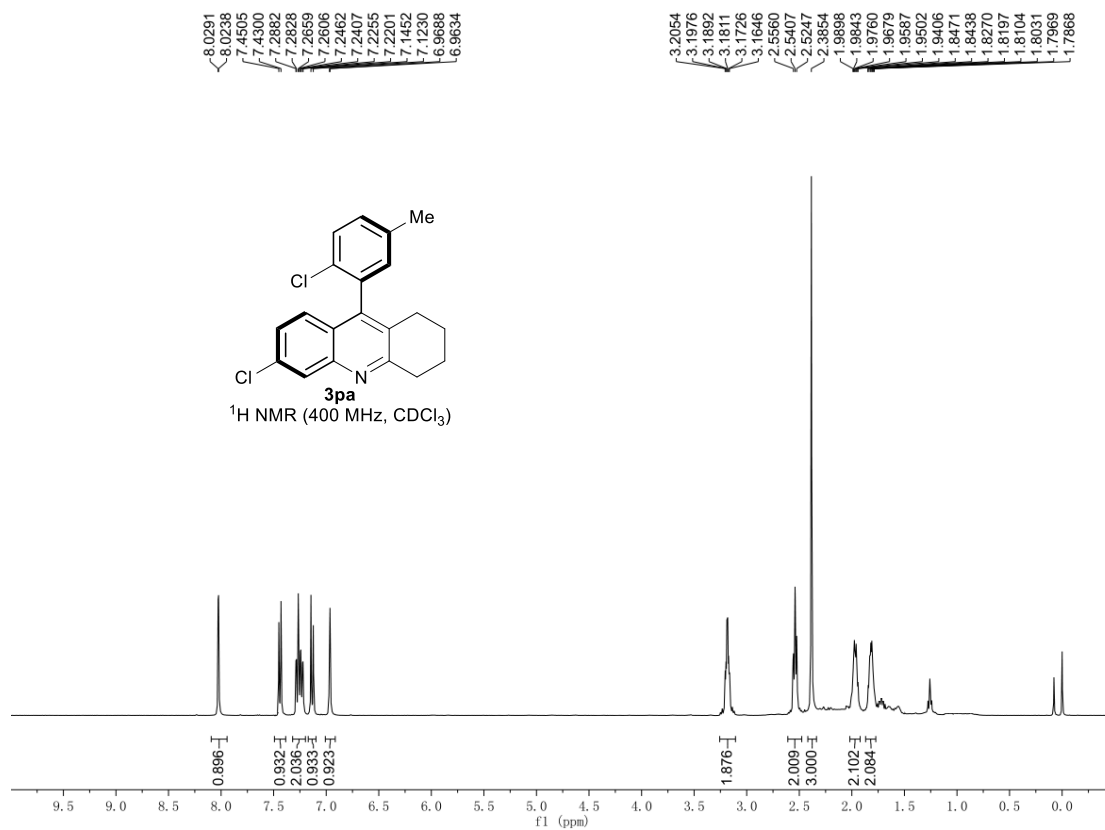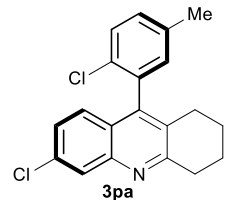

<sup>1</sup>H NMR (400 MHz, CDCl<sub>3</sub>)

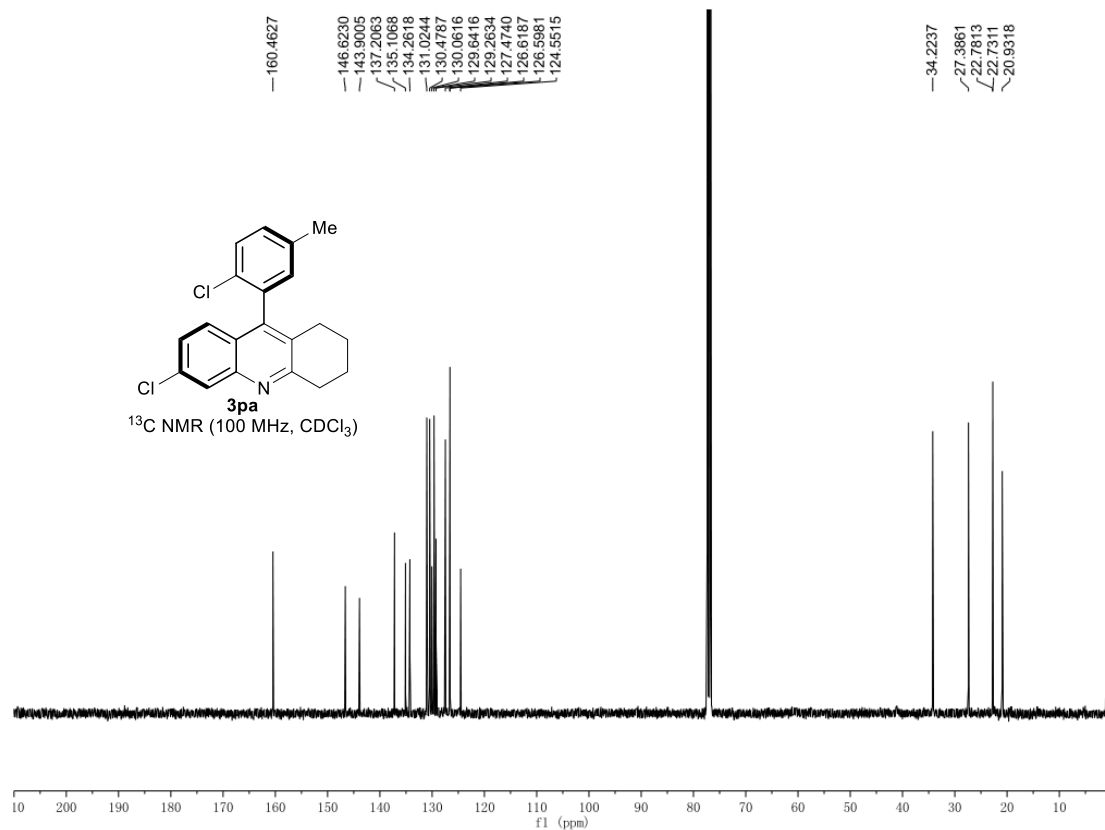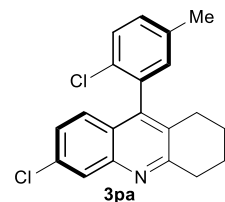

<sup>13</sup>C NMR (100 MHz, CDCl<sub>3</sub>)

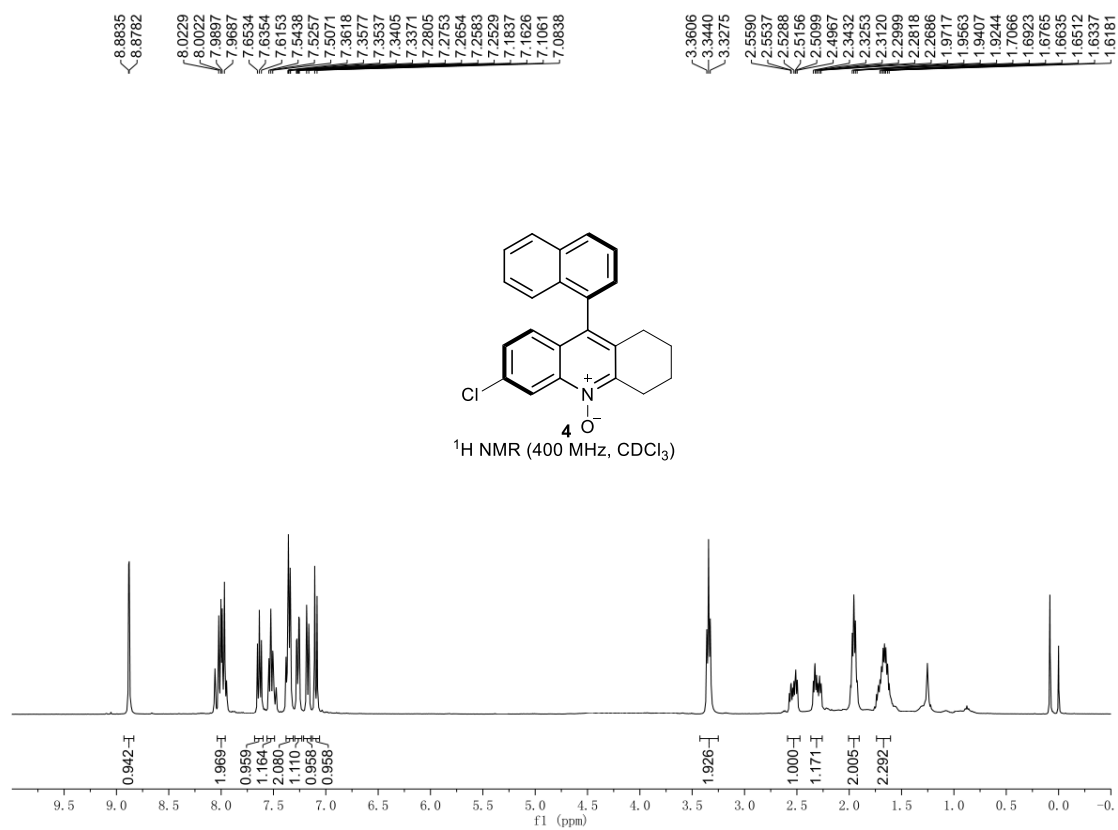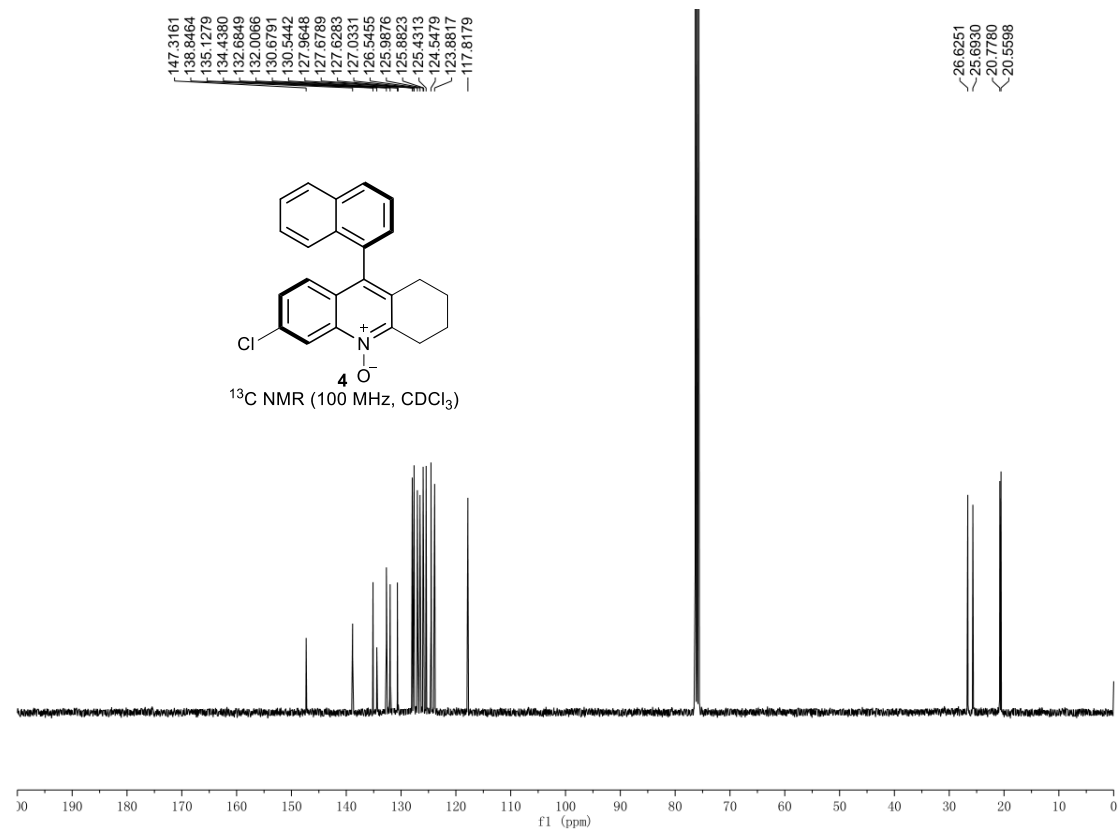

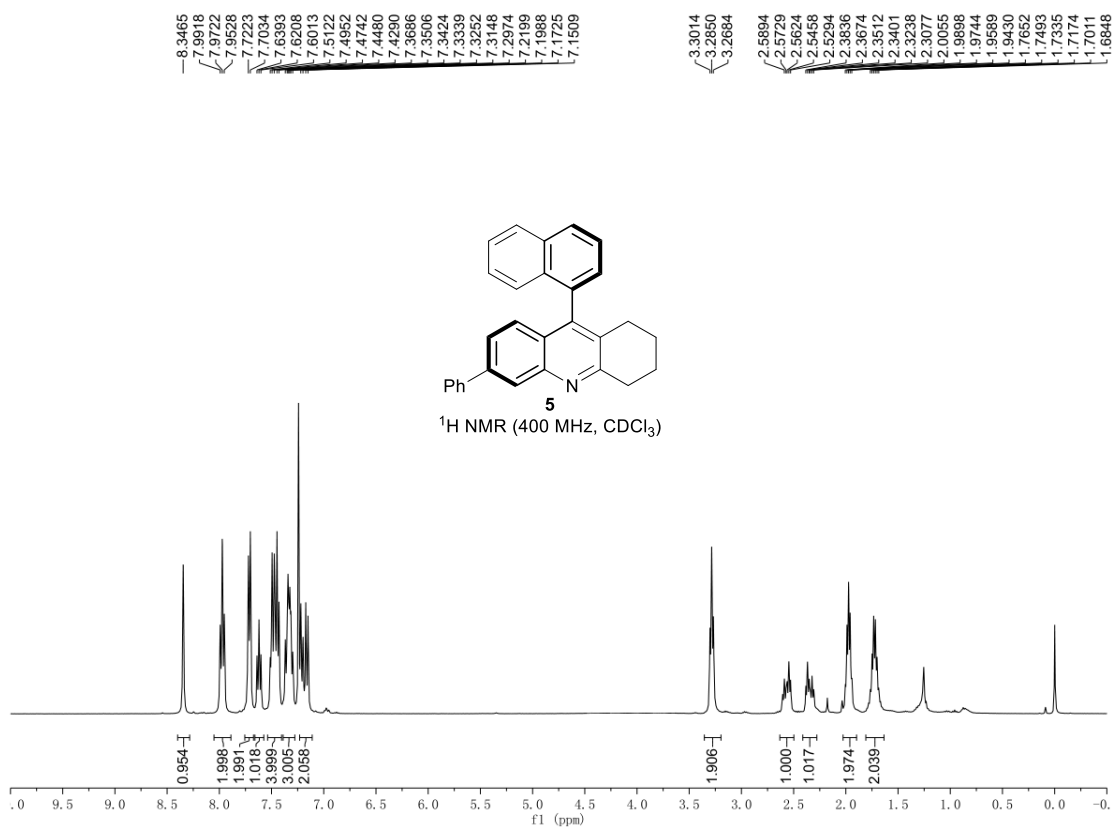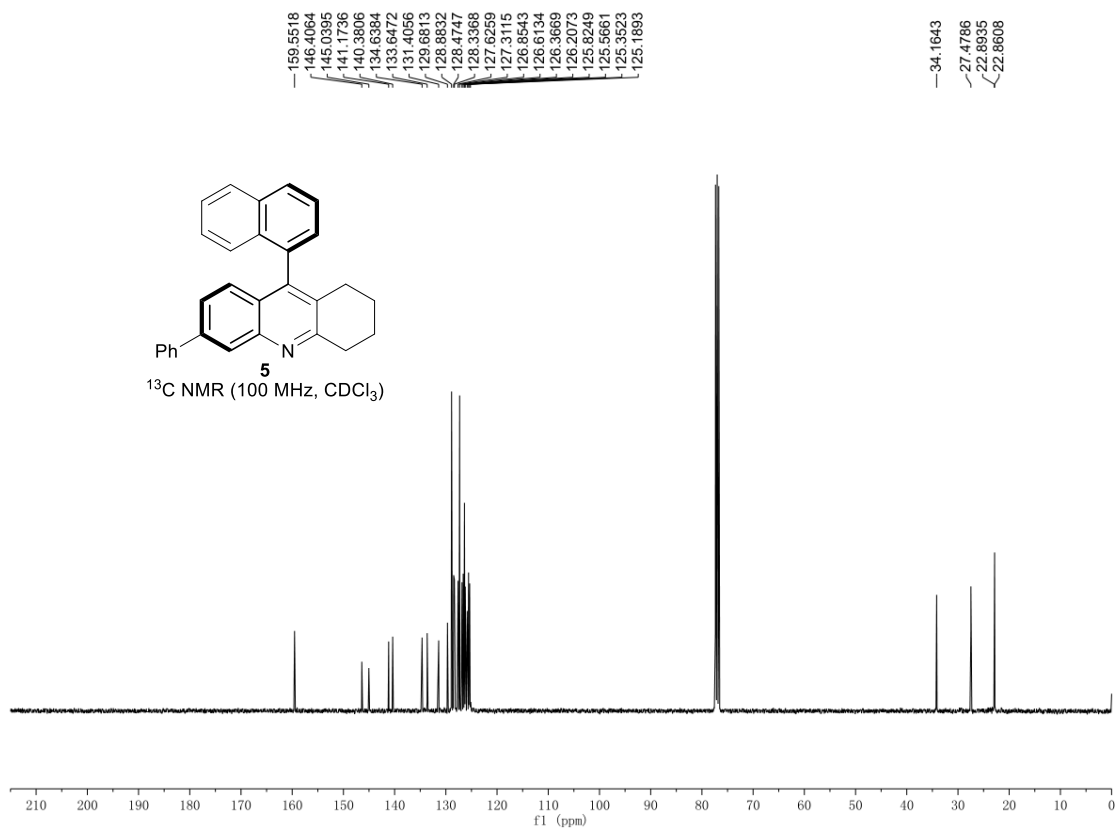

8.3320  
8.3269  
8.3093  
8.2874  
8.1131  
8.0923  
8.0348  
8.0142  
7.8107  
7.7915  
7.7720  
7.7522  
7.7033  
7.6839  
7.5356  
7.5171  
7.5003  
7.4839  
7.4456  
7.4239  
7.4001  
7.3770  
7.3619  
7.3438  
7.3238  
7.2630  
7.2512  
7.2449  
7.2093  
7.0027  
6.9815

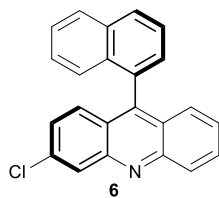

$^1\text{H NMR}$  (400 MHz,  $\text{CDCl}_3$ )

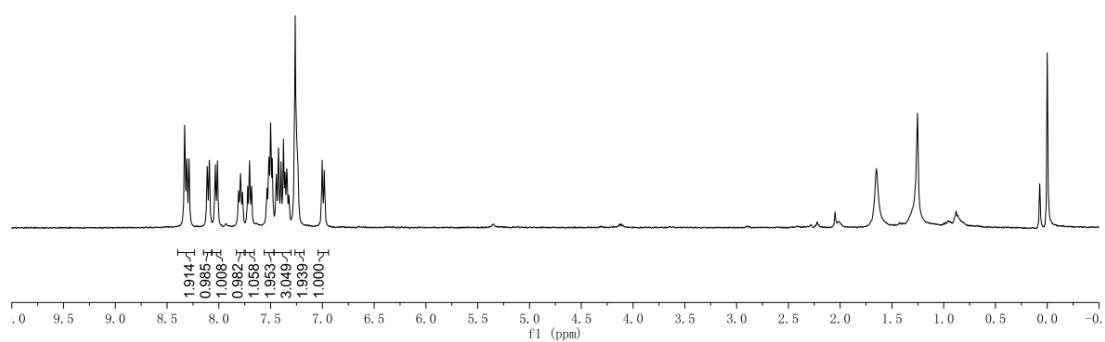

148.3212  
147.7011  
145.1956  
135.2437  
132.4651  
132.0923  
131.4241  
129.8662  
129.7060  
128.5285  
128.1132  
127.7926  
127.3805  
127.0275  
126.0794  
125.9773  
125.7891  
125.3564  
125.0662  
124.9653  
124.8468  
124.2599  
123.3226

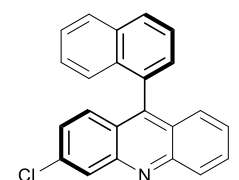

$^{13}\text{C NMR}$  (100 MHz,  $\text{CDCl}_3$ )

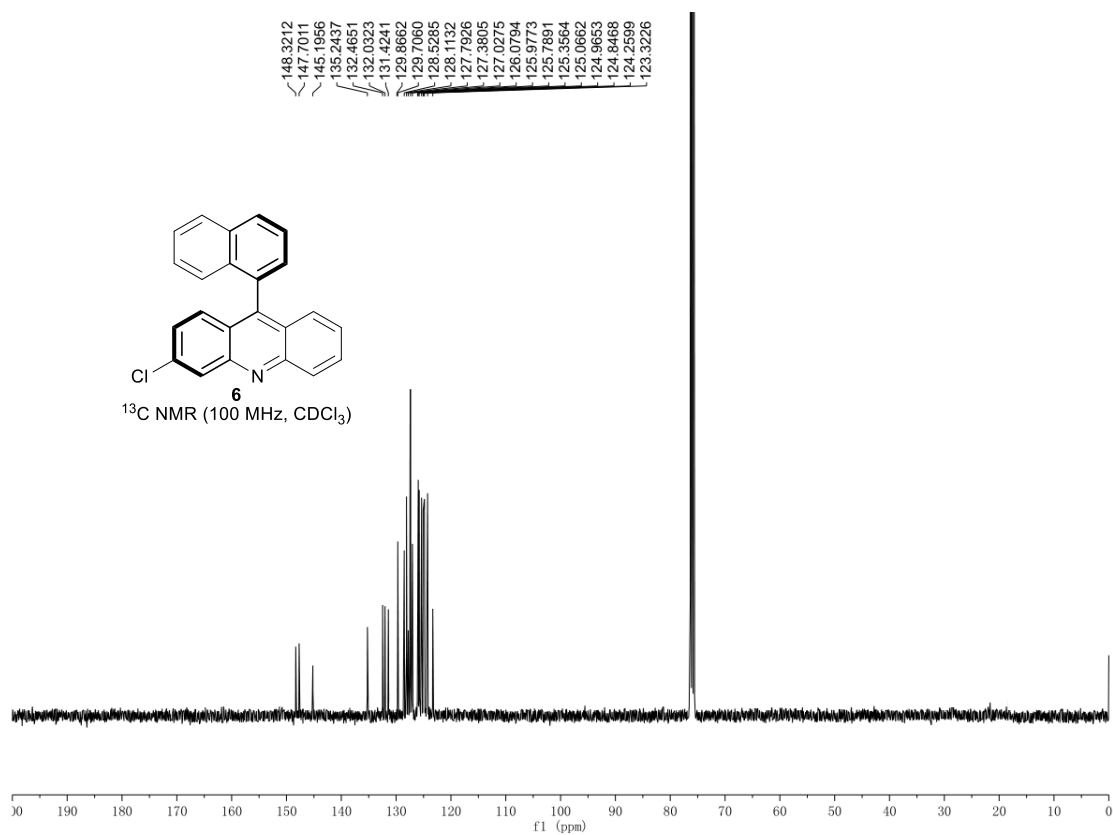



## HPLC Traces

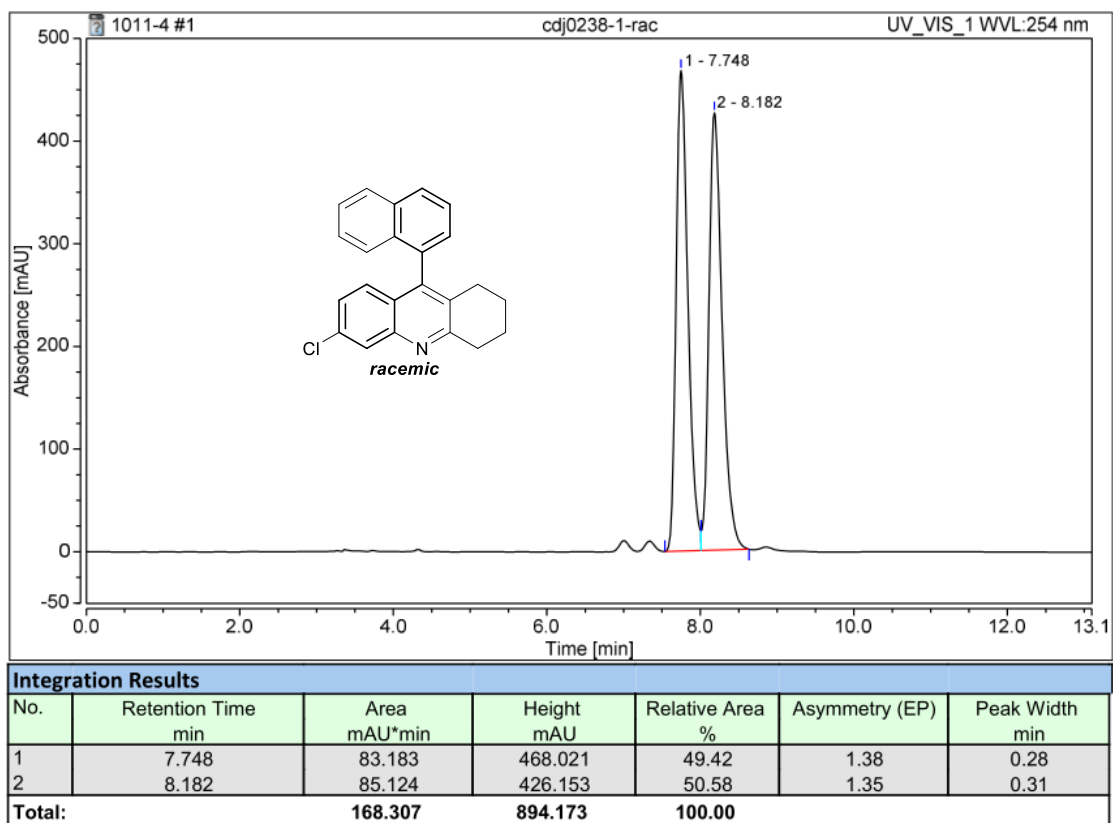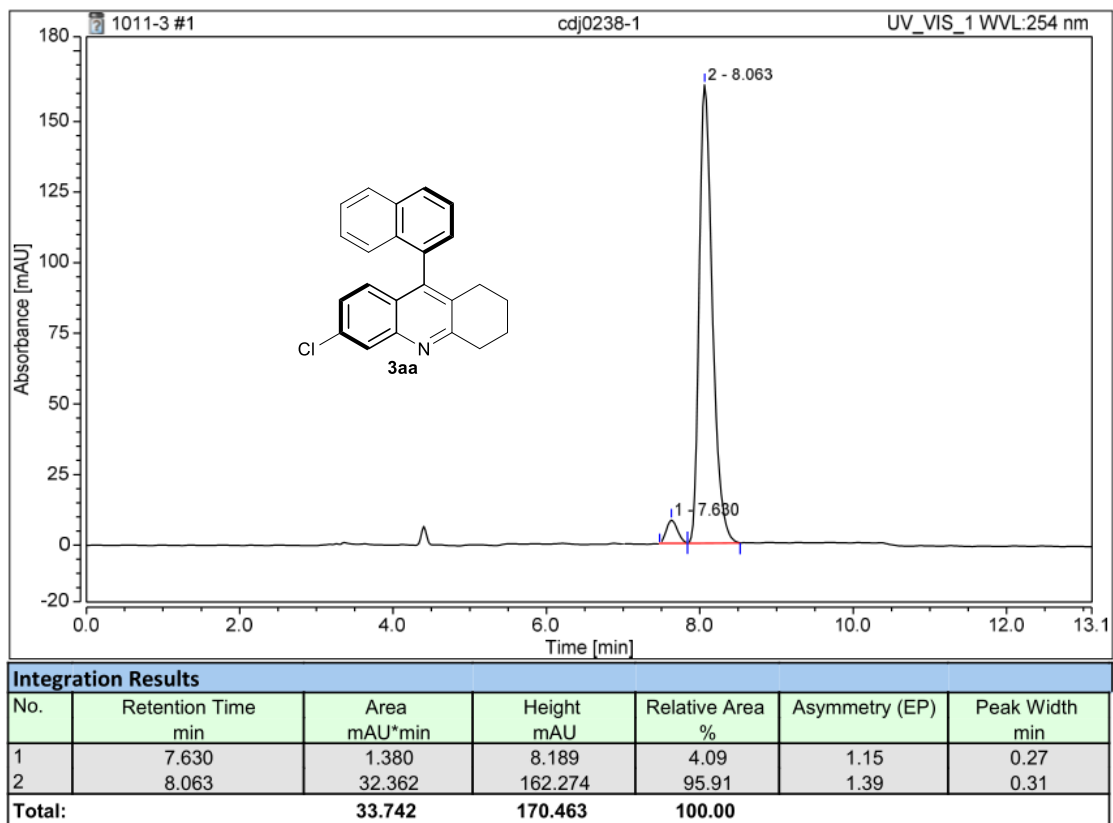

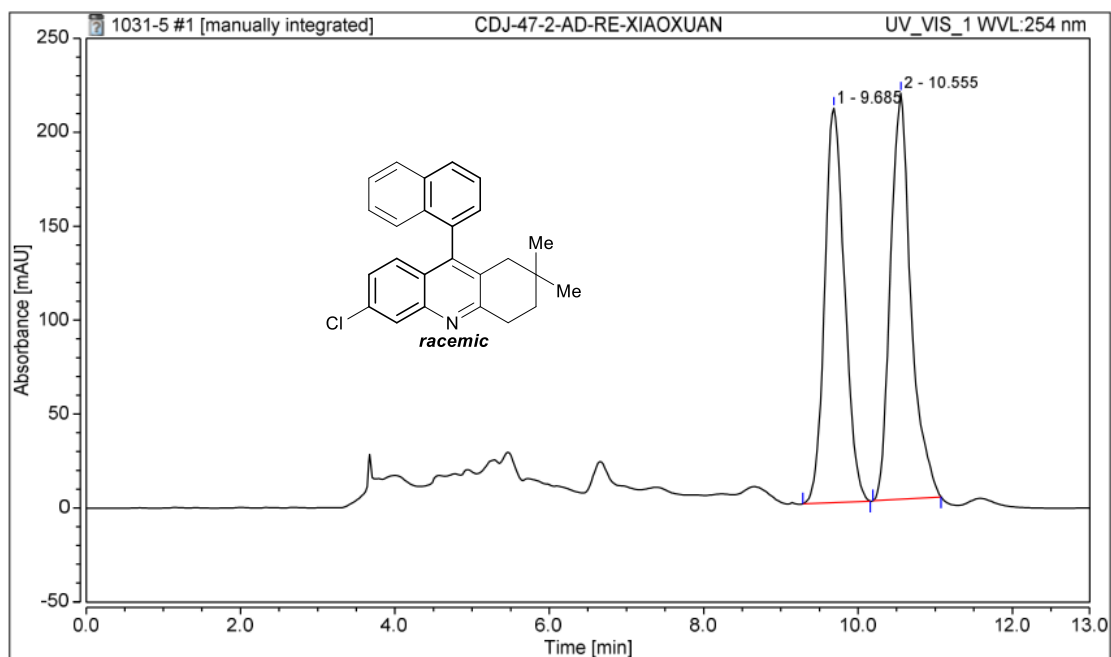

| Integration Results |                       |                 |                |                    |                |                   |
|---------------------|-----------------------|-----------------|----------------|--------------------|----------------|-------------------|
| No.                 | Retention Time<br>min | Area<br>mAU*min | Height<br>mAU  | Relative Area<br>% | Asymmetry (EP) | Peak Width<br>min |
| 1                   | 9.685                 | 62.749          | 210.040        | 48.46              | 1.13           | 0.45              |
| 2                   | 10.555                | 66.745          | 216.242        | 51.54              | 1.25           | 0.44              |
| <b>Total:</b>       |                       | <b>129.495</b>  | <b>426.282</b> | <b>100.00</b>      |                |                   |

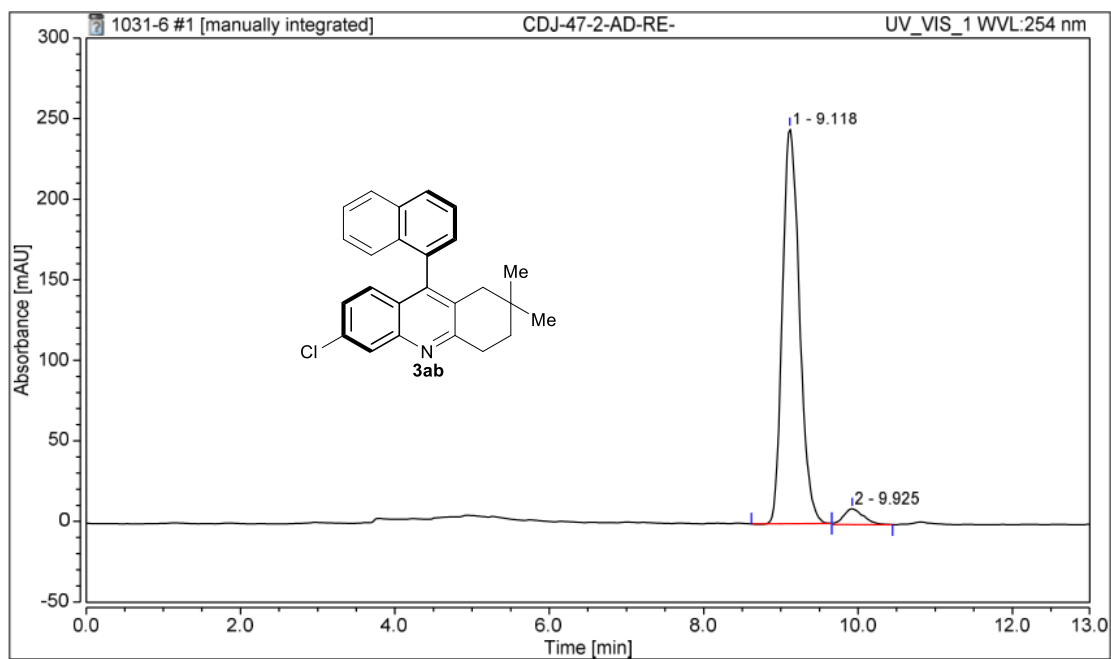

| Integration Results |                       |                 |                |                    |                |                   |
|---------------------|-----------------------|-----------------|----------------|--------------------|----------------|-------------------|
| No.                 | Retention Time<br>min | Area<br>mAU*min | Height<br>mAU  | Relative Area<br>% | Asymmetry (EP) | Peak Width<br>min |
| 1                   | 9.118                 | 62.733          | 245.102        | 95.59              | 1.23           | 0.50              |
| 2                   | 9.925                 | 2.892           | 9.725          | 4.41               | n.a.           | 0.43              |
| <b>Total:</b>       |                       | <b>65.626</b>   | <b>254.827</b> | <b>100.00</b>      |                |                   |

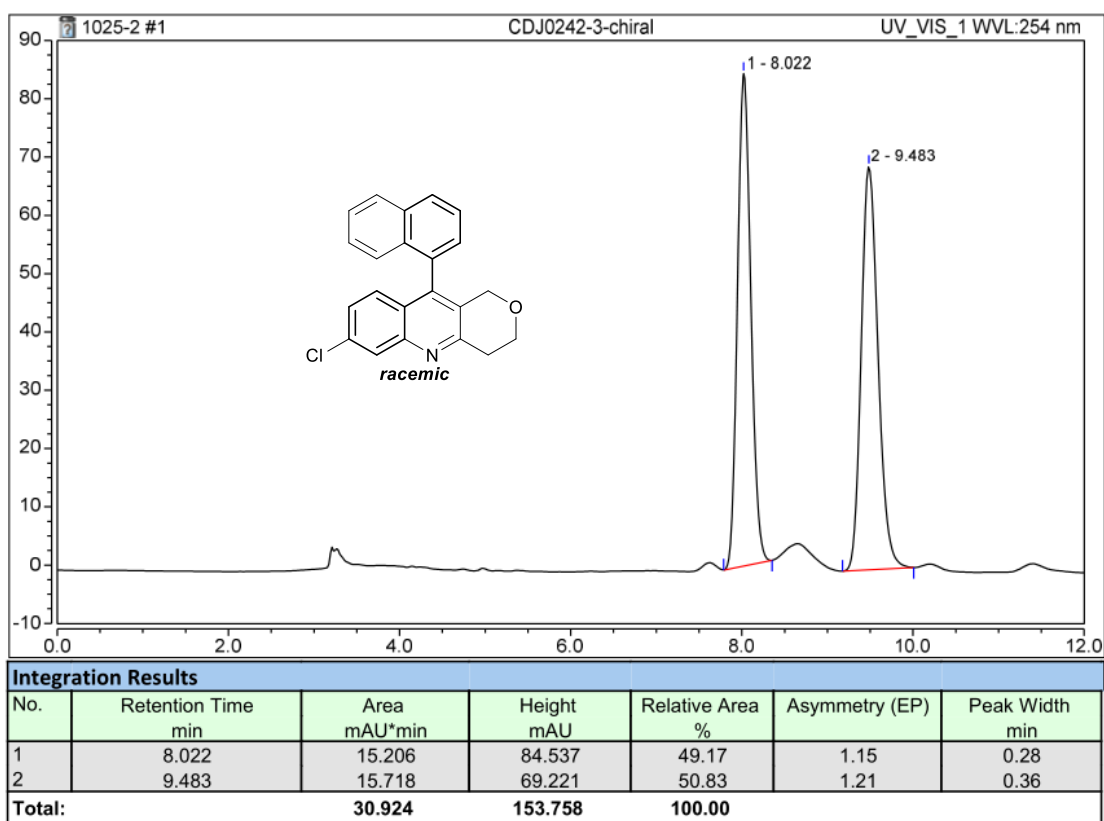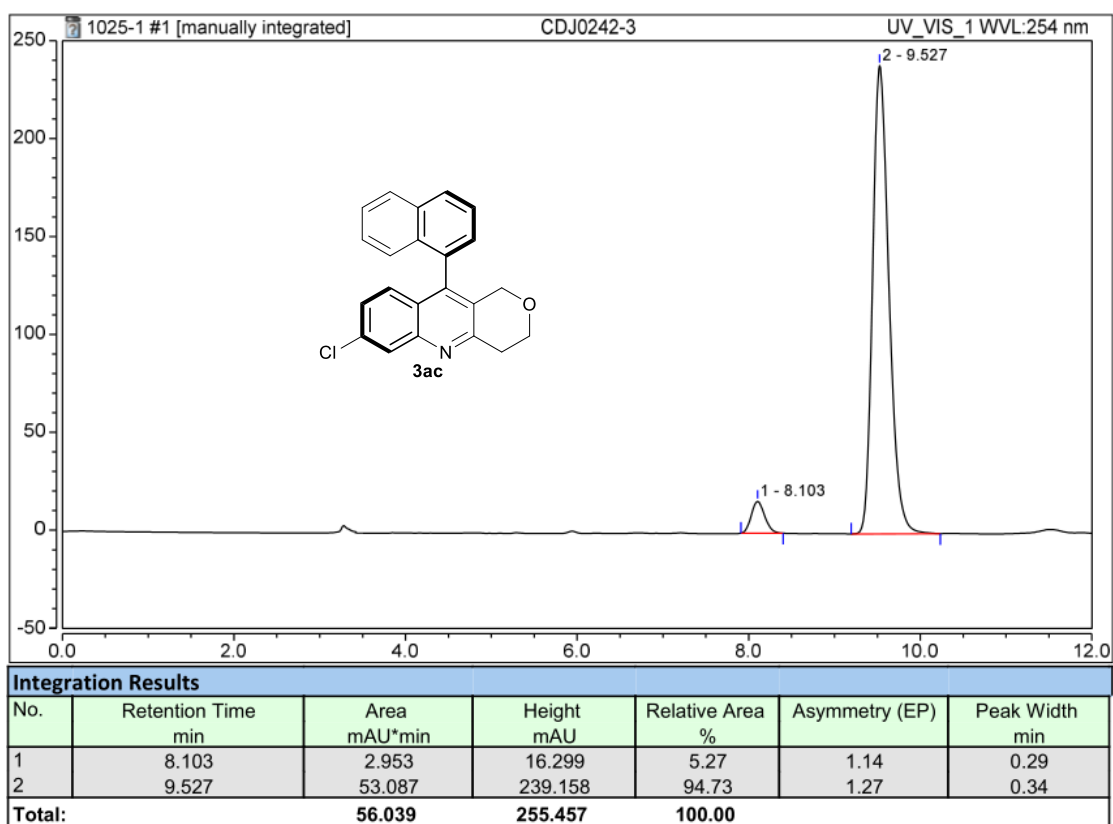

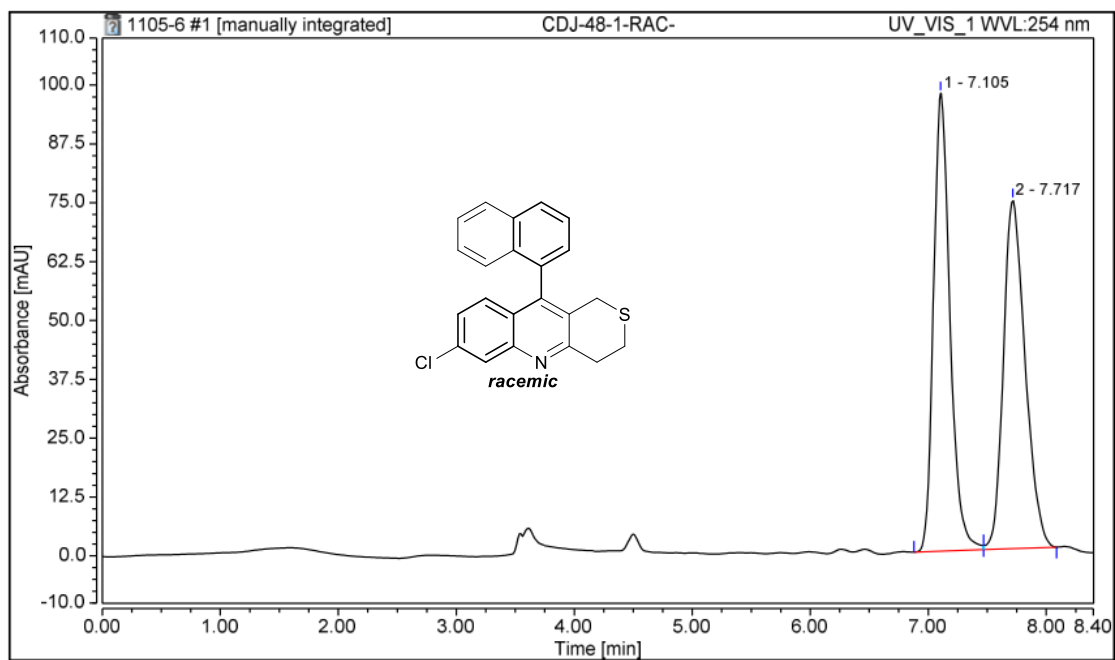

| Integration Results |                       |                 |                |                    |                |                   |
|---------------------|-----------------------|-----------------|----------------|--------------------|----------------|-------------------|
| No.                 | Retention Time<br>min | Area<br>mAU*min | Height<br>mAU  | Relative Area<br>% | Asymmetry (EP) | Peak Width<br>min |
| 1                   | 7.105                 | 15.659          | 97.336         | 49.77              | 1.29           | 0.24              |
| 2                   | 7.717                 | 15.806          | 74.080         | 50.23              | 1.25           | 0.32              |
| <b>Total:</b>       |                       | <b>31.465</b>   | <b>171.416</b> | <b>100.00</b>      |                |                   |

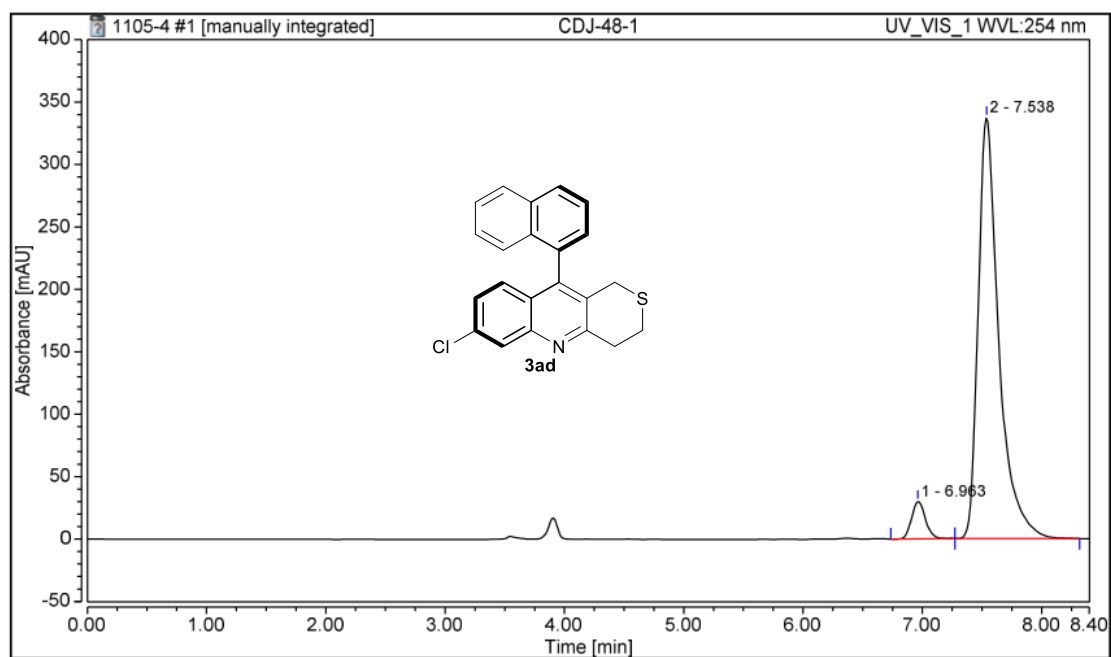

| Integration Results |                       |                 |                |                    |                |                   |
|---------------------|-----------------------|-----------------|----------------|--------------------|----------------|-------------------|
| No.                 | Retention Time<br>min | Area<br>mAU*min | Height<br>mAU  | Relative Area<br>% | Asymmetry (EP) | Peak Width<br>min |
| 1                   | 6.963                 | 3.994           | 29.872         | 5.58               | 1.14           | 0.21              |
| 2                   | 7.538                 | 67.542          | 337.078        | 94.42              | 1.60           | 0.29              |
| <b>Total:</b>       |                       | <b>71.536</b>   | <b>366.950</b> | <b>100.00</b>      |                |                   |

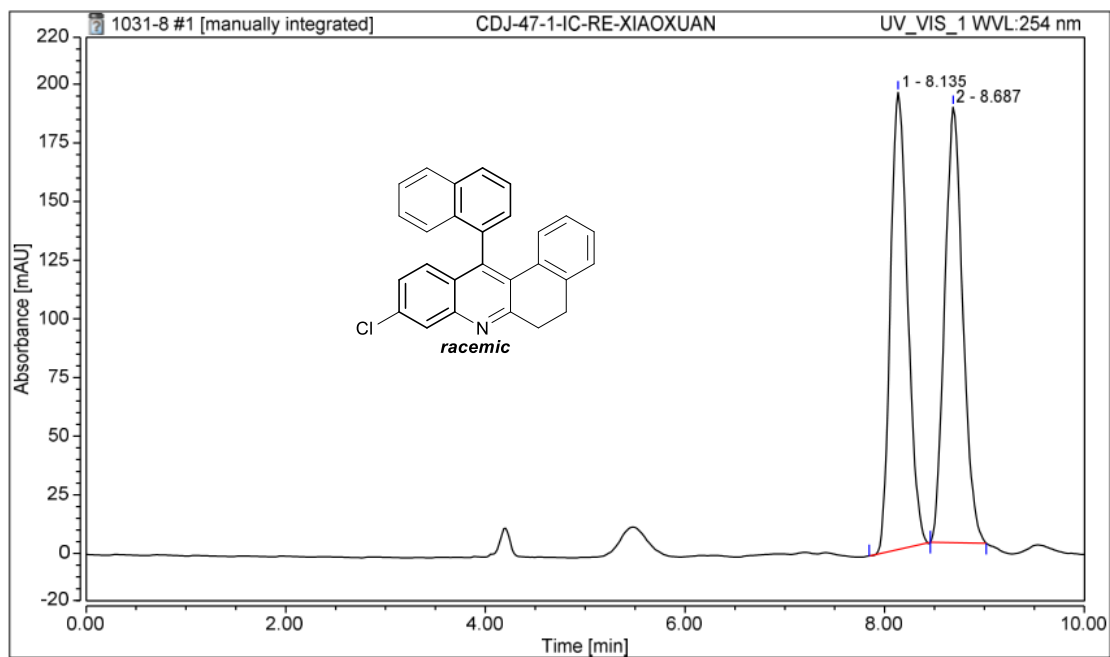

| Integration Results |                    |               |                |                 |                |                |
|---------------------|--------------------|---------------|----------------|-----------------|----------------|----------------|
| No.                 | Retention Time min | Area mAU*min  | Height mAU     | Relative Area % | Asymmetry (EP) | Peak Width min |
| 1                   | 8.135              | 38.689        | 194.888        | 49.82           | 1.20           | 0.30           |
| 2                   | 8.687              | 38.962        | 185.792        | 50.18           | 1.15           | 0.35           |
| <b>Total:</b>       |                    | <b>77.651</b> | <b>380.680</b> | <b>100.00</b>   |                |                |

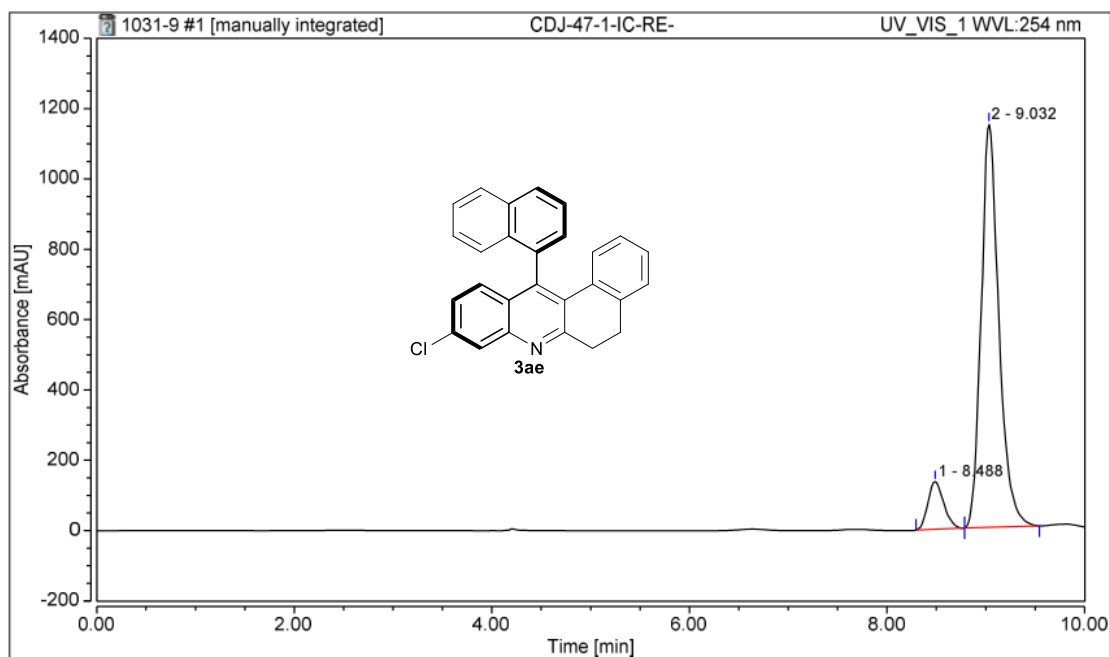

| Integration Results |                    |                |                 |                 |                |                |
|---------------------|--------------------|----------------|-----------------|-----------------|----------------|----------------|
| No.                 | Retention Time min | Area mAU*min   | Height mAU      | Relative Area % | Asymmetry (EP) | Peak Width min |
| 1                   | 8.488              | 24.874         | 134.761         | 9.46            | 1.18           | 0.29           |
| 2                   | 9.032              | 238.190        | 1146.390        | 90.54           | 1.26           | 0.30           |
| <b>Total:</b>       |                    | <b>263.064</b> | <b>1281.151</b> | <b>100.00</b>   |                |                |

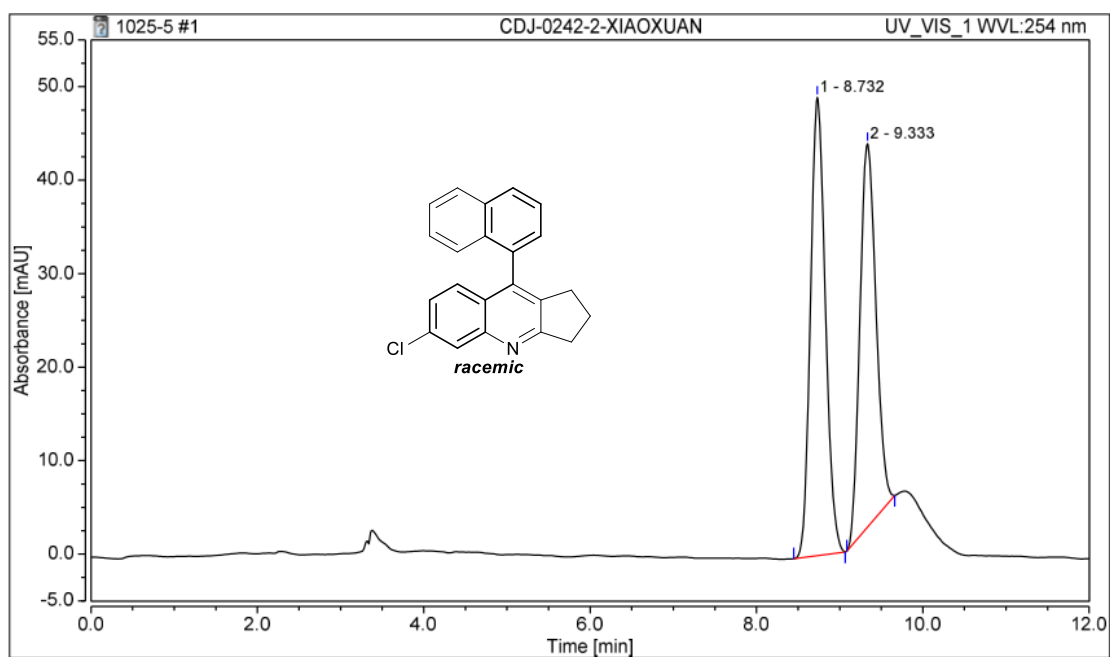

| Integration Results |                       |                 |               |                    |                |                   |
|---------------------|-----------------------|-----------------|---------------|--------------------|----------------|-------------------|
| No.                 | Retention Time<br>min | Area<br>mAU*min | Height<br>mAU | Relative Area<br>% | Asymmetry (EP) | Peak Width<br>min |
| 1                   | 8.732                 | 10.153          | 49.049        | 52.53              | 1.15           | 0.32              |
| 2                   | 9.333                 | 9.175           | 41.025        | 47.47              | 1.15           | 0.36              |
| <b>Total:</b>       |                       | <b>19.328</b>   | <b>90.074</b> | <b>100.00</b>      |                |                   |

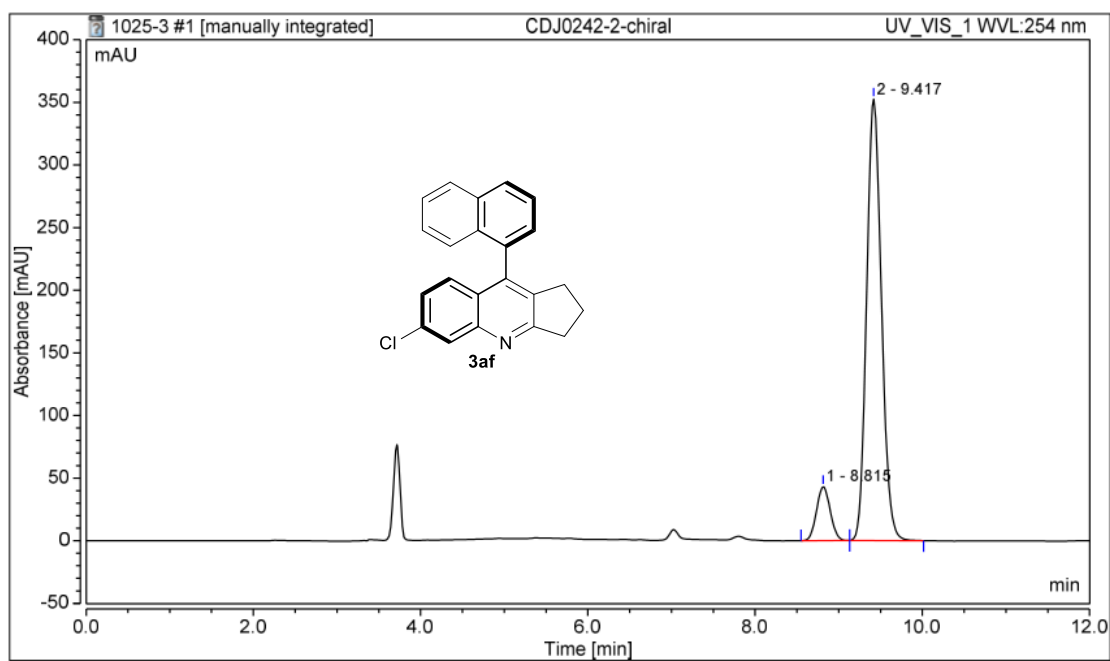

| Integration Results |                       |                 |                |                    |                |                   |
|---------------------|-----------------------|-----------------|----------------|--------------------|----------------|-------------------|
| No.                 | Retention Time<br>min | Area<br>mAU*min | Height<br>mAU  | Relative Area<br>% | Asymmetry (EP) | Peak Width<br>min |
| 1                   | 8.815                 | 8.136           | 43.043         | 10.11              | 1.06           | 0.30              |
| 2                   | 9.417                 | 72.347          | 352.439        | 89.89              | 1.13           | 0.33              |
| <b>Total:</b>       |                       | <b>80.483</b>   | <b>395.482</b> | <b>100.00</b>      |                |                   |

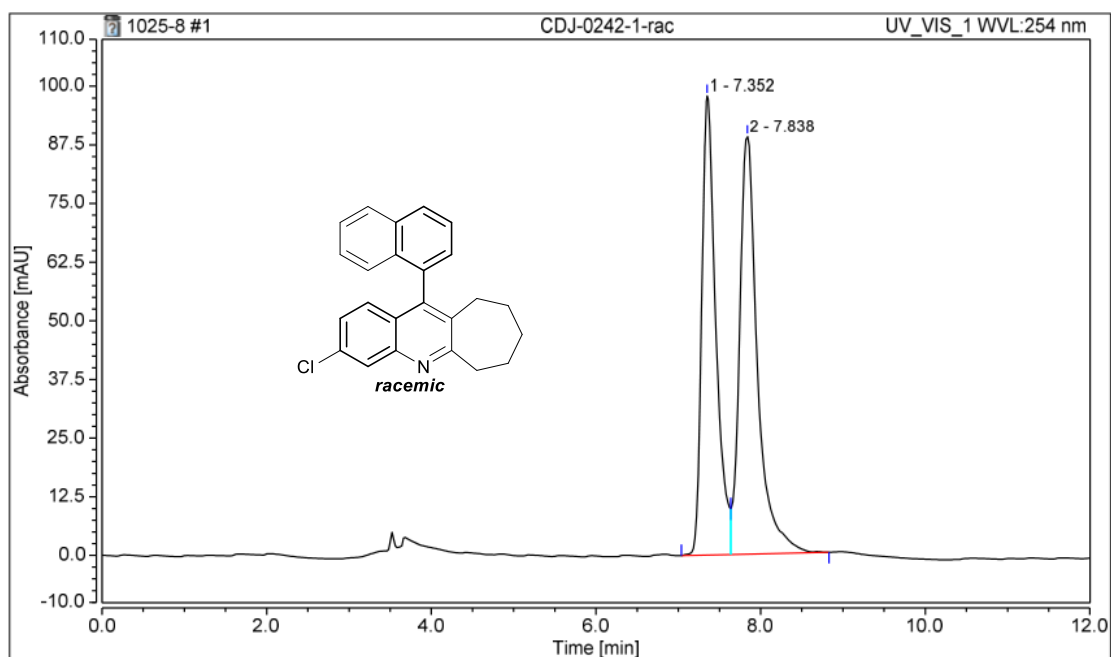

| Integration Results |                       |                 |                |                    |                |                   |
|---------------------|-----------------------|-----------------|----------------|--------------------|----------------|-------------------|
| No.                 | Retention Time<br>min | Area<br>mAU*min | Height<br>mAU  | Relative Area<br>% | Asymmetry (EP) | Peak Width<br>min |
| 1                   | 7.352                 | 19.385          | 97.895         | 46.28              | n.a.           | 0.29              |
| 2                   | 7.838                 | 22.501          | 89.051         | 53.72              | n.a.           | 0.35              |
| <b>Total:</b>       |                       | <b>41.885</b>   | <b>186.947</b> | <b>100.00</b>      |                |                   |

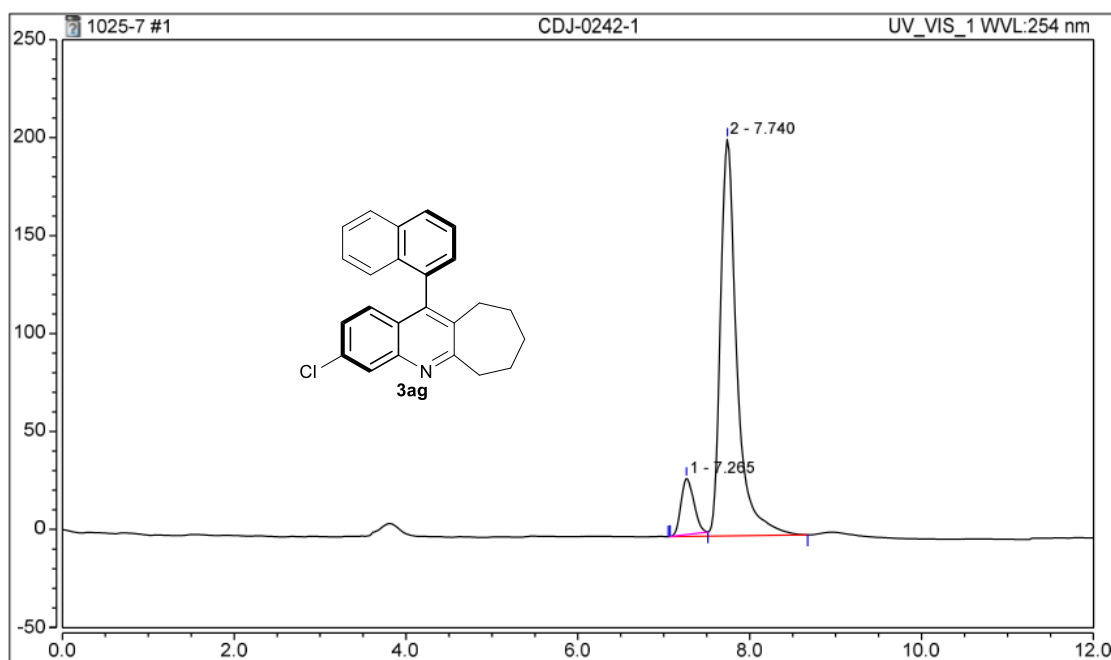

| Integration Results |                       |                 |                |                    |                |                   |
|---------------------|-----------------------|-----------------|----------------|--------------------|----------------|-------------------|
| No.                 | Retention Time<br>min | Area<br>mAU*min | Height<br>mAU  | Relative Area<br>% | Asymmetry (EP) | Peak Width<br>min |
| 1                   | 7.265                 | 4.923           | 28.669         | 9.84               | n.a.           | n.a.              |
| 2                   | 7.740                 | 45.128          | 202.541        | 90.16              | 1.55           | 0.31              |
| <b>Total:</b>       |                       | <b>50.051</b>   | <b>231.210</b> | <b>100.00</b>      |                |                   |

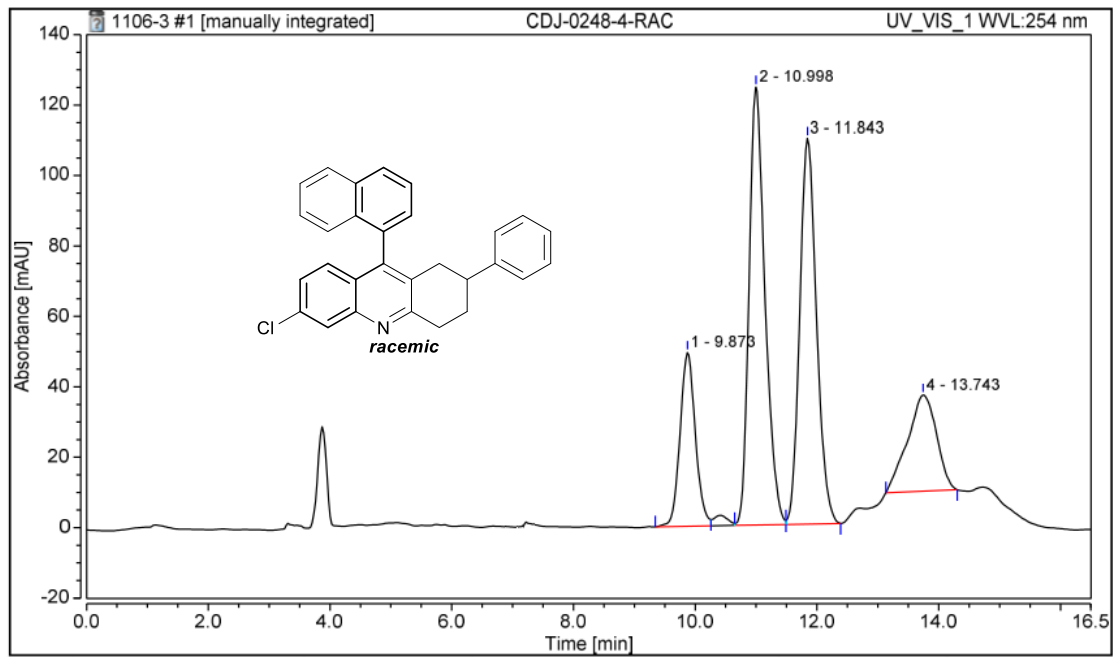

| Integration Results |                    |                |                |                 |                |                |
|---------------------|--------------------|----------------|----------------|-----------------|----------------|----------------|
| No.                 | Retention Time min | Area mAU*min   | Height mAU     | Relative Area % | Asymmetry (EP) | Peak Width min |
| 1                   | 9.873              | 14.415         | 49.400         | 14.11           | 1.11           | 0.45           |
| 2                   | 10.998             | 37.722         | 124.412        | 36.93           | 1.28           | 0.46           |
| 3                   | 11.843             | 34.946         | 109.596        | 34.22           | 1.17           | 0.52           |
| 4                   | 13.743             | 15.052         | 27.353         | 14.74           | 0.91           | 0.92           |
| <b>Total:</b>       |                    | <b>102.136</b> | <b>310.762</b> | <b>100.00</b>   |                |                |

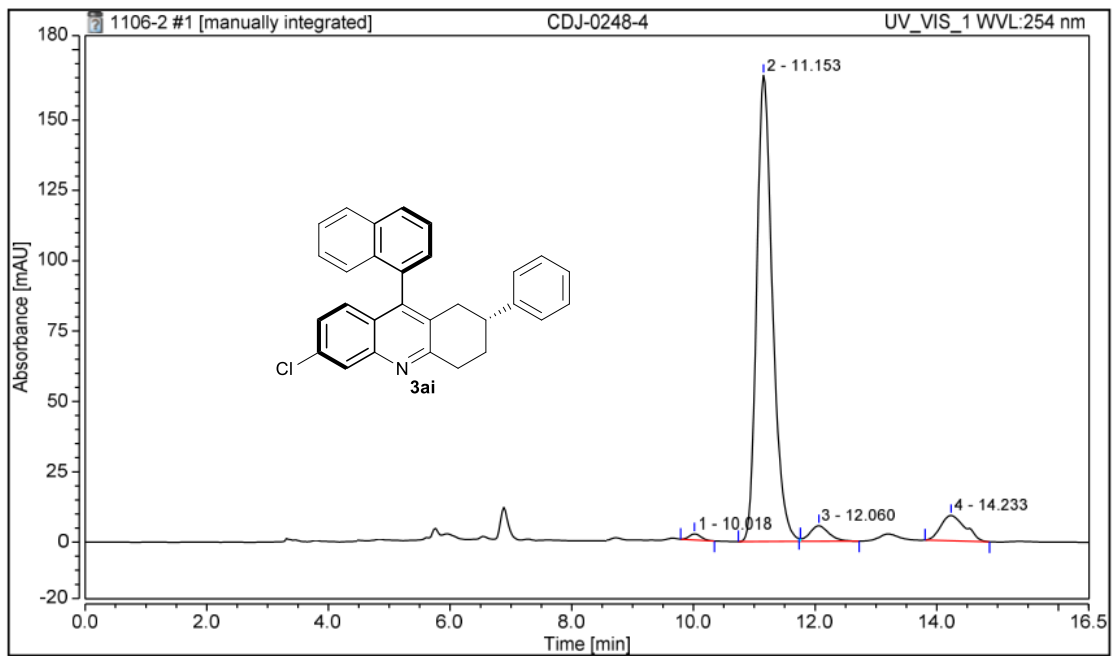

| Integration Results |                    |               |                |                 |                |                |
|---------------------|--------------------|---------------|----------------|-----------------|----------------|----------------|
| No.                 | Retention Time min | Area mAU*min  | Height mAU     | Relative Area % | Asymmetry (EP) | Peak Width min |
| 1                   | 10.018             | 0.468         | 2.131          | 0.83            | 1.13           | 0.34           |
| 2                   | 11.153             | 49.944        | 165.678        | 88.24           | 1.28           | 0.45           |
| 3                   | 12.060             | 2.004         | 5.513          | 3.54            | n.a.           | 0.58           |
| 4                   | 14.233             | 4.184         | 8.950          | 7.39            | 1.21           | 0.74           |
| <b>Total:</b>       |                    | <b>56.600</b> | <b>182.271</b> | <b>100.00</b>   |                |                |



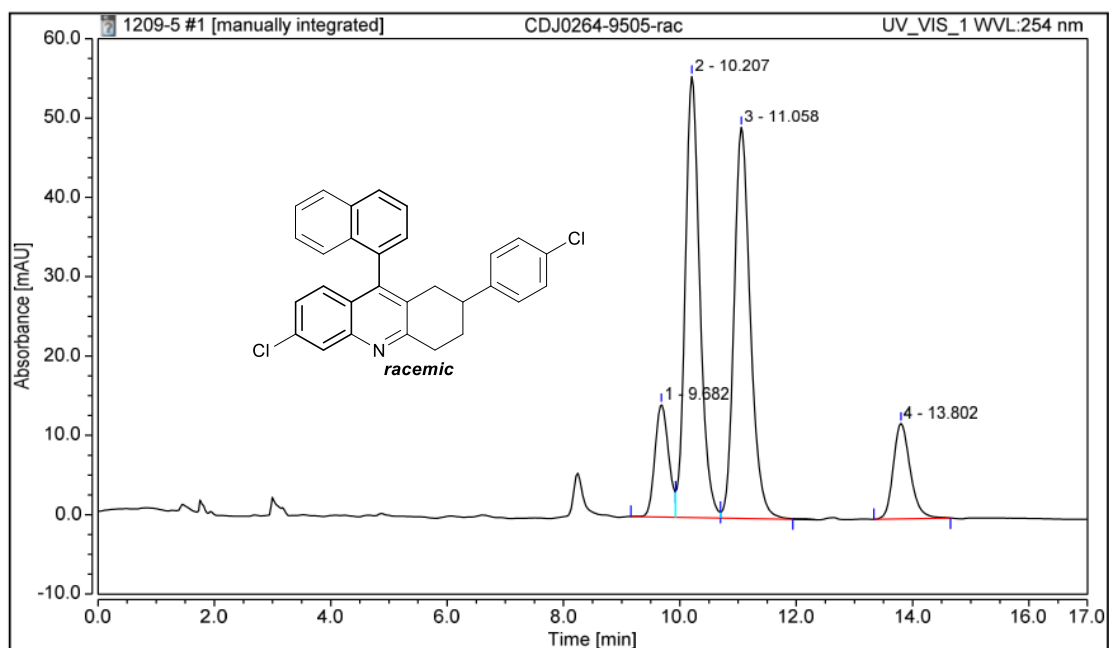

| Integration Results |                       |                 |                |                    |                |                   |
|---------------------|-----------------------|-----------------|----------------|--------------------|----------------|-------------------|
| No.                 | Retention Time<br>min | Area<br>mAU*min | Height<br>mAU  | Relative Area<br>% | Asymmetry (EP) | Peak Width<br>min |
| 1                   | 9.682                 | 3.858           | 14.188         | 9.64               | n.a.           | 0.44              |
| 2                   | 10.207                | 16.127          | 55.607         | 40.29              | n.a.           | 0.45              |
| 3                   | 11.058                | 15.968          | 49.304         | 39.89              | 1.23           | 0.50              |
| 4                   | 13.802                | 4.077           | 12.057         | 10.19              | 1.21           | 0.52              |
| <b>Total:</b>       |                       | <b>40.030</b>   | <b>131.156</b> | <b>100.00</b>      |                |                   |

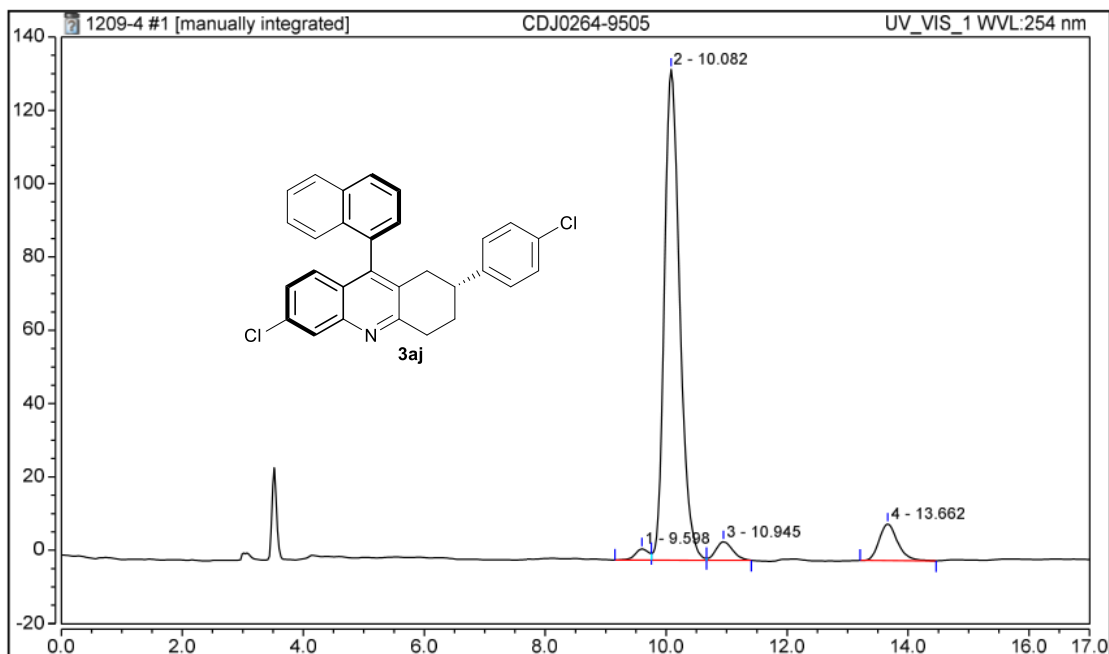

| Integration Results |                       |                 |                |                    |                |                   |
|---------------------|-----------------------|-----------------|----------------|--------------------|----------------|-------------------|
| No.                 | Retention Time<br>min | Area<br>mAU*min | Height<br>mAU  | Relative Area<br>% | Asymmetry (EP) | Peak Width<br>min |
| 1                   | 9.598                 | 0.793           | 3.055          | 1.75               | n.a.           | 0.49              |
| 2                   | 10.082                | 39.503          | 133.931        | 86.90              | 1.27           | 0.46              |
| 3                   | 10.945                | 1.635           | 5.024          | 3.60               | n.a.           | 0.51              |
| 4                   | 13.662                | 3.526           | 9.967          | 7.76               | 1.22           | 0.55              |
| <b>Total:</b>       |                       | <b>45.457</b>   | <b>151.977</b> | <b>100.00</b>      |                |                   |

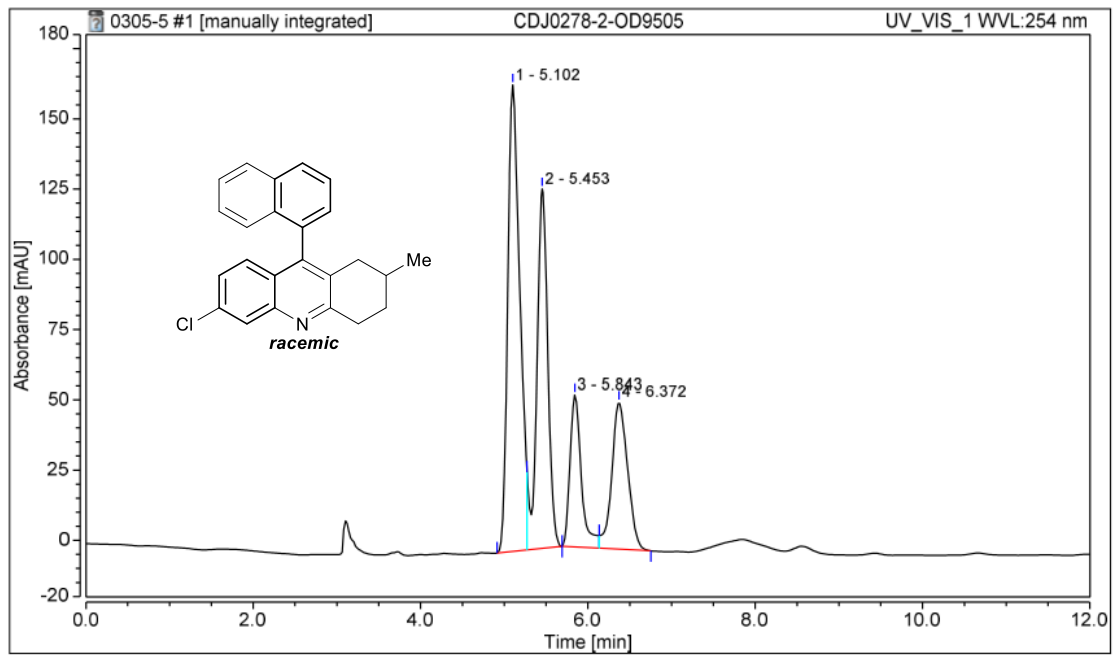

| Integration Results |                    |               |                |                 |                |                |
|---------------------|--------------------|---------------|----------------|-----------------|----------------|----------------|
| No.                 | Retention Time min | Area mAU*min  | Height mAU     | Relative Area % | Asymmetry (EP) | Peak Width min |
| 1                   | 5.102              | 23.542        | 165.999        | 35.27           | n.a.           | 0.27           |
| 2                   | 5.453              | 23.243        | 127.965        | 34.82           | n.a.           | 0.23           |
| 3                   | 5.843              | 9.893         | 54.133         | 14.82           | n.a.           | 0.23           |
| 4                   | 6.372              | 10.065        | 52.259         | 15.08           | n.a.           | 0.34           |
| <b>Total:</b>       |                    | <b>66.744</b> | <b>400.356</b> | <b>100.00</b>   |                |                |

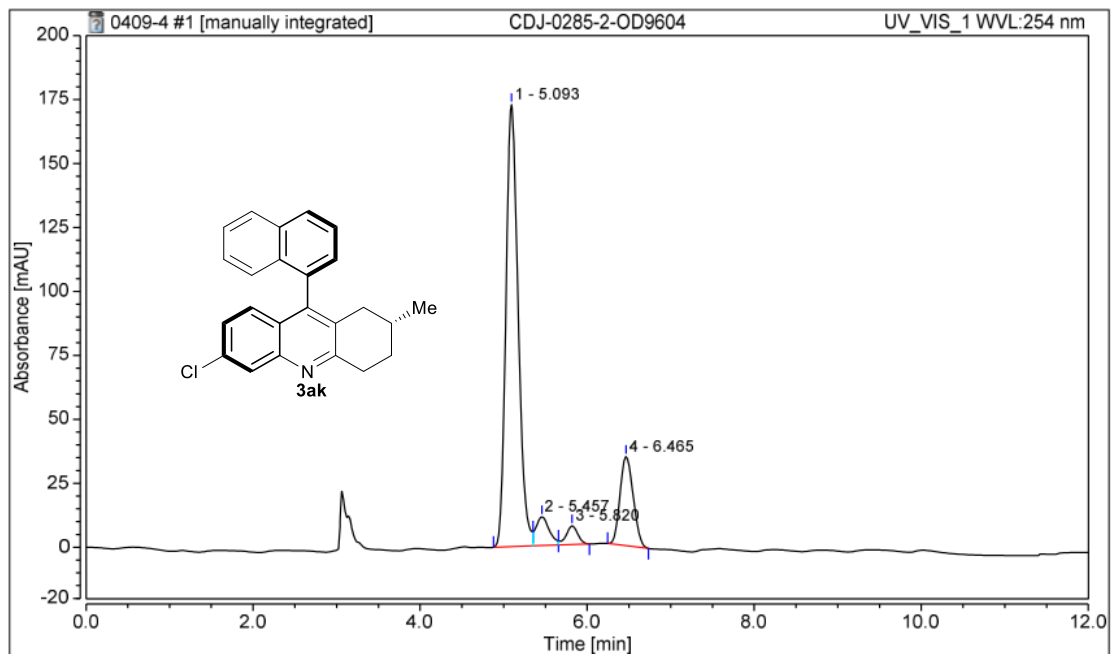

| Integration Results |                    |               |                |                 |                |                |
|---------------------|--------------------|---------------|----------------|-----------------|----------------|----------------|
| No.                 | Retention Time min | Area mAU*min  | Height mAU     | Relative Area % | Asymmetry (EP) | Peak Width min |
| 1                   | 5.093              | 29.232        | 172.834        | 75.25           | 1.22           | 0.27           |
| 2                   | 5.457              | 2.054         | 11.279         | 5.29            | n.a.           | 0.31           |
| 3                   | 5.820              | 1.177         | 7.302          | 3.03            | n.a.           | 0.25           |
| 4                   | 6.465              | 6.383         | 34.882         | 16.43           | 1.13           | 0.30           |
| <b>Total:</b>       |                    | <b>38.846</b> | <b>226.296</b> | <b>100.00</b>   |                |                |

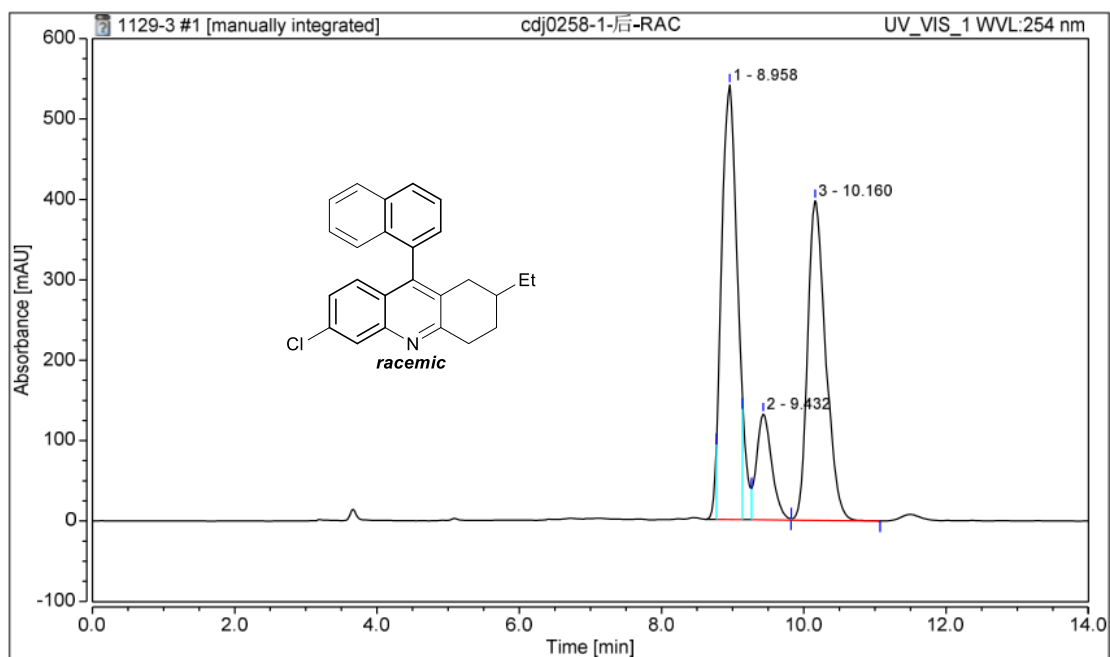

| Integration Results |                       |                 |                 |                    |                |                   |
|---------------------|-----------------------|-----------------|-----------------|--------------------|----------------|-------------------|
| No.                 | Retention Time<br>min | Area<br>mAU*min | Height<br>mAU   | Relative Area<br>% | Asymmetry (EP) | Peak Width<br>min |
| 1                   | 8.958                 | 128.773         | 540.529         | 46.90              | n.a.           | 0.43              |
| 2                   | 9.432                 | 128.773         | 131.718         | 11.60              | n.a.           | 0.39              |
| 3                   | 10.160                | 128.773         | 397.550         | 41.50              | 1.30           | 0.46              |
| <b>Total:</b>       |                       | <b>386.319</b>  | <b>1069.797</b> | <b>100.00</b>      |                |                   |

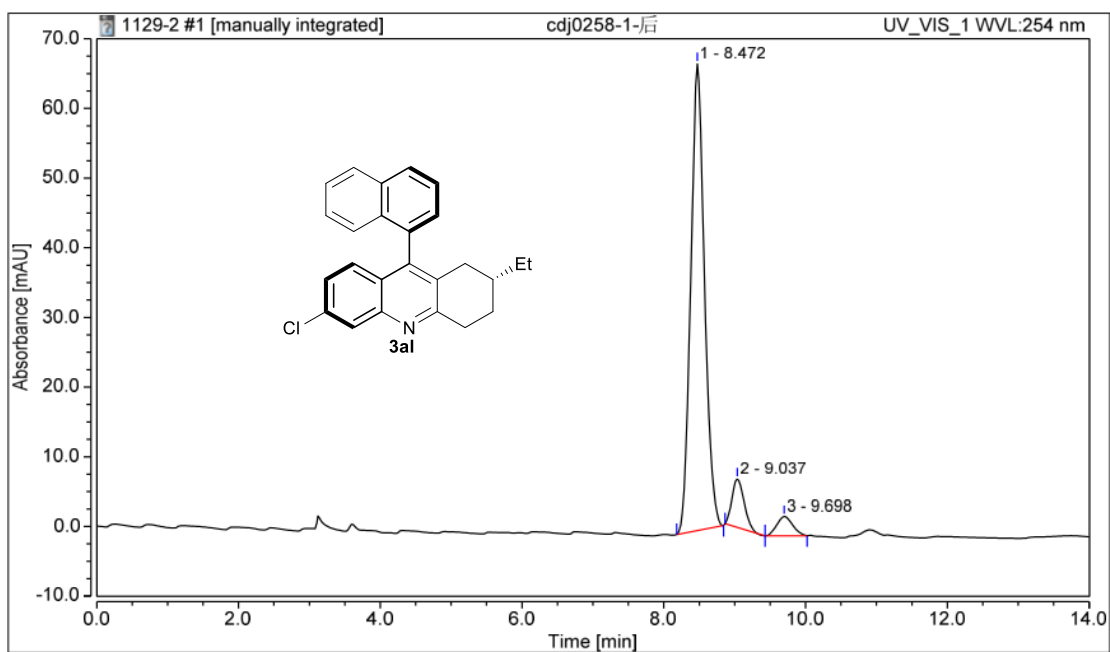

| Integration Results |                       |                 |               |                    |                |                   |
|---------------------|-----------------------|-----------------|---------------|--------------------|----------------|-------------------|
| No.                 | Retention Time<br>min | Area<br>mAU*min | Height<br>mAU | Relative Area<br>% | Asymmetry (EP) | Peak Width<br>min |
| 1                   | 8.472                 | 14.988          | 67.026        | 87.68              | 1.12           | 0.37              |
| 2                   | 9.037                 | 1.388           | 6.945         | 8.12               | 1.22           | 0.32              |
| 3                   | 9.698                 | 0.717           | 2.763         | 4.20               | 1.15           | 0.42              |
| <b>Total:</b>       |                       | <b>17.093</b>   | <b>76.734</b> | <b>100.00</b>      |                |                   |

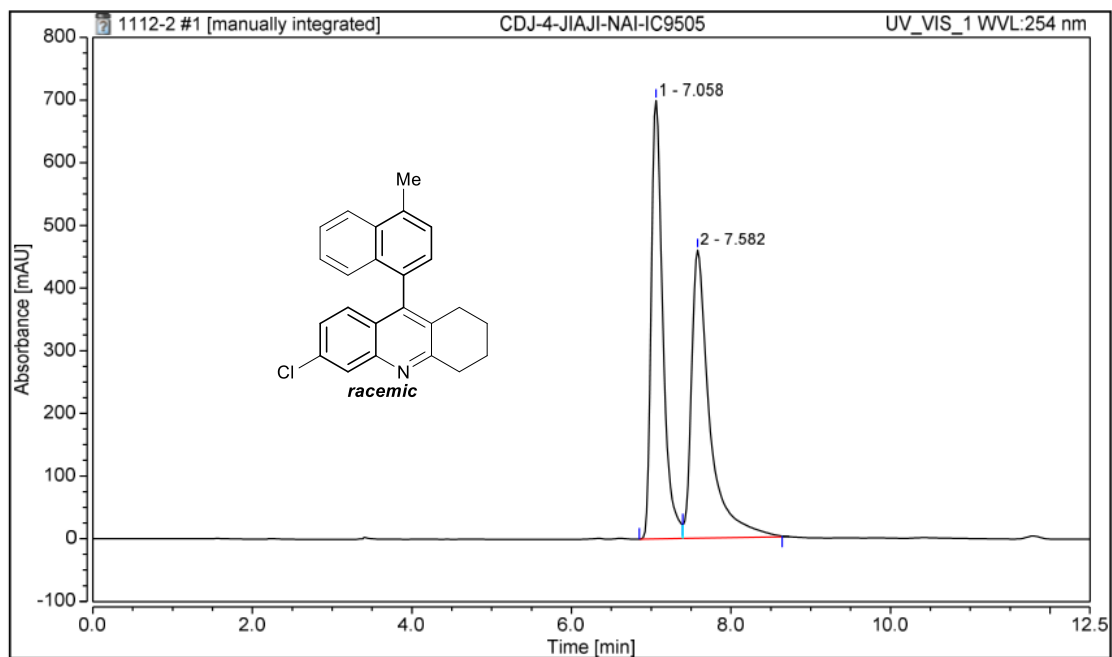

| Integration Results |                       |                 |                 |                    |                |                   |
|---------------------|-----------------------|-----------------|-----------------|--------------------|----------------|-------------------|
| No.                 | Retention Time<br>min | Area<br>mAU*min | Height<br>mAU   | Relative Area<br>% | Asymmetry (EP) | Peak Width<br>min |
| 1                   | 7.058                 | 118.124         | 699.523         | 49.37              | 1.62           | 0.25              |
| 2                   | 7.582                 | 121.148         | 460.024         | 50.63              | 2.09           | 0.34              |
| <b>Total:</b>       |                       | <b>239.272</b>  | <b>1159.548</b> | <b>100.00</b>      |                |                   |

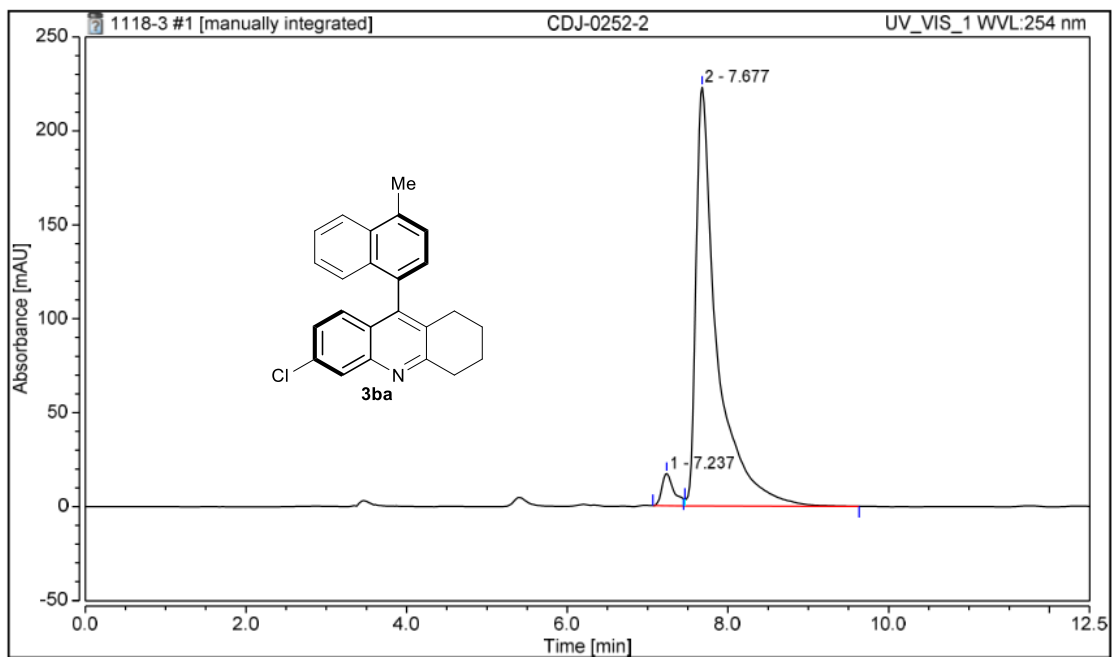

| Integration Results |                       |                 |                |                    |                |                   |
|---------------------|-----------------------|-----------------|----------------|--------------------|----------------|-------------------|
| No.                 | Retention Time<br>min | Area<br>mAU*min | Height<br>mAU  | Relative Area<br>% | Asymmetry (EP) | Peak Width<br>min |
| 1                   | 7.237                 | 2.943           | 17.145         | 4.20               | n.a.           | 0.25              |
| 2                   | 7.677                 | 67.049          | 222.881        | 95.80              | 2.75           | 0.37              |
| <b>Total:</b>       |                       | <b>69.992</b>   | <b>240.026</b> | <b>100.00</b>      |                |                   |

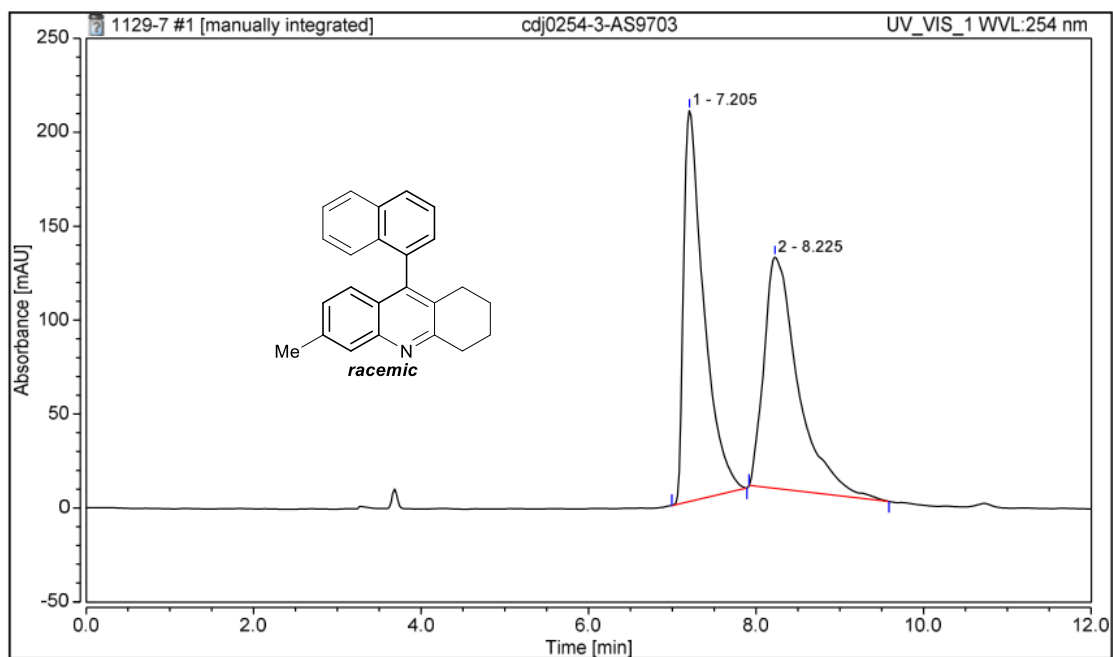

| Integration Results |                       |                 |                |                    |                |                   |
|---------------------|-----------------------|-----------------|----------------|--------------------|----------------|-------------------|
| No.                 | Retention Time<br>min | Area<br>mAU*min | Height<br>mAU  | Relative Area<br>% | Asymmetry (EP) | Peak Width<br>min |
| 1                   | 7.205                 | 58.289          | 208.278        | 50.00              | 2.38           | 0.41              |
| 2                   | 8.225                 | 58.285          | 123.108        | 50.00              | 1.98           | 0.64              |
| <b>Total:</b>       |                       | <b>116.574</b>  | <b>331.386</b> | <b>100.00</b>      |                |                   |

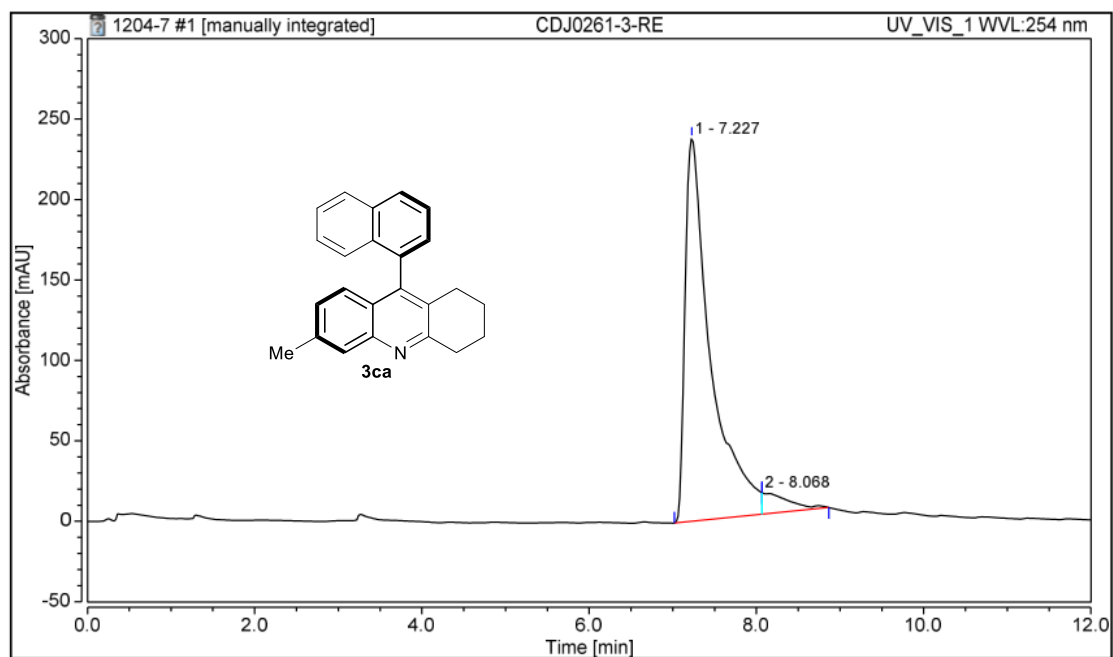

| Integration Results |                       |                 |                |                    |                |                   |
|---------------------|-----------------------|-----------------|----------------|--------------------|----------------|-------------------|
| No.                 | Retention Time<br>min | Area<br>mAU*min | Height<br>mAU  | Relative Area<br>% | Asymmetry (EP) | Peak Width<br>min |
| 1                   | 7.227                 | 83.757          | 238.103        | 94.78              | n.a.           | 0.45              |
| 2                   | 8.068                 | 4.615           | 13.263         | 5.22               | n.a.           | n.a.              |
| <b>Total:</b>       |                       | <b>88.372</b>   | <b>251.366</b> | <b>100.00</b>      |                |                   |

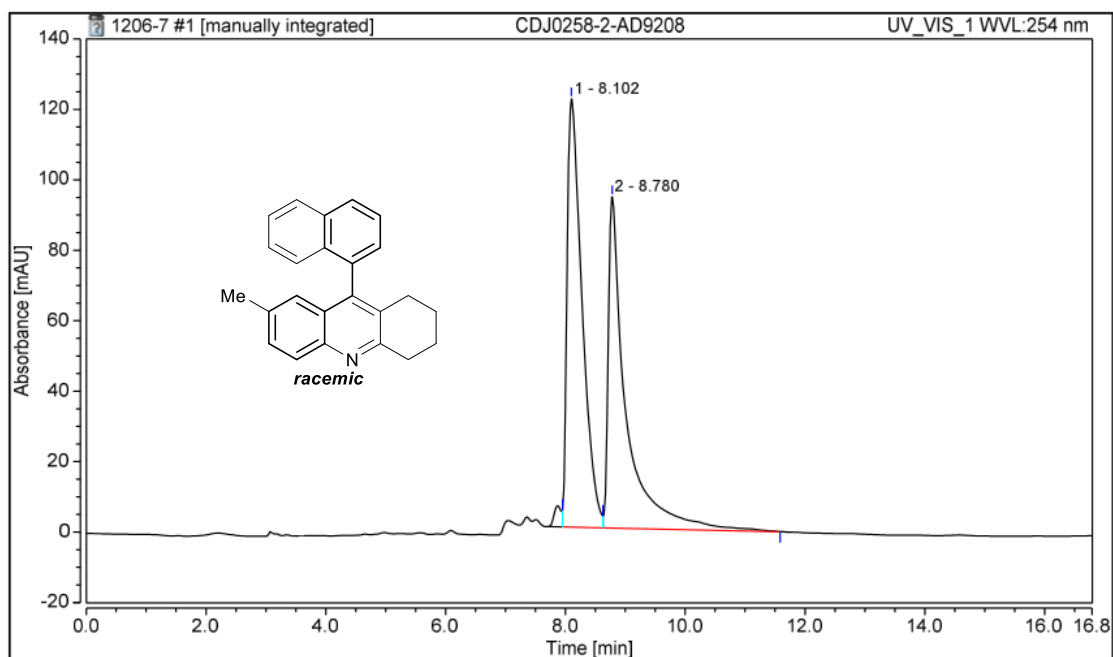

| Integration Results |                       |                 |                |                    |                |                   |
|---------------------|-----------------------|-----------------|----------------|--------------------|----------------|-------------------|
| No.                 | Retention Time<br>min | Area<br>mAU*min | Height<br>mAU  | Relative Area<br>% | Asymmetry (EP) | Peak Width<br>min |
| 1                   | 8.102                 | 35.186          | 121.625        | 52.22              | 2.13           | 0.45              |
| 2                   | 8.780                 | 32.191          | 94.053         | 47.78              | 4.17           | 0.37              |
| <b>Total:</b>       |                       | <b>67.376</b>   | <b>215.678</b> | <b>100.00</b>      |                |                   |

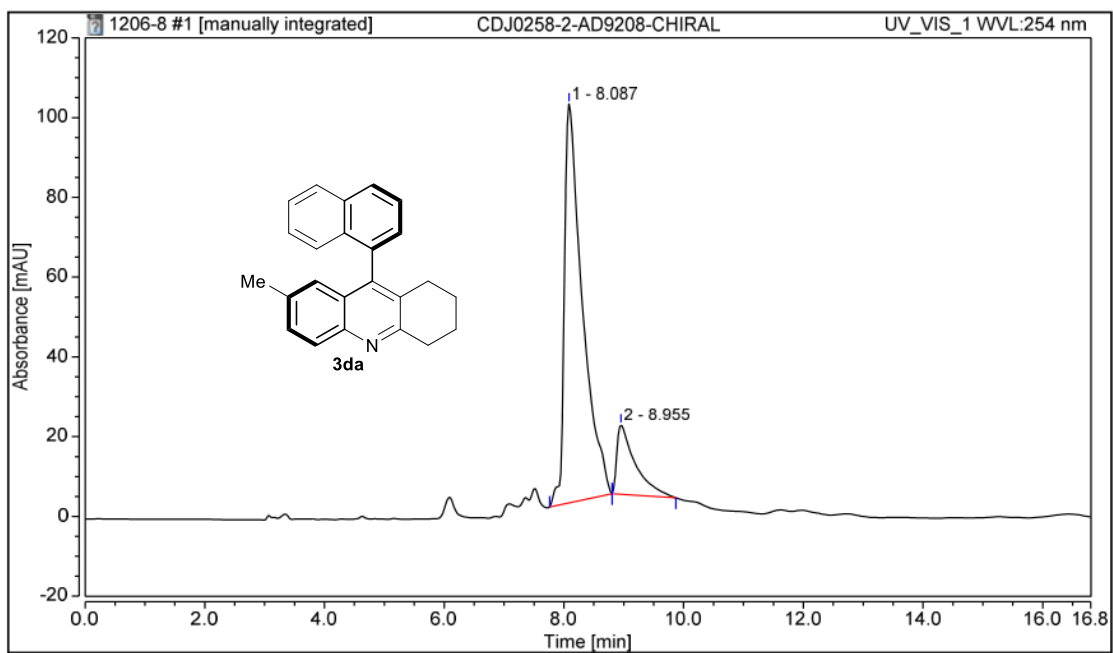

| Integration Results |                       |                 |                |                    |                |                   |
|---------------------|-----------------------|-----------------|----------------|--------------------|----------------|-------------------|
| No.                 | Retention Time<br>min | Area<br>mAU*min | Height<br>mAU  | Relative Area<br>% | Asymmetry (EP) | Peak Width<br>min |
| 1                   | 8.087                 | 34.936          | 100.024        | 84.95              | 2.43           | 0.51              |
| 2                   | 8.955                 | 6.189           | 17.344         | 15.05              | 3.45           | 0.48              |
| <b>Total:</b>       |                       | <b>41.125</b>   | <b>117.368</b> | <b>100.00</b>      |                |                   |

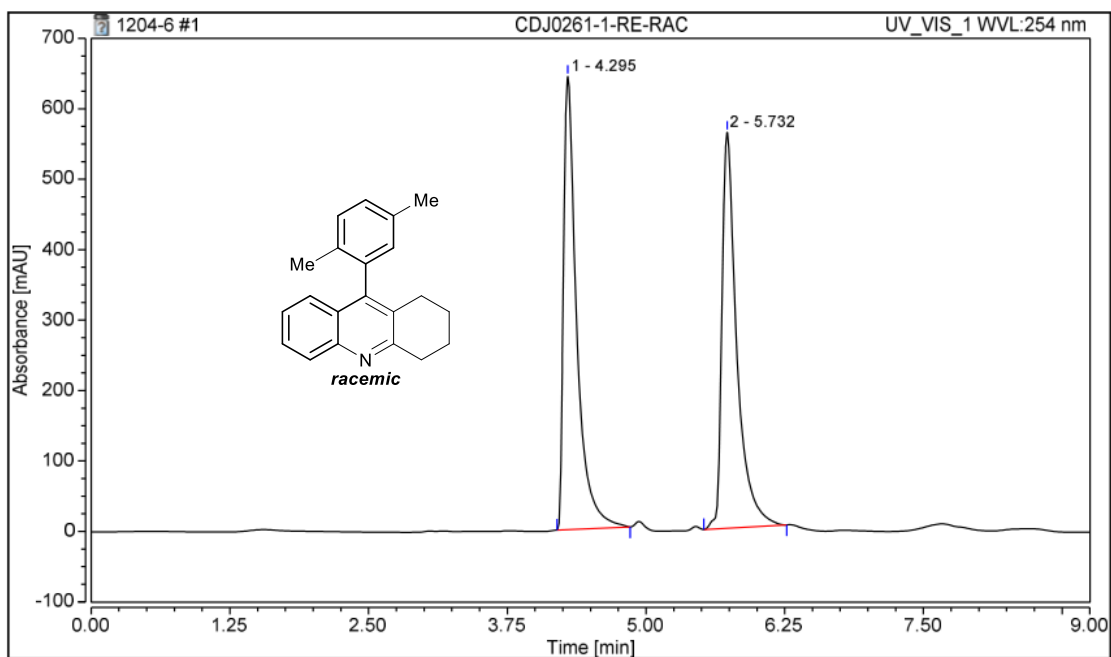

| Integration Results |                       |                 |                 |                    |                |                   |
|---------------------|-----------------------|-----------------|-----------------|--------------------|----------------|-------------------|
| No.                 | Retention Time<br>min | Area<br>mAU*min | Height<br>mAU   | Relative Area<br>% | Asymmetry (EP) | Peak Width<br>min |
| 1                   | 4.295                 | 88.719          | 643.701         | 50.47              | 2.27           | 0.19              |
| 2                   | 5.732                 | 87.073          | 562.053         | 49.53              | 1.97           | 0.22              |
| <b>Total:</b>       |                       | <b>175.791</b>  | <b>1205.754</b> | <b>100.00</b>      |                |                   |

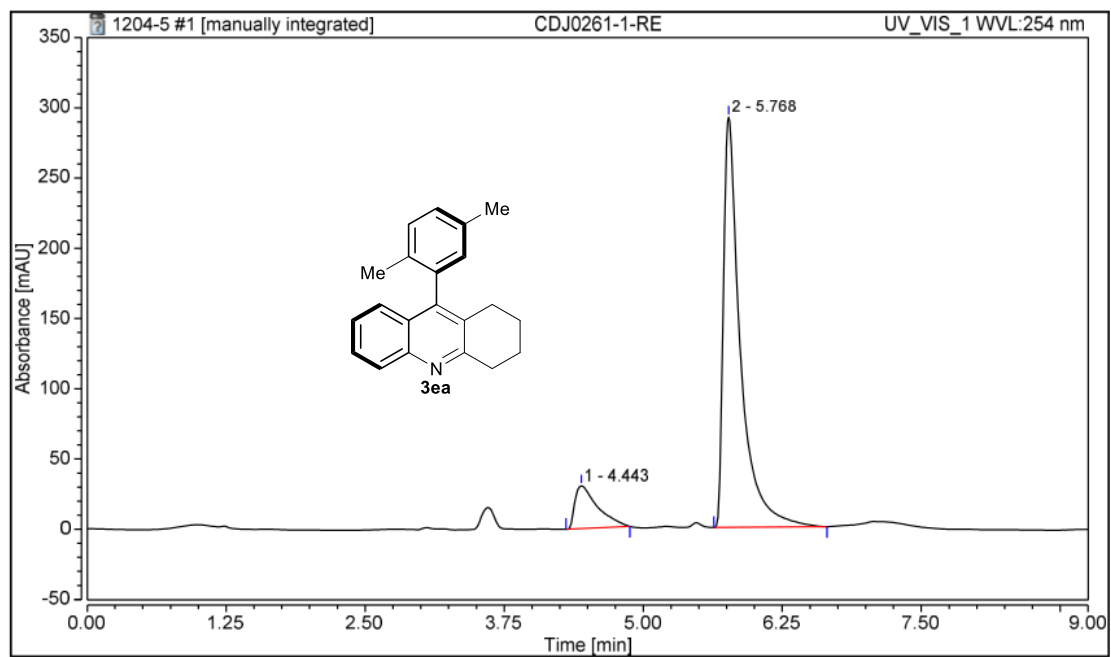

| Integration Results |                       |                 |                |                    |                |                   |
|---------------------|-----------------------|-----------------|----------------|--------------------|----------------|-------------------|
| No.                 | Retention Time<br>min | Area<br>mAU*min | Height<br>mAU  | Relative Area<br>% | Asymmetry (EP) | Peak Width<br>min |
| 1                   | 4.443                 | 7.191           | 30.427         | 12.22              | 2.41           | 0.34              |
| 2                   | 5.768                 | 51.648          | 292.015        | 87.78              | 2.42           | 0.24              |
| <b>Total:</b>       |                       | <b>58.839</b>   | <b>322.442</b> | <b>100.00</b>      |                |                   |

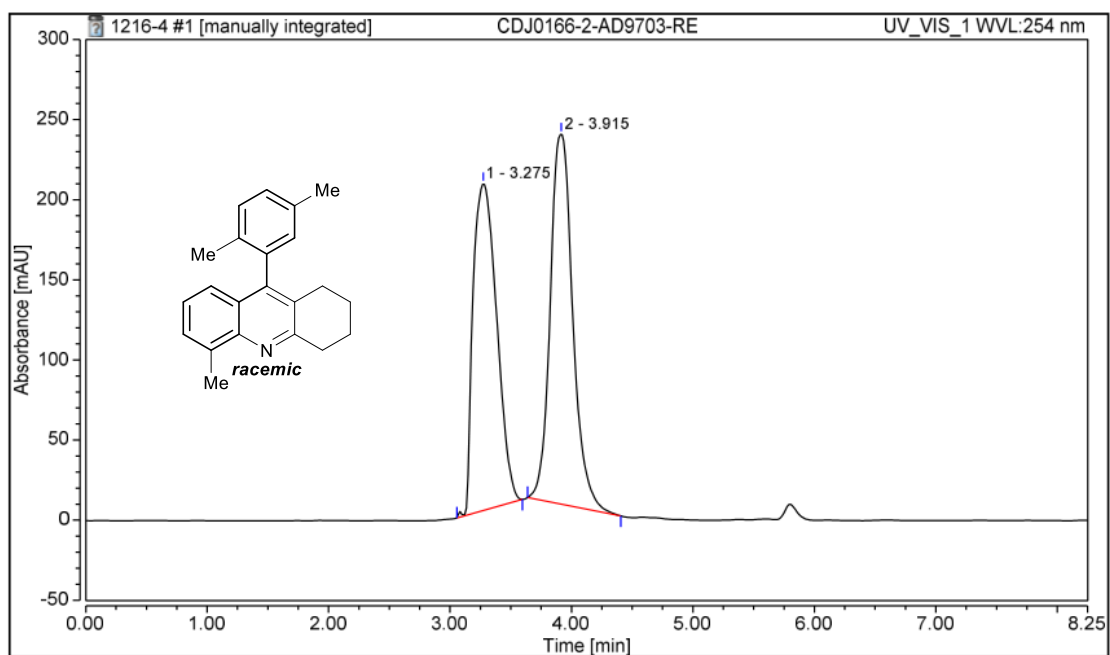

| Integration Results |                       |                 |                |                    |                |                   |
|---------------------|-----------------------|-----------------|----------------|--------------------|----------------|-------------------|
| No.                 | Retention Time<br>min | Area<br>mAU*min | Height<br>mAU  | Relative Area<br>% | Asymmetry (EP) | Peak Width<br>min |
| 1                   | 3.275                 | 45.714          | 203.998        | 47.98              | 1.41           | 0.35              |
| 2                   | 3.915                 | 49.560          | 231.041        | 52.02              | 1.15           | 0.30              |
| <b>Total:</b>       |                       | <b>95.274</b>   | <b>435.039</b> | <b>100.00</b>      |                |                   |

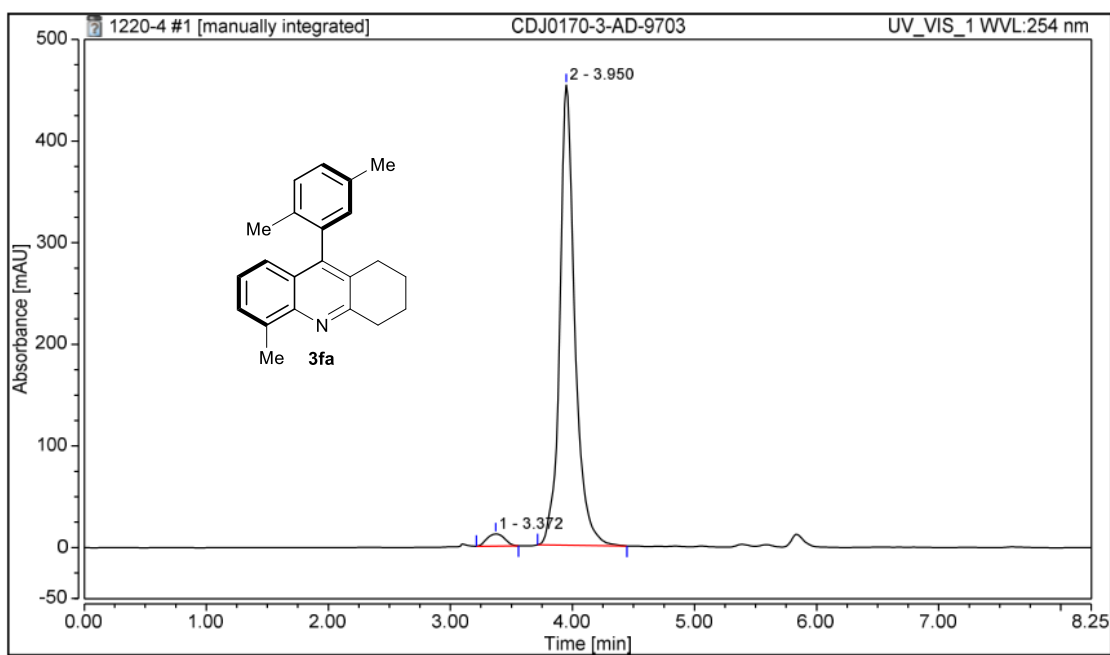

| Integration Results |                       |                 |                |                    |                |                   |
|---------------------|-----------------------|-----------------|----------------|--------------------|----------------|-------------------|
| No.                 | Retention Time<br>min | Area<br>mAU*min | Height<br>mAU  | Relative Area<br>% | Asymmetry (EP) | Peak Width<br>min |
| 1                   | 3.372                 | 1.972           | 11.767         | 2.95               | 1.05           | 0.26              |
| 2                   | 3.950                 | 64.805          | 452.912        | 97.05              | 1.15           | 0.20              |
| <b>Total:</b>       |                       | <b>66.777</b>   | <b>464.679</b> | <b>100.00</b>      |                |                   |



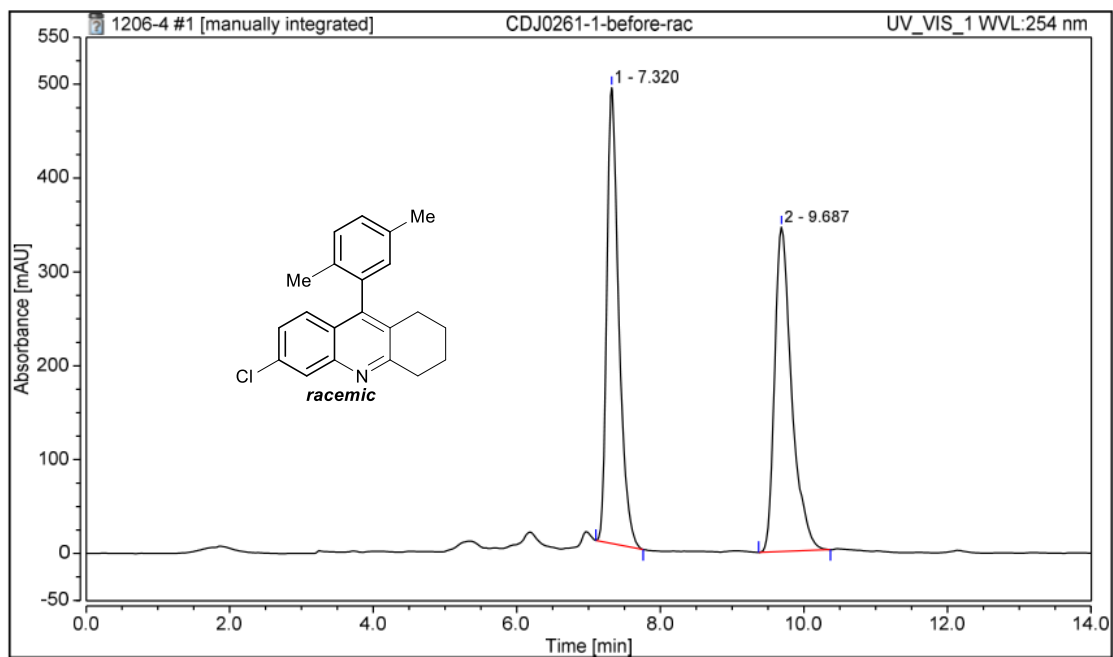

| Integration Results |                    |                |                |                 |                |                |
|---------------------|--------------------|----------------|----------------|-----------------|----------------|----------------|
| No.                 | Retention Time min | Area mAU*min   | Height mAU     | Relative Area % | Asymmetry (EP) | Peak Width min |
| 1                   | 7.320              | 93.921         | 485.959        | 49.60           | 1.46           | 0.29           |
| 2                   | 9.687              | 95.419         | 345.866        | 50.40           | 1.50           | 0.41           |
| <b>Total:</b>       |                    | <b>189.340</b> | <b>831.826</b> | <b>100.00</b>   |                |                |

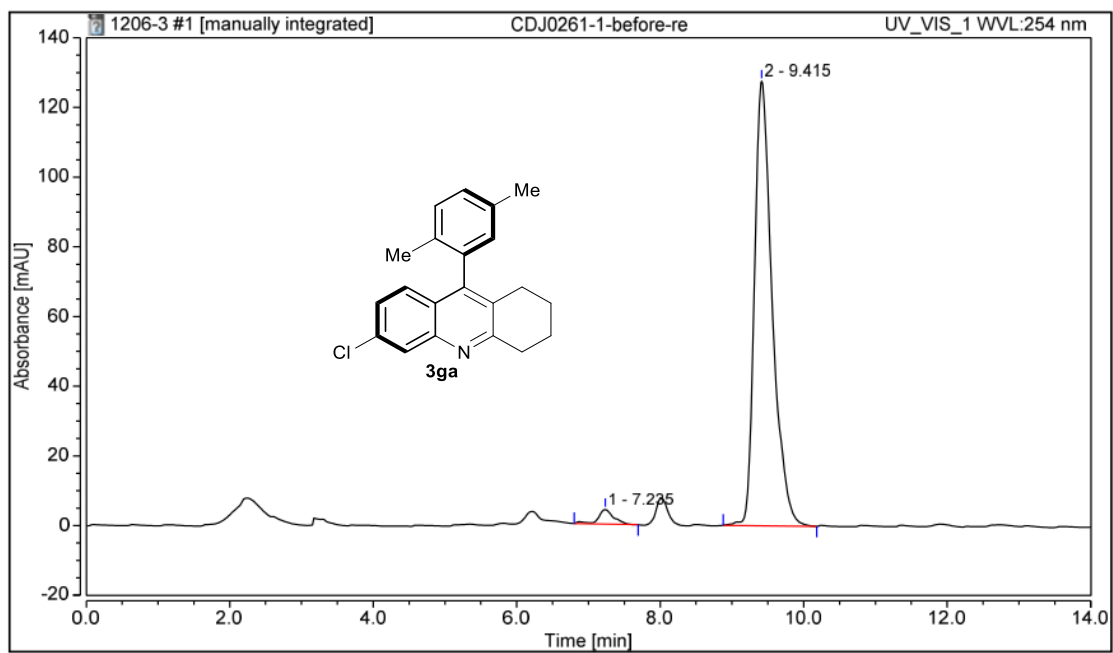

| Integration Results |                    |               |                |                 |                |                |
|---------------------|--------------------|---------------|----------------|-----------------|----------------|----------------|
| No.                 | Retention Time min | Area mAU*min  | Height mAU     | Relative Area % | Asymmetry (EP) | Peak Width min |
| 1                   | 7.235              | 1.045         | 4.189          | 2.77            | 0.87           | 0.32           |
| 2                   | 9.415              | 36.639        | 127.629        | 97.23           | 1.43           | 0.43           |
| <b>Total:</b>       |                    | <b>37.684</b> | <b>131.819</b> | <b>100.00</b>   |                |                |

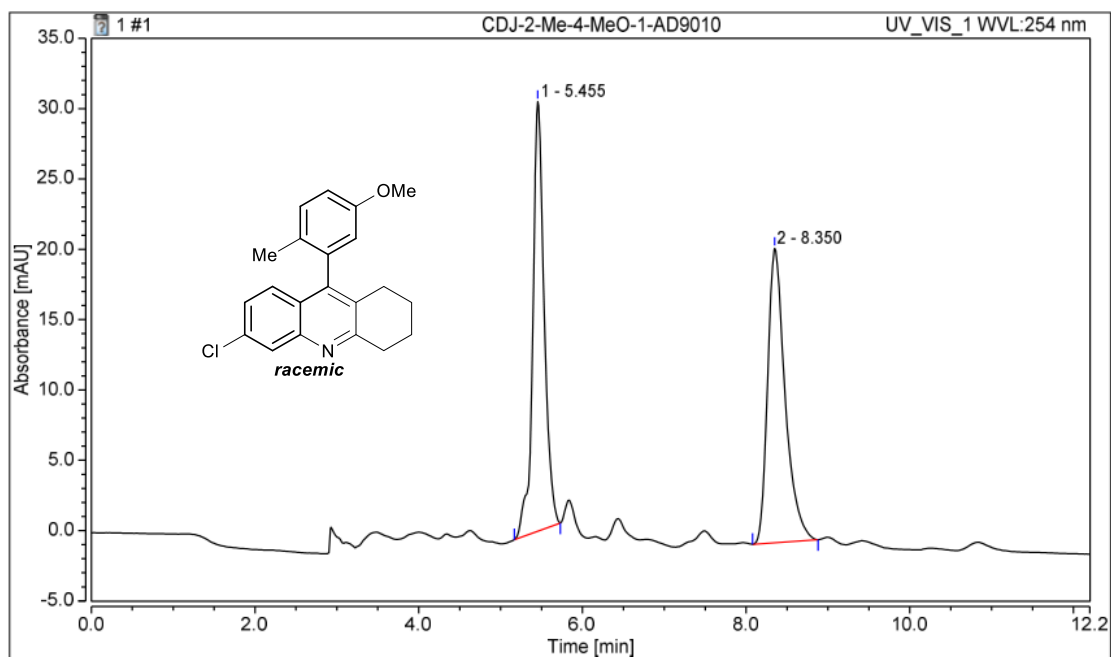

| Integration Results |                       |                 |               |                    |                |                   |
|---------------------|-----------------------|-----------------|---------------|--------------------|----------------|-------------------|
| No.                 | Retention Time<br>min | Area<br>mAU*min | Height<br>mAU | Relative Area<br>% | Asymmetry (EP) | Peak Width<br>min |
| 1                   | 5.455                 | 4.922           | 30.554        | 48.71              | 1.00           | 0.24              |
| 2                   | 8.350                 | 5.184           | 20.929        | 51.29              | 1.46           | 0.37              |
| <b>Total:</b>       |                       | <b>10.106</b>   | <b>51.483</b> | <b>100.00</b>      |                |                   |

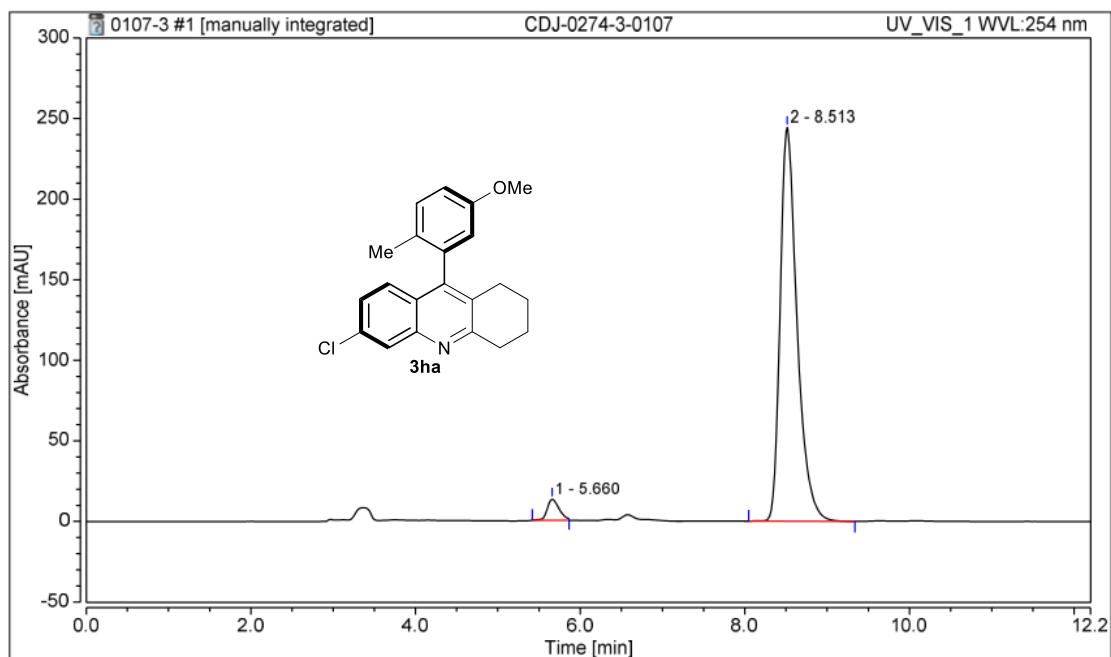

| Integration Results |                       |                 |                |                    |                |                   |
|---------------------|-----------------------|-----------------|----------------|--------------------|----------------|-------------------|
| No.                 | Retention Time<br>min | Area<br>mAU*min | Height<br>mAU  | Relative Area<br>% | Asymmetry (EP) | Peak Width<br>min |
| 1                   | 5.660                 | 2.209           | 13.171         | 3.65               | n.a.           | 0.26              |
| 2                   | 8.513                 | 58.265          | 244.437        | 96.35              | 1.43           | 0.36              |
| <b>Total:</b>       |                       | <b>60.474</b>   | <b>257.608</b> | <b>100.00</b>      |                |                   |

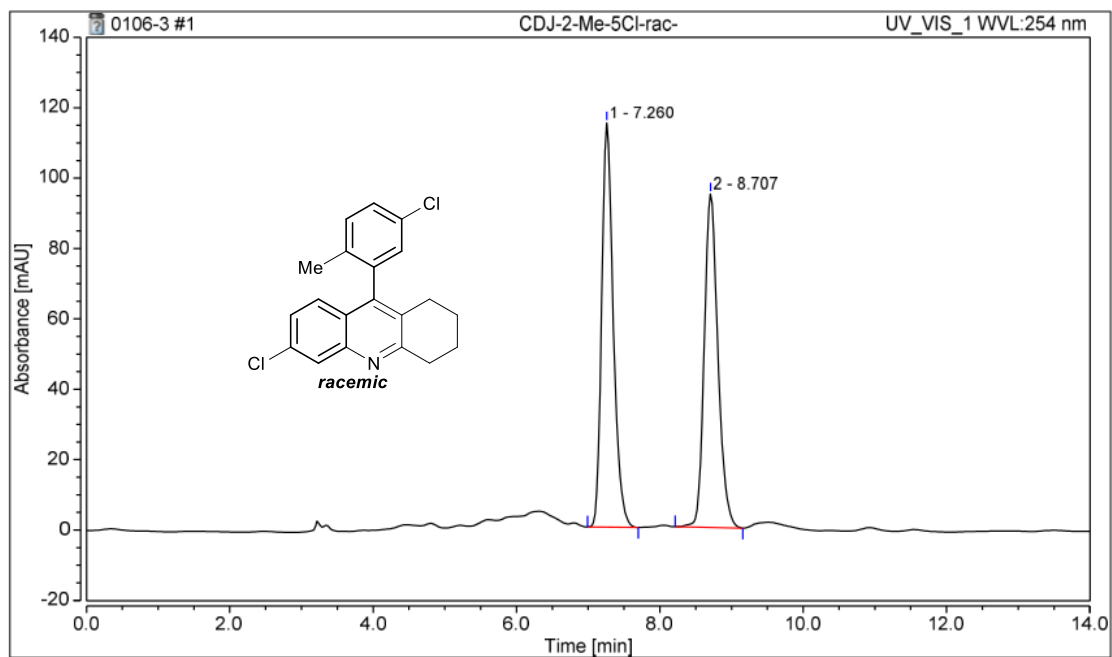

| Integration Results |                       |                 |                |                    |                |                   |
|---------------------|-----------------------|-----------------|----------------|--------------------|----------------|-------------------|
| No.                 | Retention Time<br>min | Area<br>mAU*min | Height<br>mAU  | Relative Area<br>% | Asymmetry (EP) | Peak Width<br>min |
| 1                   | 7.260                 | 21.529          | 114.848        | 50.61              | 1.27           | 0.28              |
| 2                   | 8.707                 | 21.009          | 94.805         | 49.39              | 1.21           | 0.35              |
| <b>Total:</b>       |                       | <b>42.537</b>   | <b>209.652</b> | <b>100.00</b>      |                |                   |

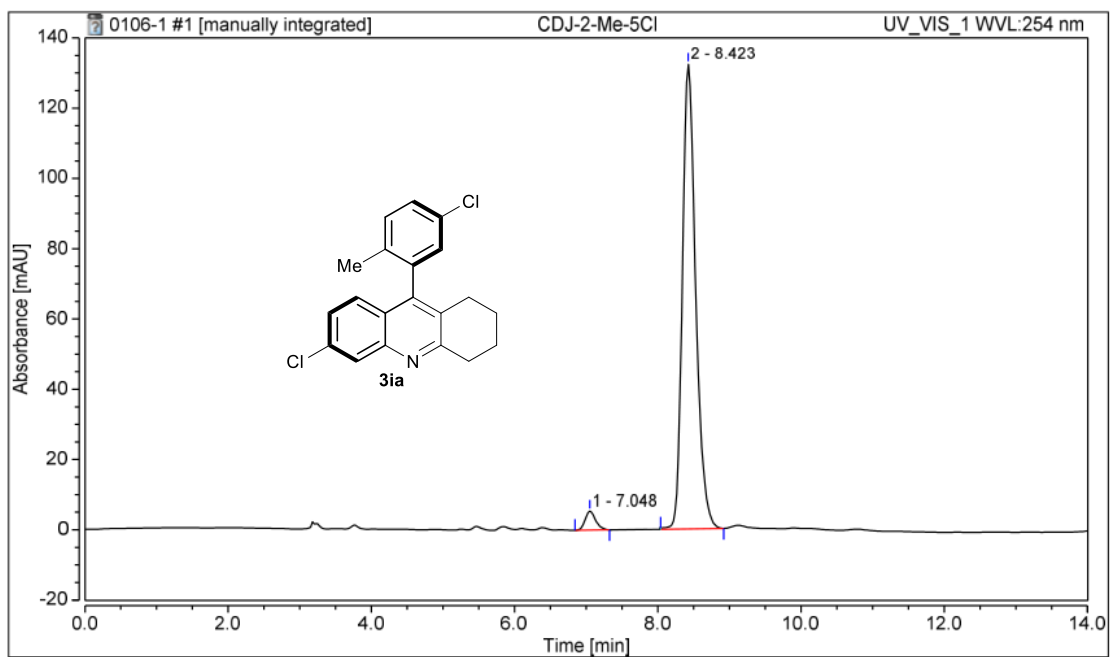

| Integration Results |                       |                 |                |                    |                |                   |
|---------------------|-----------------------|-----------------|----------------|--------------------|----------------|-------------------|
| No.                 | Retention Time<br>min | Area<br>mAU*min | Height<br>mAU  | Relative Area<br>% | Asymmetry (EP) | Peak Width<br>min |
| 1                   | 7.048                 | 0.917           | 5.403          | 3.12               | 1.23           | 0.26              |
| 2                   | 8.423                 | 28.428          | 132.281        | 96.88              | 1.28           | 0.32              |
| <b>Total:</b>       |                       | <b>29.344</b>   | <b>137.683</b> | <b>100.00</b>      |                |                   |

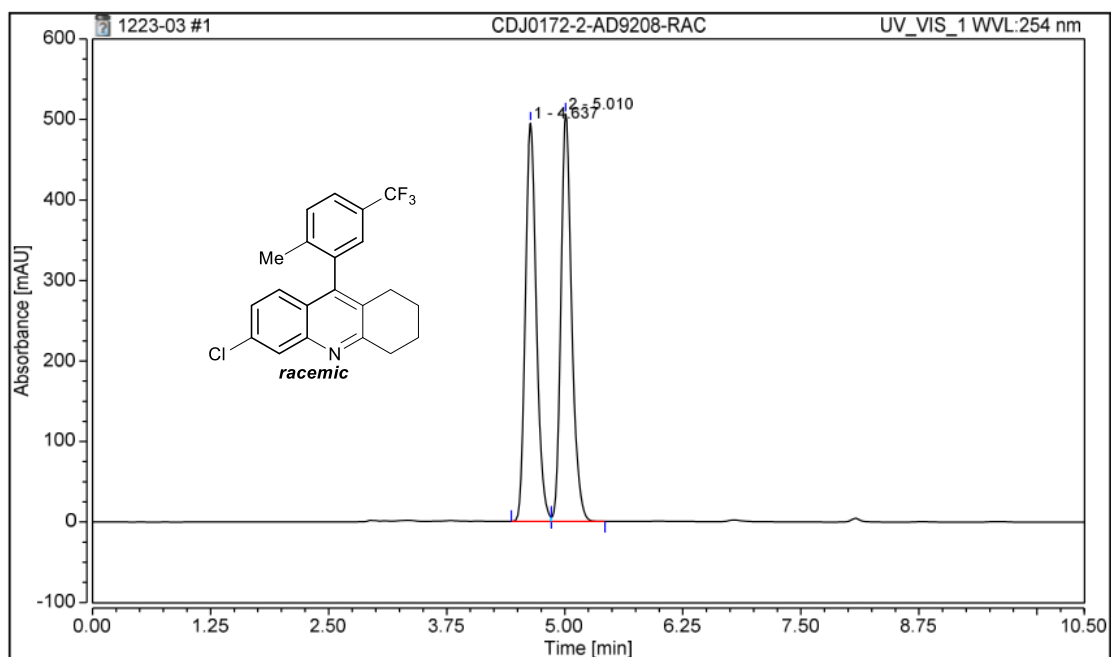

| Integration Results |                       |                 |                 |                    |                |                   |
|---------------------|-----------------------|-----------------|-----------------|--------------------|----------------|-------------------|
| No.                 | Retention Time<br>min | Area<br>mAU*min | Height<br>mAU   | Relative Area<br>% | Asymmetry (EP) | Peak Width<br>min |
| 1                   | 4.637                 | 67.054          | 494.745         | 49.94              | 1.19           | 0.21              |
| 2                   | 5.010                 | 67.225          | 505.984         | 50.06              | 1.25           | 0.20              |
| <b>Total:</b>       |                       | <b>134.279</b>  | <b>1000.729</b> | <b>100.00</b>      |                |                   |

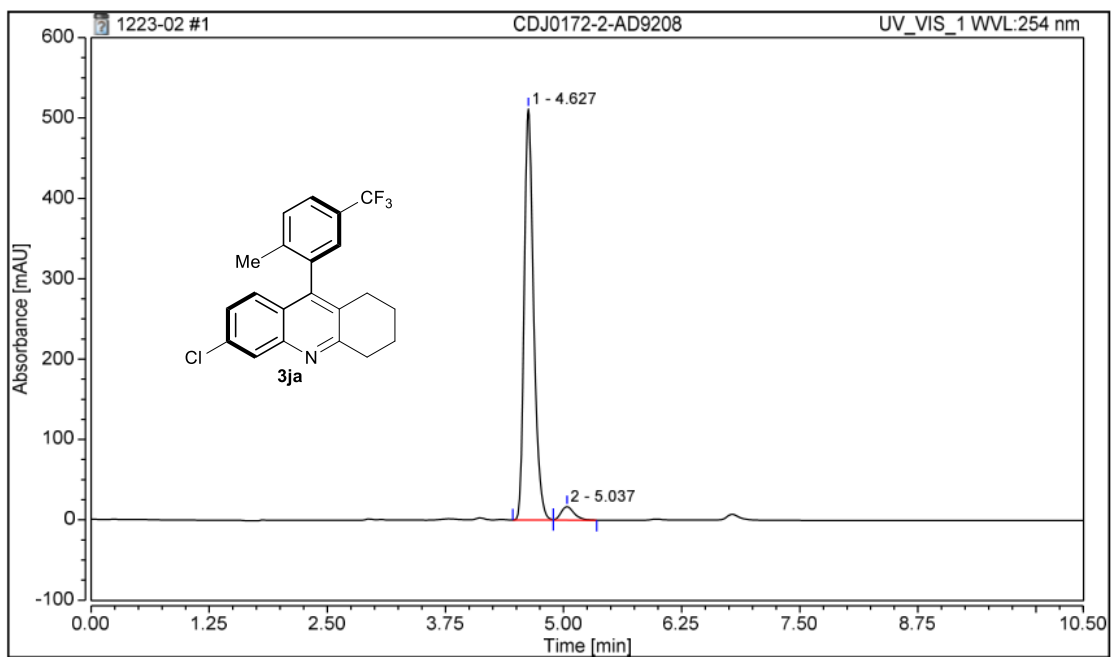

| Integration Results |                       |                 |                |                    |                |                   |
|---------------------|-----------------------|-----------------|----------------|--------------------|----------------|-------------------|
| No.                 | Retention Time<br>min | Area<br>mAU*min | Height<br>mAU  | Relative Area<br>% | Asymmetry (EP) | Peak Width<br>min |
| 1                   | 4.627                 | 58.631          | 511.665        | 95.58              | 1.32           | 0.18              |
| 2                   | 5.037                 | 2.714           | 16.719         | 4.42               | 1.27           | 0.25              |
| <b>Total:</b>       |                       | <b>61.346</b>   | <b>528.384</b> | <b>100.00</b>      |                |                   |

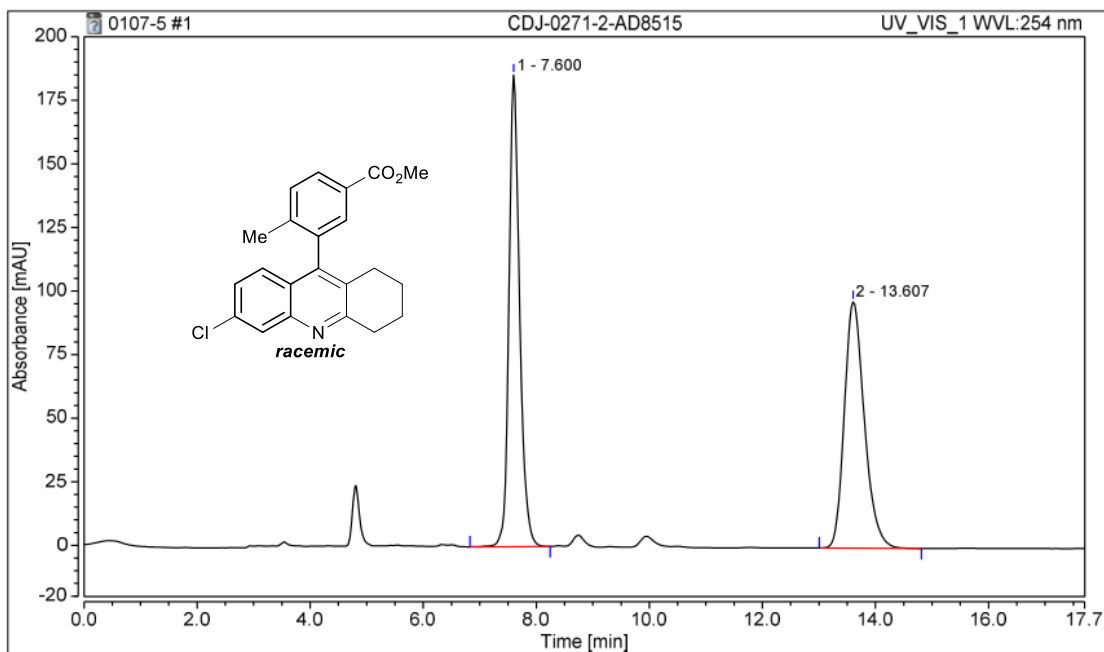

| Integration Results |                    |               |                |                 |                |                |
|---------------------|--------------------|---------------|----------------|-----------------|----------------|----------------|
| No.                 | Retention Time min | Area mAU*min  | Height mAU     | Relative Area % | Asymmetry (EP) | Peak Width min |
| 1                   | 7.600              | 40.320        | 185.495        | 50.34           | 1.22           | 0.33           |
| 2                   | 13.607             | 39.783        | 96.897         | 49.66           | 1.25           | 0.63           |
| <b>Total:</b>       |                    | <b>80.103</b> | <b>282.393</b> | <b>100.00</b>   |                |                |

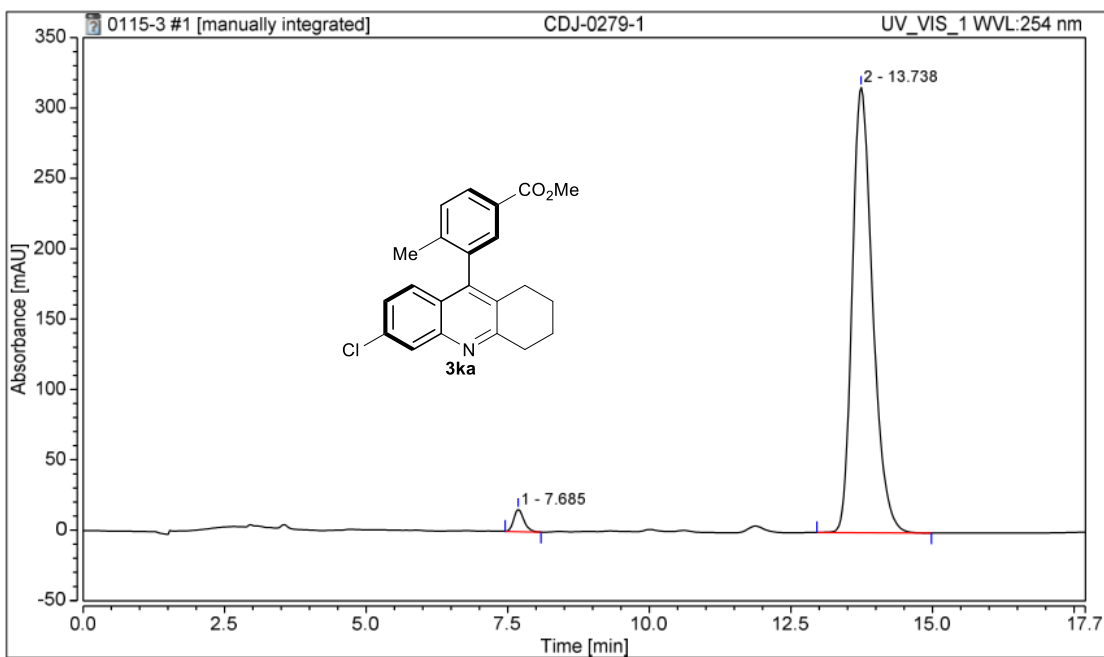

| Integration Results |                    |                |                |                 |                |                |
|---------------------|--------------------|----------------|----------------|-----------------|----------------|----------------|
| No.                 | Retention Time min | Area mAU*min   | Height mAU     | Relative Area % | Asymmetry (EP) | Peak Width min |
| 1                   | 7.685              | 3.255          | 15.742         | 2.40            | 1.26           | 0.33           |
| 2                   | 13.738             | 132.278        | 316.524        | 97.60           | 1.29           | 0.65           |
| <b>Total:</b>       |                    | <b>135.533</b> | <b>332.266</b> | <b>100.00</b>   |                |                |

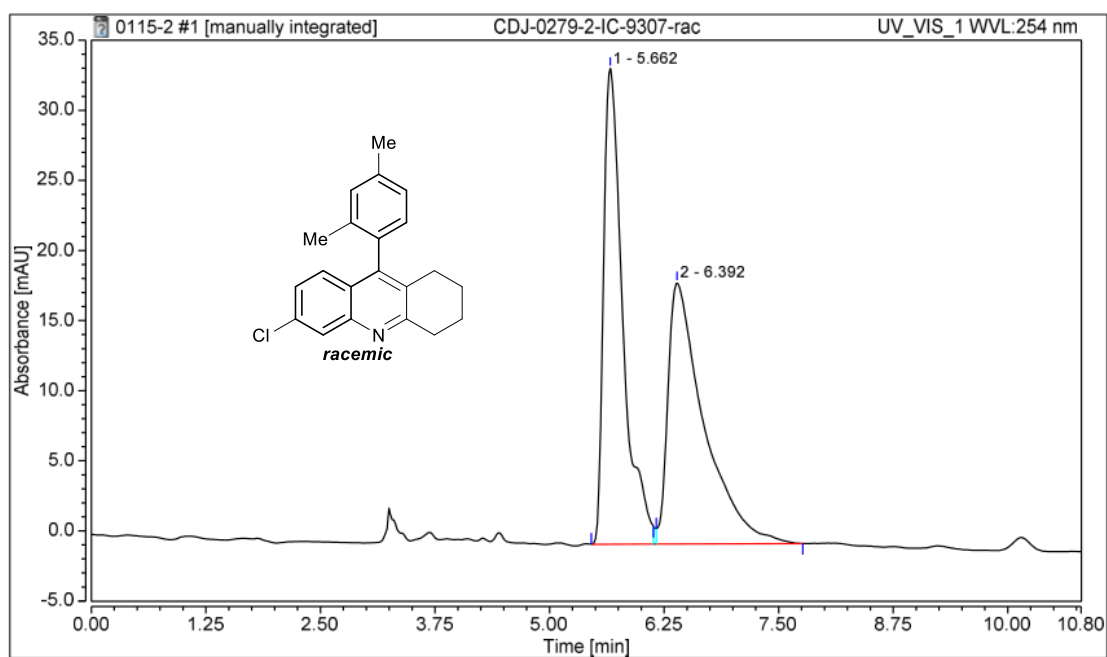

| Integration Results |                    |               |               |                 |                |                |
|---------------------|--------------------|---------------|---------------|-----------------|----------------|----------------|
| No.                 | Retention Time min | Area mAU*min  | Height mAU    | Relative Area % | Asymmetry (EP) | Peak Width min |
| 1                   | 5.662              | 8.268         | 33.929        | 49.46           | 2.07           | 0.35           |
| 2                   | 6.392              | 8.447         | 18.631        | 50.54           | n.a.           | 0.63           |
| <b>Total:</b>       |                    | <b>16.715</b> | <b>52.560</b> | <b>100.00</b>   |                |                |

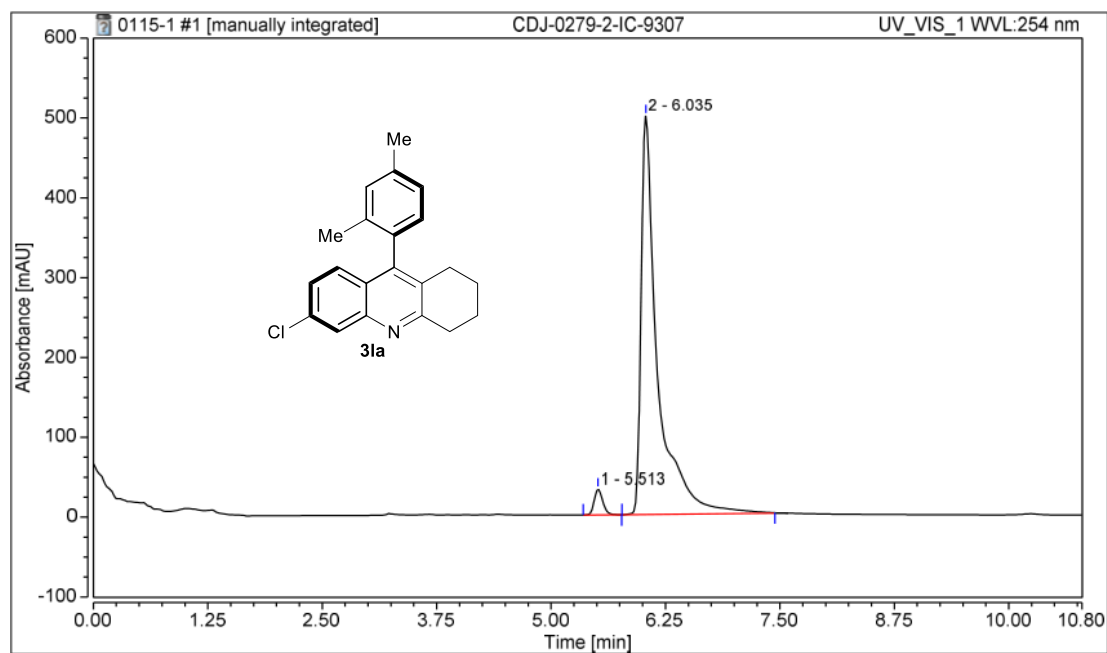

| Integration Results |                    |                |                |                 |                |                |
|---------------------|--------------------|----------------|----------------|-----------------|----------------|----------------|
| No.                 | Retention Time min | Area mAU*min   | Height mAU     | Relative Area % | Asymmetry (EP) | Peak Width min |
| 1                   | 5.513              | 3.451          | 32.121         | 3.19            | 1.21           | 0.17           |
| 2                   | 6.035              | 104.768        | 499.225        | 96.81           | 2.88           | 0.25           |
| <b>Total:</b>       |                    | <b>108.220</b> | <b>531.346</b> | <b>100.00</b>   |                |                |

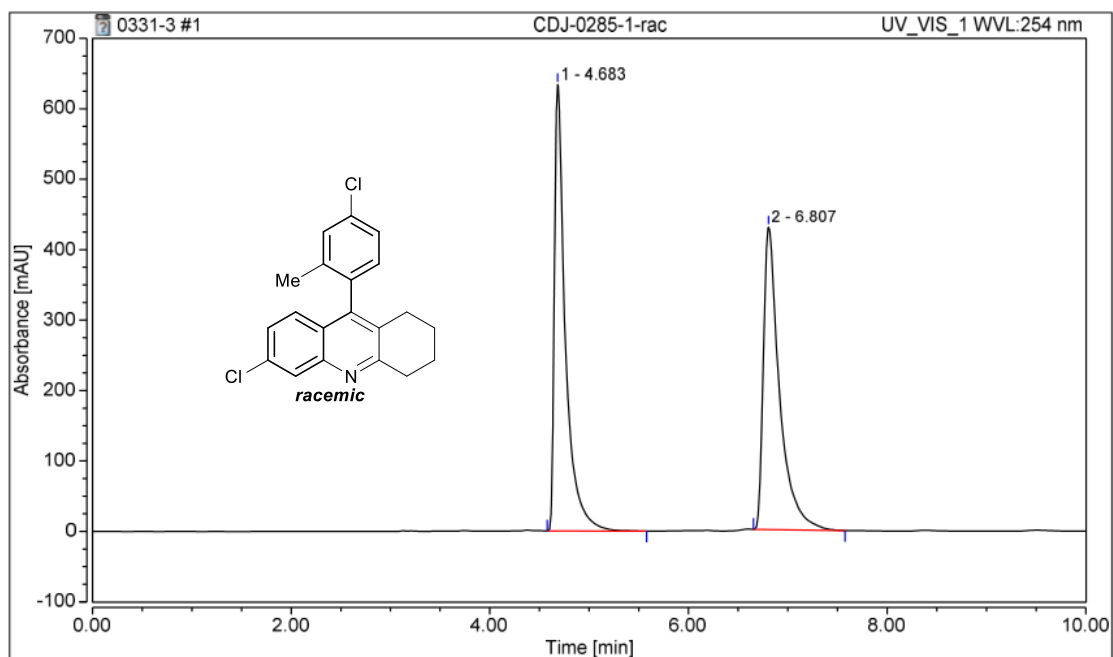

| Integration Results |                       |                 |                 |                    |                |                   |
|---------------------|-----------------------|-----------------|-----------------|--------------------|----------------|-------------------|
| No.                 | Retention Time<br>min | Area<br>mAU*min | Height<br>mAU   | Relative Area<br>% | Asymmetry (EP) | Peak Width<br>min |
| 1                   | 4.683                 | 81.016          | 633.637         | 50.06              | 2.47           | 0.17              |
| 2                   | 6.807                 | 80.834          | 429.489         | 49.94              | 2.14           | 0.26              |
| <b>Total:</b>       |                       | <b>161.849</b>  | <b>1063.126</b> | <b>100.00</b>      |                |                   |

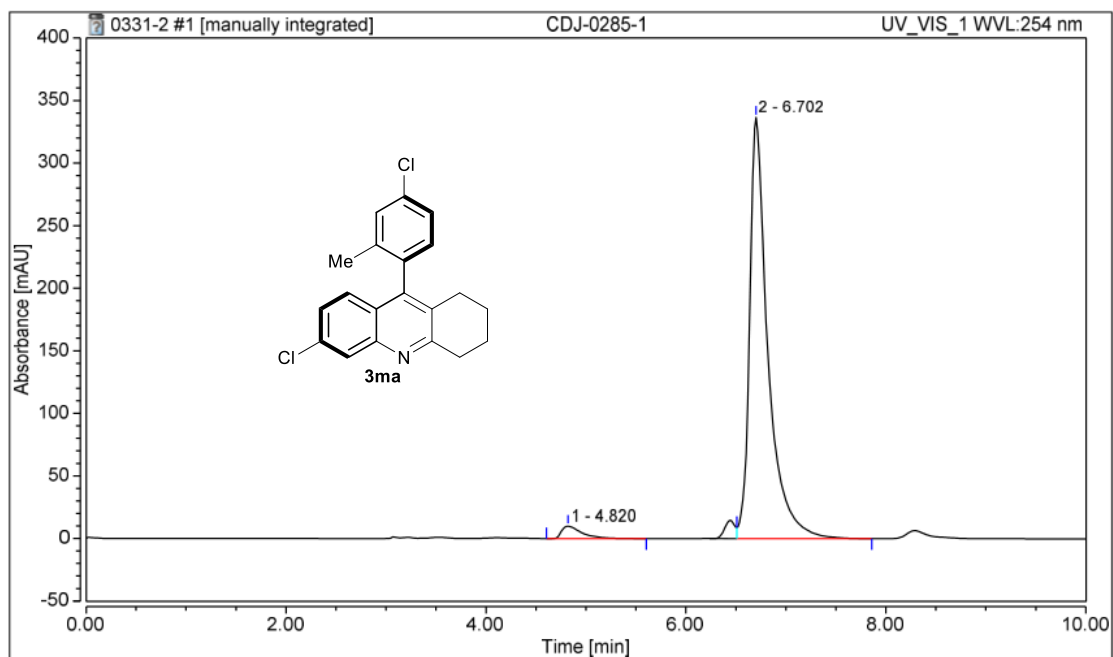

| Integration Results |                       |                 |                |                    |                |                   |
|---------------------|-----------------------|-----------------|----------------|--------------------|----------------|-------------------|
| No.                 | Retention Time<br>min | Area<br>mAU*min | Height<br>mAU  | Relative Area<br>% | Asymmetry (EP) | Peak Width<br>min |
| 1                   | 4.820                 | 2.365           | 9.936          | 3.20               | 2.24           | 0.33              |
| 2                   | 6.702                 | 71.474          | 336.617        | 96.80              | 1.71           | 0.29              |
| <b>Total:</b>       |                       | <b>73.839</b>   | <b>346.552</b> | <b>100.00</b>      |                |                   |

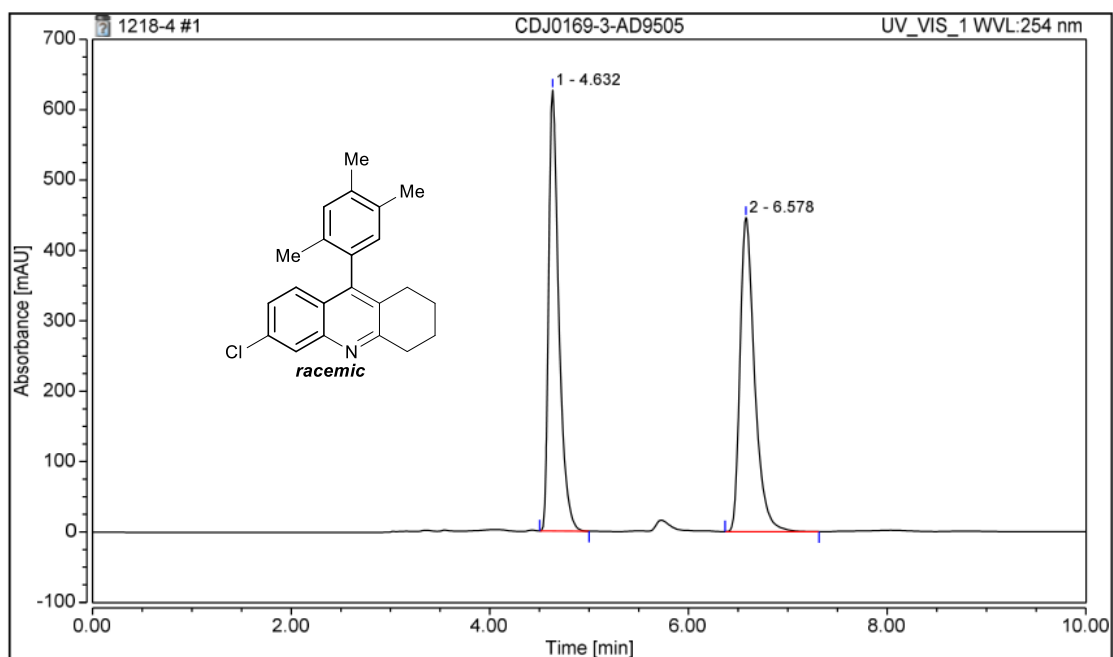

| Integration Results |                       |                 |                 |                    |                |                   |
|---------------------|-----------------------|-----------------|-----------------|--------------------|----------------|-------------------|
| No.                 | Retention Time<br>min | Area<br>mAU*min | Height<br>mAU   | Relative Area<br>% | Asymmetry (EP) | Peak Width<br>min |
| 1                   | 4.632                 | 74.335          | 626.715         | 49.46              | 1.59           | 0.18              |
| 2                   | 6.578                 | 75.968          | 446.470         | 50.54              | 1.46           | 0.26              |
| <b>Total:</b>       |                       | <b>150.303</b>  | <b>1073.184</b> | <b>100.00</b>      |                |                   |

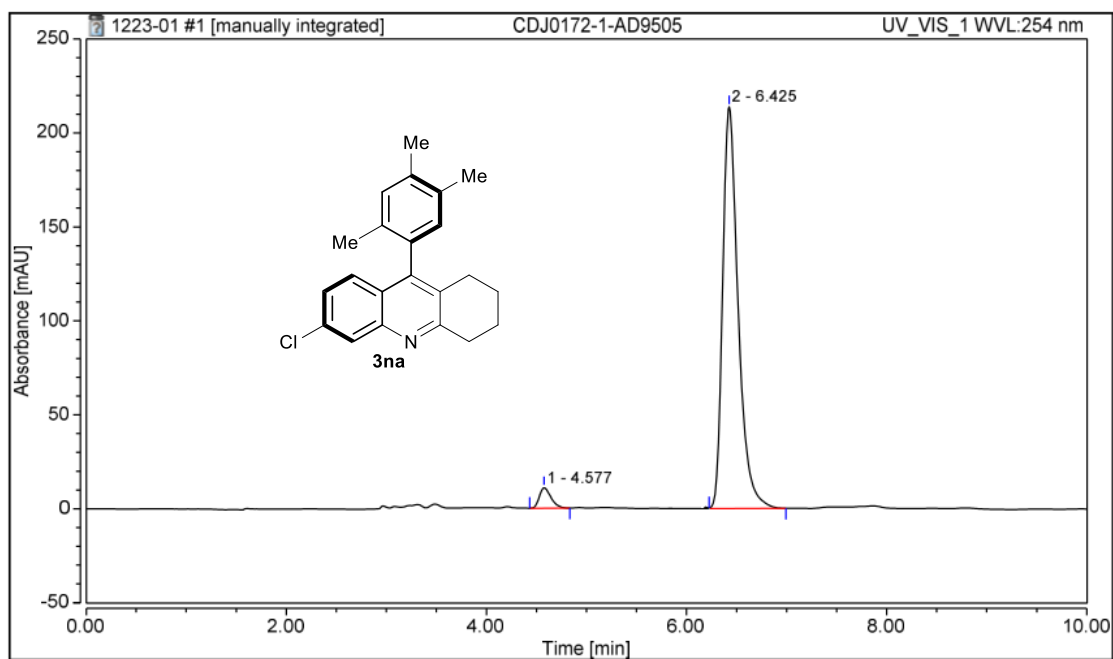

| Integration Results |                       |                 |                |                    |                |                   |
|---------------------|-----------------------|-----------------|----------------|--------------------|----------------|-------------------|
| No.                 | Retention Time<br>min | Area<br>mAU*min | Height<br>mAU  | Relative Area<br>% | Asymmetry (EP) | Peak Width<br>min |
| 1                   | 4.577                 | 1.458           | 10.870         | 3.67               | 1.36           | 0.21              |
| 2                   | 6.425                 | 38.250          | 213.767        | 96.33              | 1.43           | 0.27              |
| <b>Total:</b>       |                       | <b>39.709</b>   | <b>224.637</b> | <b>100.00</b>      |                |                   |



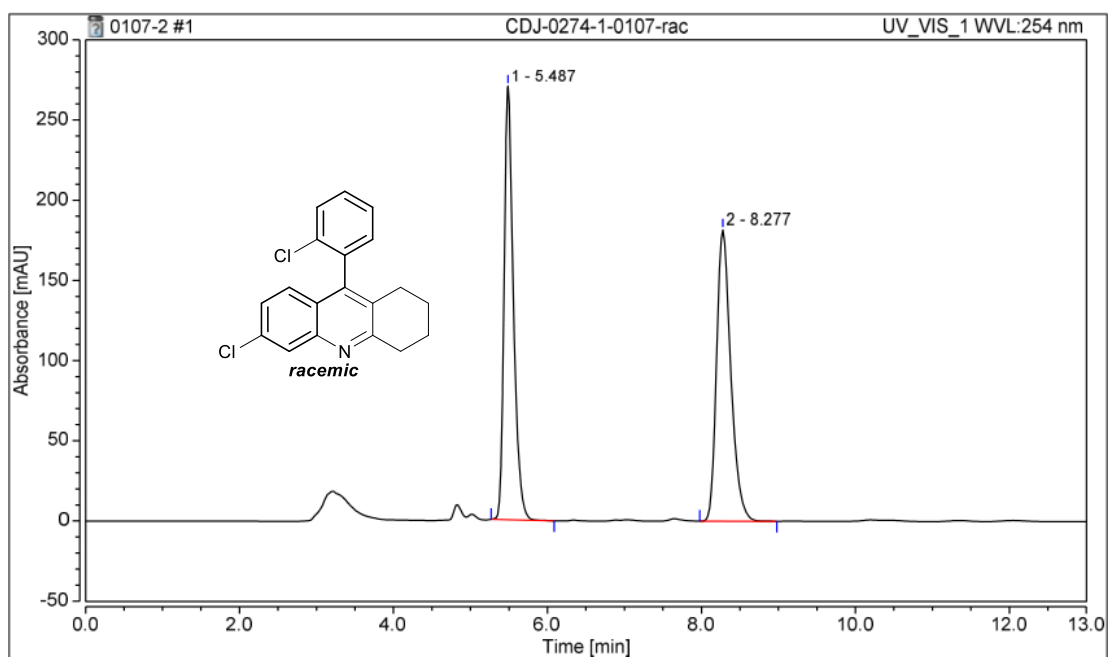

| Integration Results |                       |                 |                |                    |                |                   |
|---------------------|-----------------------|-----------------|----------------|--------------------|----------------|-------------------|
| No.                 | Retention Time<br>min | Area<br>mAU*min | Height<br>mAU  | Relative Area<br>% | Asymmetry (EP) | Peak Width<br>min |
| 1                   | 5.487                 | 37.944          | 270.432        | 49.40              | 1.38           | 0.21              |
| 2                   | 8.277                 | 38.867          | 181.674        | 50.60              | 1.32           | 0.33              |
| <b>Total:</b>       |                       | <b>76.810</b>   | <b>452.106</b> | <b>100.00</b>      |                |                   |

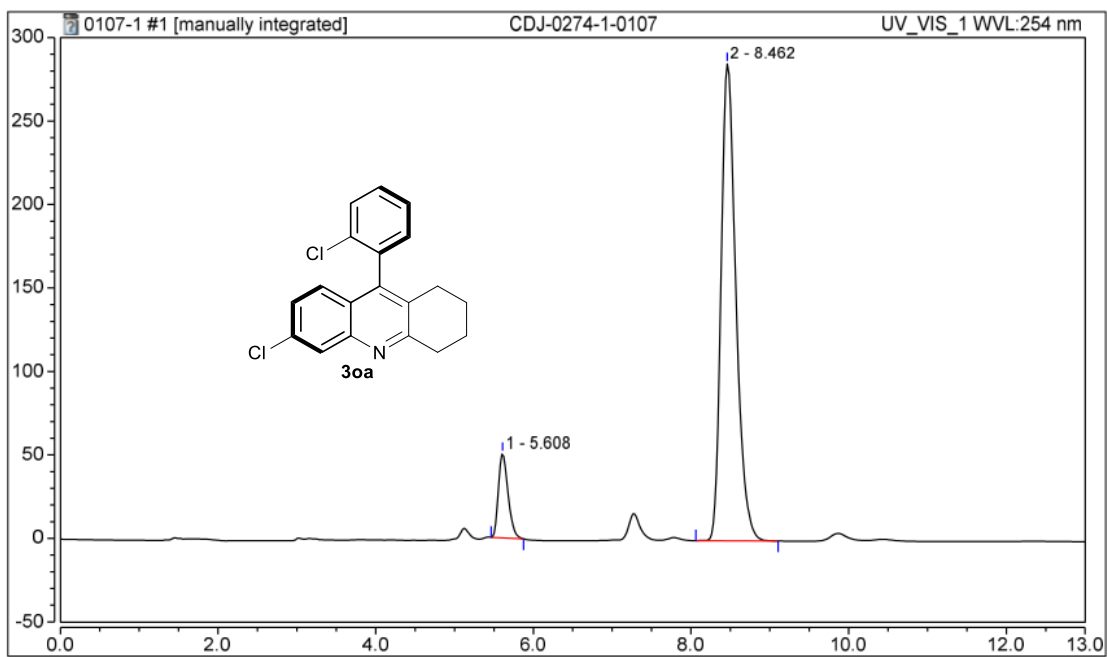

| Integration Results |                       |                 |                |                    |                |                   |
|---------------------|-----------------------|-----------------|----------------|--------------------|----------------|-------------------|
| No.                 | Retention Time<br>min | Area<br>mAU*min | Height<br>mAU  | Relative Area<br>% | Asymmetry (EP) | Peak Width<br>min |
| 1                   | 5.608                 | 7.093           | 50.527         | 10.24              | 1.33           | 0.22              |
| 2                   | 8.462                 | 62.173          | 285.716        | 89.76              | 1.32           | 0.34              |
| <b>Total:</b>       |                       | <b>69.266</b>   | <b>336.244</b> | <b>100.00</b>      |                |                   |

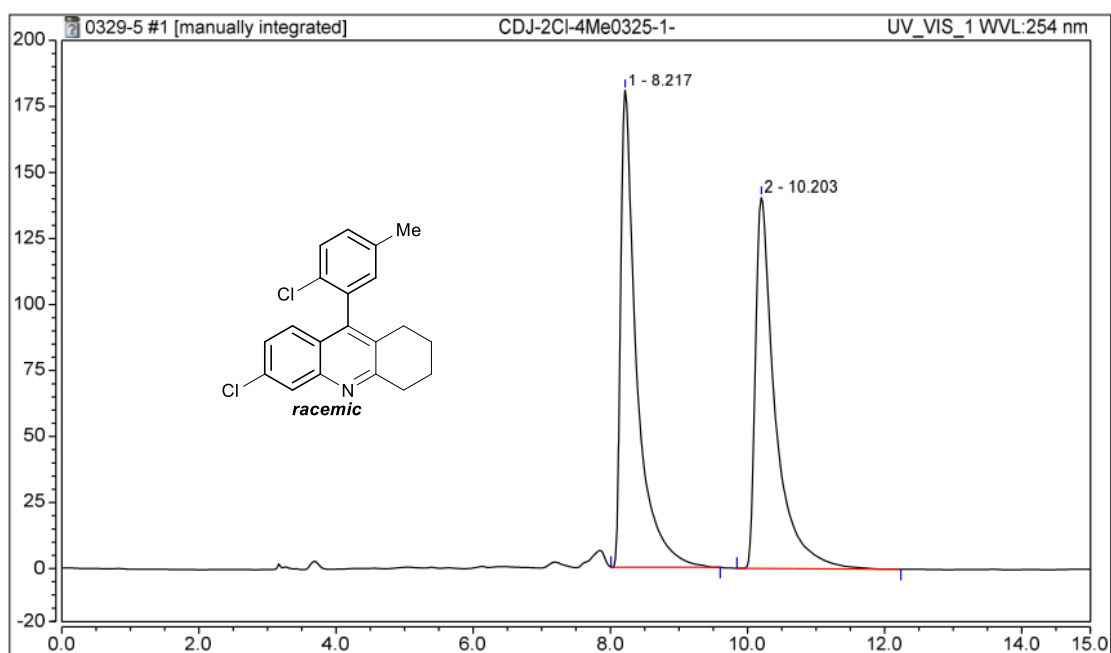

| Integration Results |                       |                 |                |                    |                |                   |
|---------------------|-----------------------|-----------------|----------------|--------------------|----------------|-------------------|
| No.                 | Retention Time<br>min | Area<br>mAU*min | Height<br>mAU  | Relative Area<br>% | Asymmetry (EP) | Peak Width<br>min |
| 1                   | 8.217                 | 48.834          | 180.556        | 50.96              | 2.81           | 0.35              |
| 2                   | 10.203                | 46.991          | 140.620        | 49.04              | 2.50           | 0.46              |
| <b>Total:</b>       |                       | <b>95.825</b>   | <b>321.176</b> | <b>100.00</b>      |                |                   |

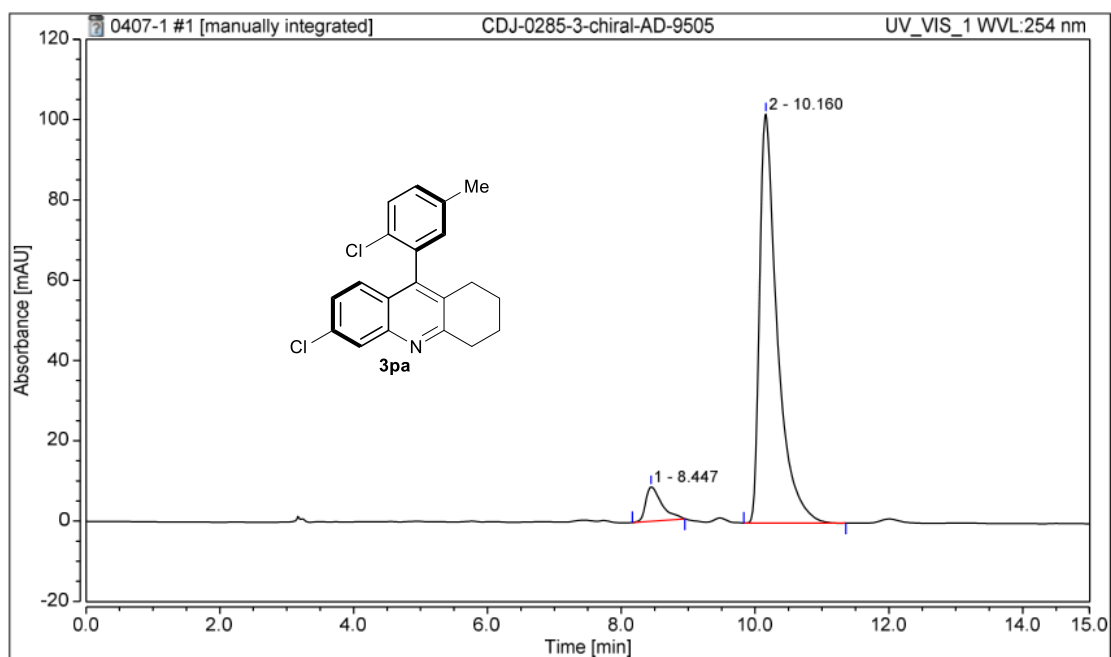

| Integration Results |                       |                 |                |                    |                |                   |
|---------------------|-----------------------|-----------------|----------------|--------------------|----------------|-------------------|
| No.                 | Retention Time<br>min | Area<br>mAU*min | Height<br>mAU  | Relative Area<br>% | Asymmetry (EP) | Peak Width<br>min |
| 1                   | 8.447                 | 2.391           | 8.554          | 7.14               | 1.79           | 0.41              |
| 2                   | 10.160                | 31.074          | 101.889        | 92.86              | 1.98           | 0.43              |
| <b>Total:</b>       |                       | <b>33.465</b>   | <b>110.443</b> | <b>100.00</b>      |                |                   |

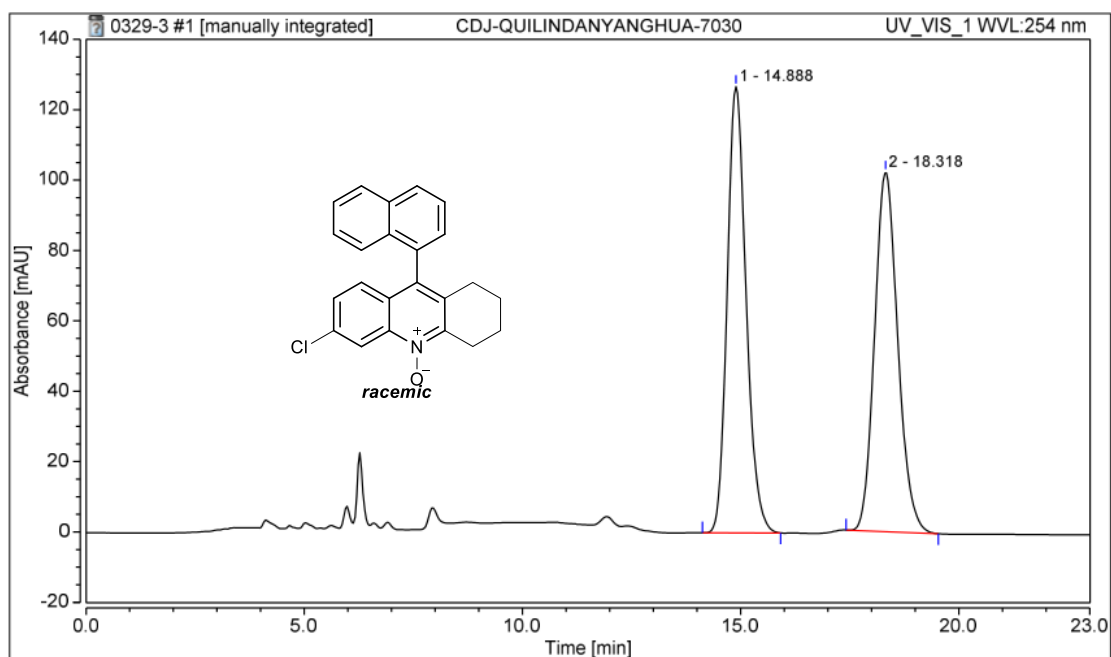

| Integration Results |                       |                 |                |                    |                |                   |
|---------------------|-----------------------|-----------------|----------------|--------------------|----------------|-------------------|
| No.                 | Retention Time<br>min | Area<br>mAU*min | Height<br>mAU  | Relative Area<br>% | Asymmetry (EP) | Peak Width<br>min |
| 1                   | 14.888                | 63.720          | 126.870        | 50.33              | 1.19           | 0.78              |
| 2                   | 18.318                | 62.878          | 102.223        | 49.67              | 1.15           | 0.98              |
| <b>Total:</b>       |                       | <b>126.597</b>  | <b>229.093</b> | <b>100.00</b>      |                |                   |

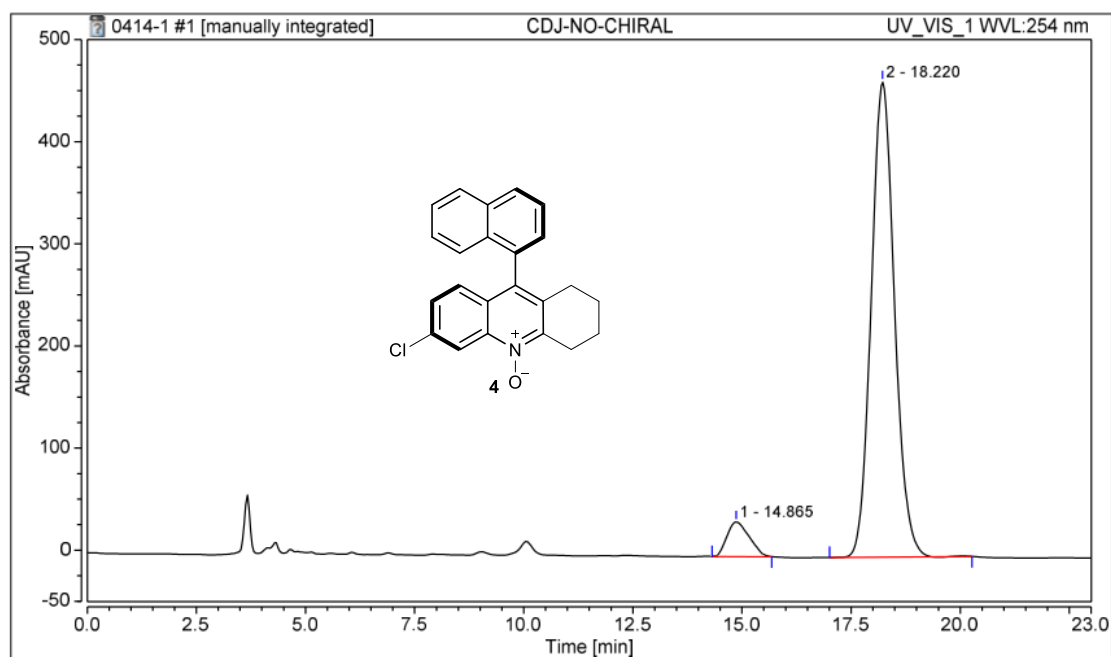

| Integration Results |                       |                 |                |                    |                |                   |
|---------------------|-----------------------|-----------------|----------------|--------------------|----------------|-------------------|
| No.                 | Retention Time<br>min | Area<br>mAU*min | Height<br>mAU  | Relative Area<br>% | Asymmetry (EP) | Peak Width<br>min |
| 1                   | 14.865                | 20.545          | 34.391         | 6.68               | 1.27           | 1.02              |
| 2                   | 18.220                | 286.874         | 465.264        | 93.32              | 1.10           | 0.97              |
| <b>Total:</b>       |                       | <b>307.419</b>  | <b>499.656</b> | <b>100.00</b>      |                |                   |

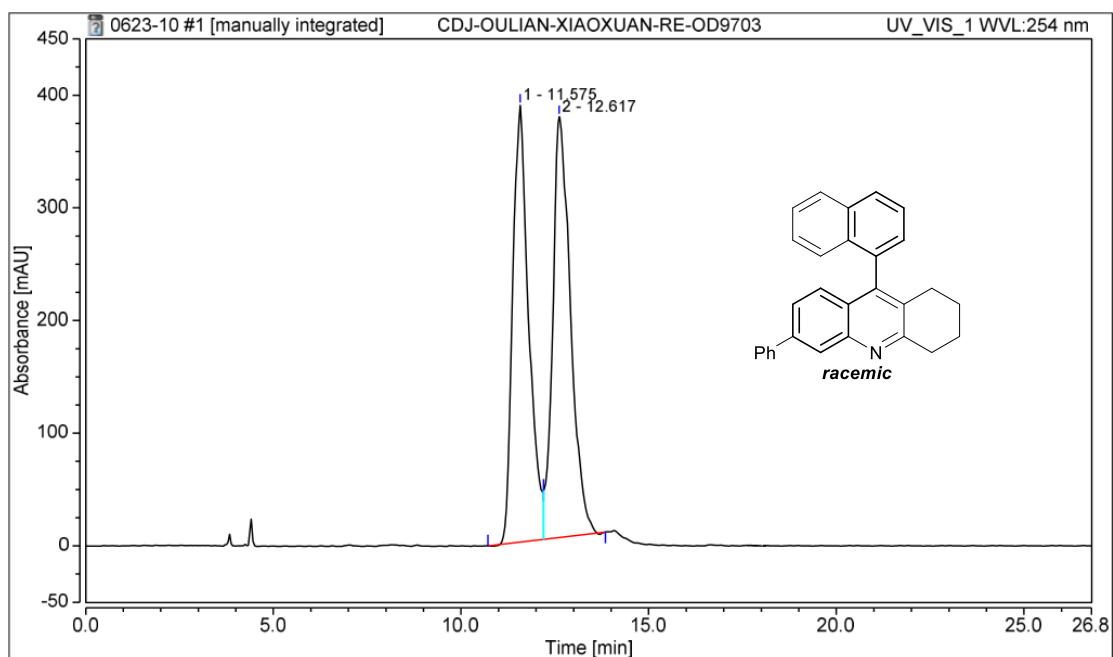

| Integration Results |                       |                 |                |                    |                |                   |
|---------------------|-----------------------|-----------------|----------------|--------------------|----------------|-------------------|
| No.                 | Retention Time<br>min | Area<br>mAU*min | Height<br>mAU  | Relative Area<br>% | Asymmetry (EP) | Peak Width<br>min |
| 1                   | 11.575                | 191.004         | 387.659        | 48.17              | n.a.           | 0.99              |
| 2                   | 12.617                | 205.530         | 373.531        | 51.83              | n.a.           | 0.87              |
| <b>Total:</b>       |                       | <b>396.534</b>  | <b>761.190</b> | <b>100.00</b>      |                |                   |

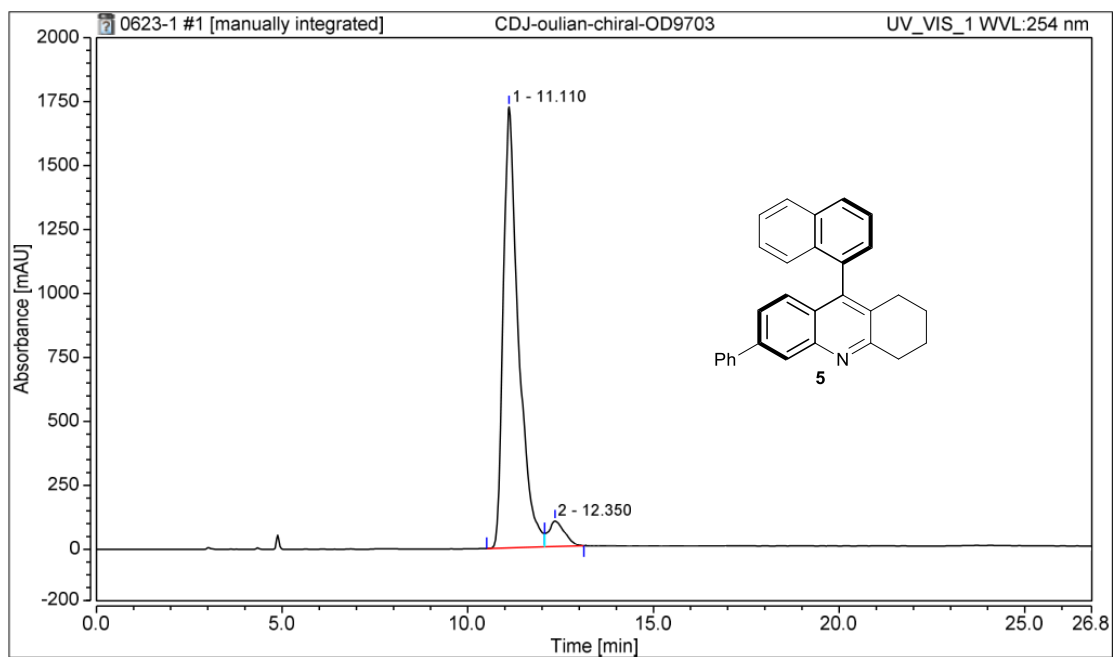

| Integration Results |                       |                 |                 |                    |                |                   |
|---------------------|-----------------------|-----------------|-----------------|--------------------|----------------|-------------------|
| No.                 | Retention Time<br>min | Area<br>mAU*min | Height<br>mAU   | Relative Area<br>% | Asymmetry (EP) | Peak Width<br>min |
| 1                   | 11.110                | 820.365         | 1723.729        | 94.13              | 1.70           | 0.73              |
| 2                   | 12.350                | 51.184          | 99.650          | 5.87               | n.a.           | 0.76              |
| <b>Total:</b>       |                       | <b>871.549</b>  | <b>1823.379</b> | <b>100.00</b>      |                |                   |

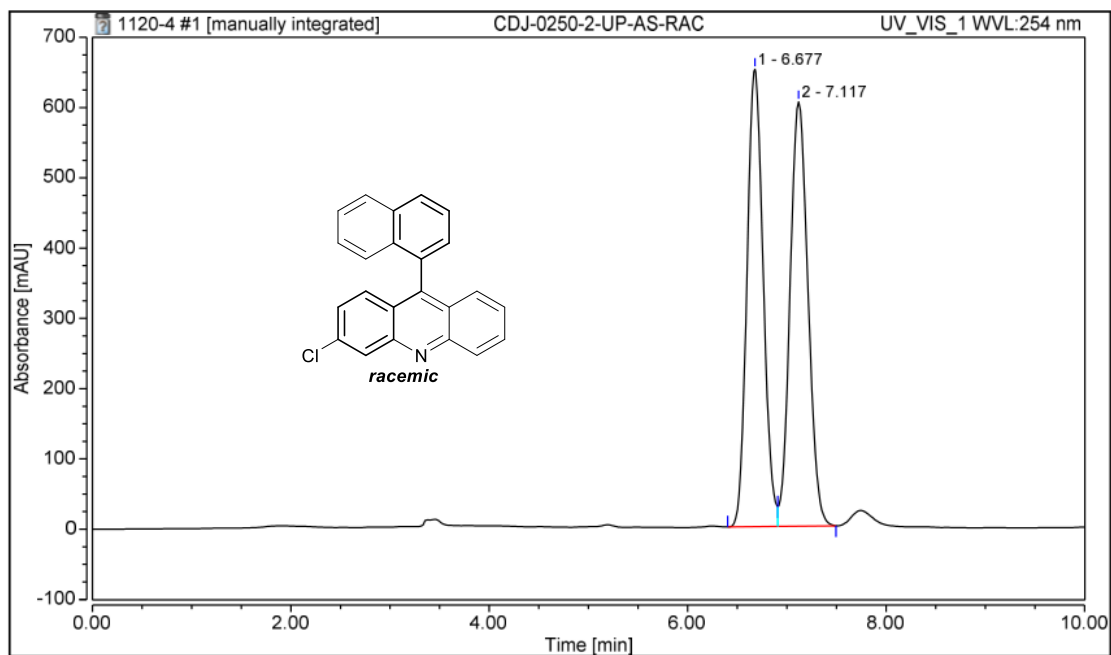

| Integration Results |                       |                 |                 |                    |                |                   |
|---------------------|-----------------------|-----------------|-----------------|--------------------|----------------|-------------------|
| No.                 | Retention Time<br>min | Area<br>mAU*min | Height<br>mAU   | Relative Area<br>% | Asymmetry (EP) | Peak Width<br>min |
| 1                   | 6.677                 | 122.921         | 650.959         | 49.25              | 1.13           | 0.30              |
| 2                   | 7.117                 | 126.641         | 604.088         | 50.75              | 1.07           | 0.34              |
| <b>Total:</b>       |                       | <b>249.562</b>  | <b>1255.046</b> | <b>100.00</b>      |                |                   |

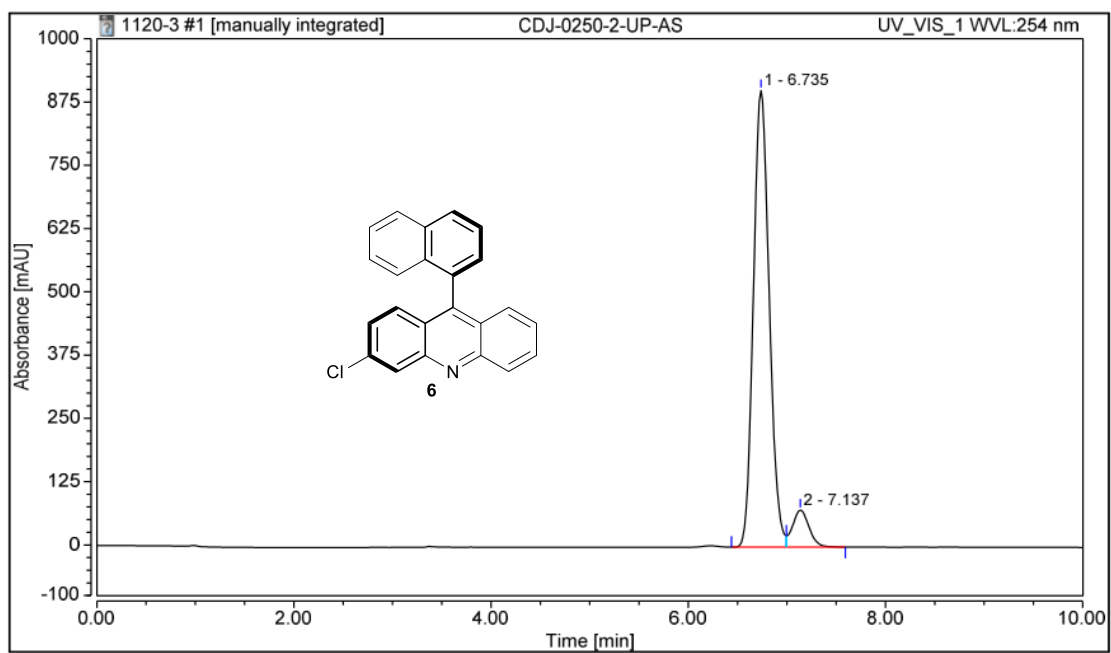

| Integration Results |                       |                 |                |                    |                |                   |
|---------------------|-----------------------|-----------------|----------------|--------------------|----------------|-------------------|
| No.                 | Retention Time<br>min | Area<br>mAU*min | Height<br>mAU  | Relative Area<br>% | Asymmetry (EP) | Peak Width<br>min |
| 1                   | 6.735                 | 167.938         | 902.390        | 92.18              | 1.14           | 0.30              |
| 2                   | 7.137                 | 14.248          | 73.226         | 7.82               | n.a.           | 0.31              |
| <b>Total:</b>       |                       | <b>182.187</b>  | <b>975.616</b> | <b>100.00</b>      |                |                   |

## X-ray Crystallographic Information

CCDC 1998526 (**3aa**) contains the supplementary crystallographic data for this paper. These data can be obtained free of charge from The Cambridge Crystallographic Data Centre via [www.ccdc.cam.ac.uk/data\\_request/cif](http://www.ccdc.cam.ac.uk/data_request/cif).

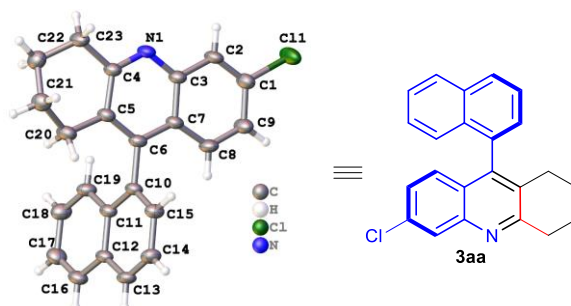

**Table S4. Crystal data and structure refinement**

|                                   |                                                        |                                          |
|-----------------------------------|--------------------------------------------------------|------------------------------------------|
| Identification code               | ndj-hz-3-300k                                          |                                          |
| Empirical formula                 | C <sub>23</sub> H <sub>18</sub> ClN                    |                                          |
| Formula weight                    | 343.83                                                 |                                          |
| Temperature                       | 299.61(10) K                                           |                                          |
| Wavelength                        | 1.54184 Å                                              |                                          |
| Crystal system                    | Monoclinic                                             |                                          |
| Space group                       | P 1 21 1                                               |                                          |
| Unit cell dimensions              | a = 9.4300(2) Å<br>b = 8.4784(2) Å<br>c = 11.9996(2) Å | α = 90°.<br>β = 110.650(2)°.<br>γ = 90°. |
| Volume                            | 897.74(3) Å <sup>3</sup>                               |                                          |
| Z                                 | 2                                                      |                                          |
| Density (calculated)              | 1.272 Mg/m <sup>3</sup>                                |                                          |
| Absorption coefficient            | 1.892 mm <sup>-1</sup>                                 |                                          |
| F(000)                            | 360                                                    |                                          |
| Crystal size                      | ? x ? x ? mm <sup>3</sup>                              |                                          |
| Theta range for data collection   | 3.937 to 76.831°.                                      |                                          |
| Index ranges                      | -11 ≤ h ≤ 11, -10 ≤ k ≤ 10, -14 ≤ l ≤ 9                |                                          |
| Reflections collected             | 9452                                                   |                                          |
| Independent reflections           | 3392 [R(int) = 0.0334]                                 |                                          |
| Completeness to theta = 67.684°   | 99.8%                                                  |                                          |
| Absorption correction             | Semi-empirical from equivalents                        |                                          |
| Max. and min. transmission        | 1.00000 and 0.70534                                    |                                          |
| Refinement method                 | Full-matrix least-squares on F <sup>2</sup>            |                                          |
| Data / restraints / parameters    | 3392 / 31 / 245                                        |                                          |
| Goodness-of-fit on F <sup>2</sup> | 1.313                                                  |                                          |
| Final R indices [I > 2σ(I)]       | R1 = 0.0425, wR2 = 0.1525                              |                                          |
| R indices (all data)              | R1 = 0.0467, wR2 = 0.1547                              |                                          |
| Absolute structure parameter      | 0.040(15)                                              |                                          |
| Extinction coefficient            | n/a                                                    |                                          |
| Largest diff. peak and hole       | 0.247 and -0.216 e.Å <sup>-3</sup>                     |                                          |

**Table S5. Atomic coordinates ( $\times 10^4$ ) and equivalent isotropic displacement parameters ( $\text{\AA}^2 \times 10^3$ ).  $U(\text{eq})$  is defined as one third of the trace of the orthogonalized  $U^{\text{ij}}$  tensor.**

|        | x        | y        | z        | U(eq)  |
|--------|----------|----------|----------|--------|
| Cl(1)  | 192(1)   | 4424(3)  | 1109(1)  | 102(1) |
| N(1)   | 5411(3)  | 4407(5)  | 4265(2)  | 54(1)  |
| C(21)  | 8601(12) | 3720(20) | 7682(13) | 70(4)  |
| C(16)  | 3020(5)  | 6157(6)  | 9535(4)  | 62(1)  |
| C(11)  | 3620(4)  | 5116(5)  | 7859(3)  | 49(1)  |
| C(12)  | 3096(4)  | 4850(5)  | 8823(3)  | 50(1)  |
| C(7)   | 3288(4)  | 4139(5)  | 4967(3)  | 50(1)  |
| C(19)  | 4004(5)  | 6668(5)  | 7647(4)  | 58(1)  |
| C(6)   | 4324(4)  | 4037(5)  | 6152(3)  | 50(1)  |
| C(4)   | 6345(4)  | 4314(6)  | 5372(3)  | 52(1)  |
| C(5)   | 5861(4)  | 4124(5)  | 6372(3)  | 52(1)  |
| C(10)  | 3739(4)  | 3803(5)  | 7156(3)  | 50(1)  |
| C(3)   | 3896(4)  | 4317(6)  | 4046(3)  | 52(1)  |
| C(15)  | 3334(5)  | 2334(5)  | 7397(4)  | 58(1)  |
| C(14)  | 2791(5)  | 2086(6)  | 8342(4)  | 61(1)  |
| C(8)   | 1694(4)  | 4073(6)  | 4639(3)  | 63(1)  |
| C(13)  | 2679(5)  | 3312(5)  | 9031(3)  | 57(1)  |
| C(2)   | 2909(4)  | 4396(7)  | 2853(3)  | 60(1)  |
| C(23)  | 8009(4)  | 4398(8)  | 5552(3)  | 71(1)  |
| C(20)  | 7014(5)  | 4029(7)  | 7613(3)  | 70(1)  |
| C(18)  | 3926(6)  | 7887(6)  | 8366(4)  | 67(1)  |
| C(9)   | 754(4)   | 4168(8)  | 3477(3)  | 70(1)  |
| C(17)  | 3441(6)  | 7621(6)  | 9325(4)  | 69(1)  |
| C(1)   | 1393(4)  | 4318(7)  | 2590(3)  | 67(1)  |
| C(22)  | 9006(18) | 4740(20) | 6813(9)  | 70(4)  |
| C(22A) | 9054(13) | 3900(20) | 6742(7)  | 76(4)  |
| C(21A) | 8568(10) | 4620(20) | 7704(9)  | 72(3)  |

**Table S6. Bond lengths [Å] and angles [°].**

---

|                   |           |
|-------------------|-----------|
| Cl(1)-C(1)        | 1.740(4)  |
| N(1)-C(4)         | 1.311(4)  |
| N(1)-C(3)         | 1.361(4)  |
| C(21)-C(20)       | 1.493(10) |
| C(21)-C(22)       | 1.506(12) |
| C(16)-C(12)       | 1.416(6)  |
| C(16)-C(17)       | 1.354(7)  |
| C(11)-C(12)       | 1.428(4)  |
| C(11)-C(19)       | 1.412(6)  |
| C(11)-C(10)       | 1.424(5)  |
| C(12)-C(13)       | 1.409(6)  |
| C(7)-C(6)         | 1.415(5)  |
| C(7)-C(3)         | 1.422(4)  |
| C(7)-C(8)         | 1.415(5)  |
| C(19)-C(18)       | 1.365(6)  |
| C(6)-C(5)         | 1.381(5)  |
| C(6)-C(10)        | 1.505(4)  |
| C(4)-C(5)         | 1.435(4)  |
| C(4)-C(23)        | 1.509(5)  |
| C(5)-C(20)        | 1.505(5)  |
| C(10)-C(15)       | 1.363(6)  |
| C(3)-C(2)         | 1.407(5)  |
| C(15)-C(14)       | 1.415(5)  |
| C(14)-C(13)       | 1.355(6)  |
| C(8)-C(9)         | 1.365(6)  |
| C(2)-C(1)         | 1.353(5)  |
| C(23)-C(22)       | 1.501(10) |
| C(23)-C(22A)      | 1.483(9)  |
| C(20)-C(21A)      | 1.518(9)  |
| C(18)-C(17)       | 1.399(6)  |
| C(9)-C(1)         | 1.402(5)  |
| C(22A)-C(21A)     | 1.515(11) |
|                   |           |
| C(4)-N(1)-C(3)    | 118.5(3)  |
| C(20)-C(21)-C(22) | 110.8(12) |
| C(17)-C(16)-C(12) | 121.6(4)  |
| C(19)-C(11)-C(12) | 118.5(3)  |
| C(19)-C(11)-C(10) | 122.9(3)  |
| C(10)-C(11)-C(12) | 118.6(3)  |
| C(16)-C(12)-C(11) | 118.1(4)  |
| C(13)-C(12)-C(16) | 122.7(3)  |
| C(13)-C(12)-C(11) | 119.1(3)  |



|                     |           |
|---------------------|-----------|
| C(6)-C(7)-C(3)      | 117.6(3)  |
| C(8)-C(7)-C(6)      | 124.5(3)  |
| C(8)-C(7)-C(3)      | 117.9(3)  |
| C(18)-C(19)-C(11)   | 121.2(4)  |
| C(7)-C(6)-C(10)     | 119.6(3)  |
| C(5)-C(6)-C(7)      | 119.7(3)  |
| C(5)-C(6)-C(10)     | 120.7(3)  |
| N(1)-C(4)-C(5)      | 123.8(3)  |
| N(1)-C(4)-C(23)     | 115.8(3)  |
| C(5)-C(4)-C(23)     | 120.4(3)  |
| C(6)-C(5)-C(4)      | 117.9(3)  |
| C(6)-C(5)-C(20)     | 122.0(3)  |
| C(4)-C(5)-C(20)     | 120.2(3)  |
| C(11)-C(10)-C(6)    | 119.9(3)  |
| C(15)-C(10)-C(11)   | 120.1(3)  |
| C(15)-C(10)-C(6)    | 120.0(3)  |
| N(1)-C(3)-C(7)      | 122.6(3)  |
| N(1)-C(3)-C(2)      | 117.8(3)  |
| C(2)-C(3)-C(7)      | 119.5(3)  |
| C(10)-C(15)-C(14)   | 120.9(4)  |
| C(13)-C(14)-C(15)   | 120.2(4)  |
| C(9)-C(8)-C(7)      | 121.7(3)  |
| C(14)-C(13)-C(12)   | 121.0(3)  |
| C(1)-C(2)-C(3)      | 120.0(3)  |
| C(22)-C(23)-C(4)    | 113.8(7)  |
| C(22A)-C(23)-C(4)   | 115.4(6)  |
| C(21)-C(20)-C(5)    | 115.1(6)  |
| C(5)-C(20)-C(21A)   | 113.3(5)  |
| C(19)-C(18)-C(17)   | 120.3(4)  |
| C(8)-C(9)-C(1)      | 118.9(3)  |
| C(16)-C(17)-C(18)   | 120.2(4)  |
| C(2)-C(1)-C(1)      | 119.3(3)  |
| C(2)-C(1)-C(9)      | 121.9(3)  |
| C(9)-C(1)-C(1)      | 118.7(3)  |
| C(23)-C(22)-C(21)   | 111.4(11) |
| C(23)-C(22A)-C(21A) | 110.0(9)  |
| C(22A)-C(21A)-C(20) | 110.8(10) |

---

**Table S7. Anisotropic displacement parameters ( $\text{\AA}^2 \times 10^3$ ). The anisotropic displacement factor exponent takes the form:  $-2\pi^2 [h^2 a^{*2} U^{11} + \dots + 2hka^* b^* U^{12}]$**

|        | $U^{11}$ | $U^{22}$ | $U^{33}$ | $U^{23}$ | $U^{13}$ | $U^{12}$ |
|--------|----------|----------|----------|----------|----------|----------|
| Cl(1)  | 57(1)    | 205(2)   | 43(1)    | 2(1)     | 15(1)    | 6(1)     |
| N(1)   | 49(1)    | 84(2)    | 38(1)    | 4(2)     | 25(1)    | 4(2)     |
| C(21)  | 61(7)    | 92(9)    | 54(6)    | 11(7)    | 19(5)    | 9(6)     |
| C(16)  | 62(2)    | 88(3)    | 44(2)    | -1(2)    | 30(2)    | 7(2)     |
| C(11)  | 45(2)    | 71(2)    | 37(2)    | 5(1)     | 21(1)    | 6(2)     |
| C(12)  | 43(2)    | 78(3)    | 36(2)    | 5(2)     | 21(1)    | 6(2)     |
| C(7)   | 53(2)    | 68(2)    | 38(2)    | 1(2)     | 26(1)    | 3(2)     |
| C(19)  | 61(2)    | 74(3)    | 50(2)    | 6(2)     | 35(2)    | 4(2)     |
| C(6)   | 56(2)    | 64(2)    | 41(2)    | 3(2)     | 29(1)    | 4(2)     |
| C(4)   | 49(2)    | 73(2)    | 41(2)    | 3(2)     | 24(1)    | 4(2)     |
| C(5)   | 53(2)    | 71(2)    | 38(2)    | 3(2)     | 24(1)    | 6(2)     |
| C(10)  | 49(2)    | 72(3)    | 35(2)    | 4(2)     | 23(1)    | 3(2)     |
| C(3)   | 50(2)    | 73(2)    | 42(2)    | 2(2)     | 26(1)    | 4(2)     |
| C(15)  | 64(2)    | 67(2)    | 51(2)    | 0(2)     | 33(2)    | 1(2)     |
| C(14)  | 65(2)    | 71(3)    | 58(2)    | 11(2)    | 34(2)    | 0(2)     |
| C(8)   | 53(2)    | 96(3)    | 49(2)    | 5(2)     | 31(2)    | 1(2)     |
| C(13)  | 54(2)    | 84(3)    | 42(2)    | 12(2)    | 29(2)    | 4(2)     |
| C(2)   | 56(2)    | 97(3)    | 36(2)    | 5(2)     | 26(1)    | 7(2)     |
| C(23)  | 51(2)    | 120(4)   | 48(2)    | 6(3)     | 26(2)    | 3(3)     |
| C(20)  | 61(2)    | 110(4)   | 42(2)    | 7(2)     | 24(2)    | 7(2)     |
| C(18)  | 73(3)    | 70(3)    | 72(3)    | -2(2)    | 41(2)    | 0(2)     |
| C(9)   | 49(2)    | 119(4)   | 49(2)    | 3(3)     | 23(2)    | 5(3)     |
| C(17)  | 73(3)    | 81(3)    | 61(2)    | -13(2)   | 35(2)    | 4(2)     |
| C(1)   | 54(2)    | 106(3)   | 42(2)    | 4(2)     | 18(1)    | 4(2)     |
| C(22)  | 54(6)    | 87(8)    | 67(7)    | 4(6)     | 20(5)    | -3(6)    |
| C(22A) | 56(5)    | 119(9)   | 58(5)    | 14(5)    | 26(4)    | 17(6)    |
| C(21A) | 60(5)    | 111(8)   | 43(4)    | -1(5)    | 17(3)    | -2(6)    |

**Table S8. Hydrogen coordinates ( $\times 10^4$ ) and isotropic displacement parameters ( $\text{\AA}^2 \times 10^3$ ).**

|        | x     | y    | z     | U(eq) |
|--------|-------|------|-------|-------|
| H(21A) | 8703  | 2616 | 7505  | 84    |
| H(21B) | 9294  | 3929 | 8483  | 84    |
| H(16)  | 2672  | 6005 | 10163 | 74    |
| H(19)  | 4316  | 6864 | 7006  | 69    |
| H(15)  | 3416  | 1484 | 6933  | 69    |
| H(14)  | 2510  | 1079 | 8490  | 74    |
| H(8)   | 1275  | 3961 | 5230  | 75    |
| H(13)  | 2322  | 3135 | 9650  | 68    |
| H(2)   | 3300  | 4502 | 2245  | 72    |
| H(23A) | 8317  | 3402 | 5310  | 85    |
| H(23B) | 8161  | 5214 | 5038  | 85    |
| H(23C) | 8194  | 3742 | 4955  | 85    |
| H(23D) | 8251  | 5476 | 5414  | 85    |
| H(20A) | 6998  | 5015 | 8019  | 84    |
| H(20B) | 6712  | 3199 | 8040  | 84    |
| H(20C) | 7102  | 2941 | 7879  | 84    |
| H(20D) | 6657  | 4644 | 8144  | 84    |
| H(18)  | 4197  | 8898 | 8217  | 81    |
| H(9)   | -292  | 4134 | 3277  | 85    |
| H(17)  | 3407  | 8453 | 9820  | 82    |
| H(22A) | 8901  | 5841 | 6990  | 84    |
| H(22B) | 10056 | 4558 | 6901  | 84    |
| H(22C) | 10078 | 4232 | 6849  | 92    |
| H(22D) | 9048  | 2759 | 6802  | 92    |
| H(21C) | 8542  | 5764 | 7625  | 86    |
| H(21D) | 9300  | 4359 | 8480  | 86    |

**Table S9. Torsion angles [°].**

---

|                          |           |
|--------------------------|-----------|
| N(1)-C(4)-C(5)-C(6)      | 0.0(7)    |
| N(1)-C(4)-C(5)-C(20)     | -179.9(4) |
| N(1)-C(4)-C(23)-C(22)    | 163.8(9)  |
| N(1)-C(4)-C(23)-C(22A)   | -165.4(9) |
| N(1)-C(3)-C(2)-C(1)      | -179.7(5) |
| C(16)-C(12)-C(13)-C(14)  | -178.9(4) |
| C(11)-C(12)-C(13)-C(14)  | 1.0(6)    |
| C(11)-C(19)-C(18)-C(17)  | -0.8(7)   |
| C(11)-C(10)-C(15)-C(14)  | 0.0(6)    |
| C(12)-C(16)-C(17)-C(18)  | 1.8(7)    |
| C(12)-C(11)-C(19)-C(18)  | 2.1(6)    |
| C(12)-C(11)-C(10)-C(6)   | -178.5(3) |
| C(12)-C(11)-C(10)-C(15)  | 1.1(5)    |
| C(7)-C(6)-C(5)-C(4)      | -0.1(6)   |
| C(7)-C(6)-C(5)-C(20)     | 179.8(4)  |
| C(7)-C(6)-C(10)-C(11)    | -99.9(4)  |
| C(7)-C(6)-C(10)-C(15)    | 80.5(5)   |
| C(7)-C(3)-C(2)-C(1)      | 0.6(8)    |
| C(7)-C(8)-C(9)-C(1)      | 0.7(8)    |
| C(19)-C(11)-C(12)-C(16)  | -1.4(5)   |
| C(19)-C(11)-C(12)-C(13)  | 178.7(4)  |
| C(19)-C(11)-C(10)-C(6)   | 1.2(6)    |
| C(19)-C(11)-C(10)-C(15)  | -179.2(4) |
| C(19)-C(18)-C(17)-C(16)  | -1.1(7)   |
| C(6)-C(7)-C(3)-N(1)      | -0.7(6)   |
| C(6)-C(7)-C(3)-C(2)      | 178.9(4)  |
| C(6)-C(7)-C(8)-C(9)      | -179.6(5) |
| C(6)-C(5)-C(20)-C(21)    | 164.6(9)  |
| C(6)-C(5)-C(20)-C(21A)   | -162.9(7) |
| C(6)-C(10)-C(15)-C(14)   | 179.6(4)  |
| C(4)-N(1)-C(3)-C(7)      | 0.5(7)    |
| C(4)-N(1)-C(3)-C(2)      | -179.1(5) |
| C(4)-C(5)-C(20)-C(21)    | -15.5(11) |
| C(4)-C(5)-C(20)-C(21A)   | 17.0(9)   |
| C(4)-C(23)-C(22)-C(21)   | 47.0(18)  |
| C(4)-C(23)-C(22A)-C(21A) | -45.3(16) |
| C(5)-C(6)-C(10)-C(11)    | 81.3(5)   |
| C(5)-C(6)-C(10)-C(15)    | -98.3(5)  |
| C(5)-C(4)-C(23)-C(22)    | -16.8(10) |
| C(5)-C(4)-C(23)-C(22A)   | 14.0(10)  |
| C(5)-C(20)-C(21A)-C(22A) | -48.8(14) |
| C(10)-C(11)-C(12)-C(16)  | 178.3(3)  |

|                           |           |
|---------------------------|-----------|
| C(10)-C(11)-C(12)-C(13)   | -1.6(5)   |
| C(10)-C(11)-C(19)-C(18)   | -177.6(4) |
| C(10)-C(6)-C(5)-C(4)      | 178.6(4)  |
| C(10)-C(6)-C(5)-C(20)     | -1.5(7)   |
| C(10)-C(15)-C(14)-C(13)   | -0.6(7)   |
| C(3)-N(1)-C(4)-C(5)       | -0.1(7)   |
| C(3)-N(1)-C(4)-C(23)      | 179.2(4)  |
| C(3)-C(7)-C(6)-C(5)       | 0.5(6)    |
| C(3)-C(7)-C(6)-C(10)      | -178.3(4) |
| C(3)-C(7)-C(8)-C(9)       | 0.3(7)    |
| C(3)-C(2)-C(1)-Cl(1)      | 179.8(4)  |
| C(3)-C(2)-C(1)-C(9)       | 0.4(9)    |
| C(15)-C(14)-C(13)-C(12)   | 0.1(6)    |
| C(8)-C(7)-C(6)-C(5)       | -179.6(4) |
| C(8)-C(7)-C(6)-C(10)      | 1.6(6)    |
| C(8)-C(7)-C(3)-N(1)       | 179.4(4)  |
| C(8)-C(7)-C(3)-C(2)       | -1.0(7)   |
| C(8)-C(9)-C(1)-Cl(1)      | 179.5(5)  |
| C(8)-C(9)-C(1)-C(2)       | -1.1(9)   |
| C(23)-C(4)-C(5)-C(6)      | -179.3(4) |
| C(23)-C(4)-C(5)-C(20)     | 0.8(7)    |
| C(23)-C(22A)-C(21A)-C(20) | 63.5(18)  |
| C(20)-C(21)-C(22)-C(23)   | -62(2)    |
| C(17)-C(16)-C(12)-C(11)   | -0.6(6)   |
| C(17)-C(16)-C(12)-C(13)   | 179.3(4)  |
| C(22)-C(21)-C(20)-C(5)    | 45.3(17)  |

---

CCDC 1998519 (**3ac**) contains the supplementary crystallographic data for this paper. These data can be obtained free of charge from The Cambridge Crystallographic Data Centre via [www.ccdc.cam.ac.uk/data\\_request/cif](http://www.ccdc.cam.ac.uk/data_request/cif).

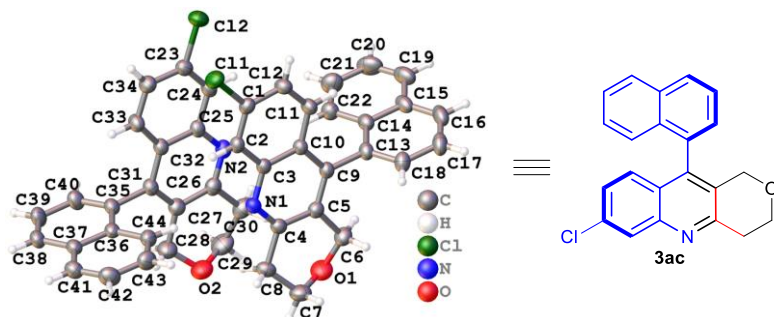

**Table S10. Crystal data and structure refinement**

|                                   |                                               |          |
|-----------------------------------|-----------------------------------------------|----------|
| Identification code               | ndj-hz-2-300k                                 |          |
| Empirical formula                 | C <sub>22</sub> H <sub>16</sub> ClNO          |          |
| Formula weight                    | 345.81                                        |          |
| Temperature                       | 299.69(10) K                                  |          |
| Wavelength                        | 1.54184 Å                                     |          |
| Crystal system                    | Orthorhombic                                  |          |
| Space group                       | P2 <sub>1</sub> 2 <sub>1</sub> 2 <sub>1</sub> |          |
| Unit cell dimensions              | a = 9.35760(10) Å                             | α = 90°. |
|                                   | b = 18.24240(10) Å                            | β = 90°. |
|                                   | c = 20.28210(10) Å                            | γ = 90°. |
| Volume                            | 3462.26(4) Å <sup>3</sup>                     |          |
| Z                                 | 8                                             |          |
| Density (calculated)              | 1.327 Mg/m <sup>3</sup>                       |          |
| Absorption coefficient            | 2.011 mm <sup>-1</sup>                        |          |
| F(000)                            | 1440                                          |          |
| Crystal size                      | ? x ? x ? mm <sup>3</sup>                     |          |
| Theta range for data collection   | 3.258 to 77.281°.                             |          |
| Index ranges                      | -11 ≤ h ≤ 11, -23 ≤ k ≤ 20, -23 ≤ l ≤ 25      |          |
| Reflections collected             | 46005                                         |          |
| Independent reflections           | 7109 [R(int) = 0.0370]                        |          |
| Completeness to theta = 67.684°   | 100.0 %                                       |          |
| Absorption correction             | Semi-empirical from equivalents               |          |
| Max. and min. transmission        | 1.00000 and 0.83498                           |          |
| Refinement method                 | Full-matrix least-squares on F <sup>2</sup>   |          |
| Data / restraints / parameters    | 7109 / 0 / 451                                |          |
| Goodness-of-fit on F <sup>2</sup> | 1.051                                         |          |
| Final R indices [I > 2σ(I)]       | R1 = 0.0385, wR2 = 0.1143                     |          |
| R indices (all data)              | R1 = 0.0403, wR2 = 0.1162                     |          |
| Absolute structure parameter      | -0.002(5)                                     |          |
| Extinction coefficient            | n/a                                           |          |
| Largest diff. peak and hole       | 0.503 and -0.300 e.Å <sup>-3</sup>            |          |

CCDC 1998518 (**3aj**) contains the supplementary crystallographic data for this paper. These data can be obtained free of charge from The Cambridge Crystallographic Data Centre via [www.ccdc.cam.ac.uk/data\\_request/cif](http://www.ccdc.cam.ac.uk/data_request/cif).

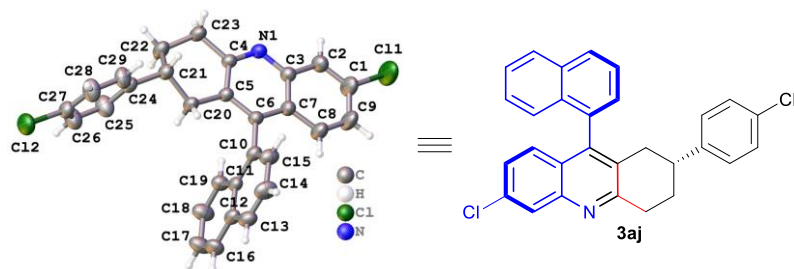

**Table S11. Crystal data and structure refinement**

|                                   |                                                   |                 |
|-----------------------------------|---------------------------------------------------|-----------------|
| Identification code               | ndj-hz-1-300k                                     |                 |
| Empirical formula                 | C <sub>29</sub> H <sub>21</sub> Cl <sub>2</sub> N |                 |
| Formula weight                    | 454.37                                            |                 |
| Temperature                       | 299.60(10) K                                      |                 |
| Wavelength                        | 1.54184 Å                                         |                 |
| Crystal system                    | Monoclinic                                        |                 |
| Space group                       | P 1 21 1                                          |                 |
| Unit cell dimensions              | a = 10.8865(3) Å                                  | α = 90°.        |
|                                   | b = 8.8581(3) Å                                   | β = 97.528(2)°. |
|                                   | c = 12.0837(4) Å                                  | γ = 90°.        |
| Volume                            | 1155.23(6) Å <sup>3</sup>                         |                 |
| Z                                 | 2                                                 |                 |
| Density (calculated)              | 1.306 Mg/m <sup>3</sup>                           |                 |
| Absorption coefficient            | 2.644 mm <sup>-1</sup>                            |                 |
| F(000)                            | 472                                               |                 |
| Crystal size                      | ? x ? x ? mm <sup>3</sup>                         |                 |
| Theta range for data collection   | 3.690 to 76.873°.                                 |                 |
| Index ranges                      | -12 ≤ h ≤ 13, -11 ≤ k ≤ 10, -14 ≤ l ≤ 15          |                 |
| Reflections collected             | 12833                                             |                 |
| Independent reflections           | 4168 [R(int) = 0.0348]                            |                 |
| Completeness to theta = 67.684°   | 99.9 %                                            |                 |
| Absorption correction             | Semi-empirical from equivalents                   |                 |
| Max. and min. transmission        | 1.00000 and 0.74959                               |                 |
| Refinement method                 | Full-matrix least-squares on F <sup>2</sup>       |                 |
| Data / restraints / parameters    | 4168 / 1 / 289                                    |                 |
| Goodness-of-fit on F <sup>2</sup> | 1.079                                             |                 |
| Final R indices [I > 2σ(I)]       | R1 = 0.0611, wR2 = 0.1885                         |                 |
| R indices (all data)              | R1 = 0.0646, wR2 = 0.1934                         |                 |
| Absolute structure parameter      | 0.05(3)                                           |                 |
| Extinction coefficient            | n/a                                               |                 |
| Largest diff. peak and hole       | 0.262 and -0.196 e.Å <sup>-3</sup>                |                 |
